# Supplementary material for: NHC-catalyzed Truce–Smiles rearrangement of N-aryl methacrylamides for the synthesis of trans-cinnamides
Source: Royal Society of Chemistry journal article supplement (doi:10.1039/d1ob00443c), 2021-01-01

# NHC-Catalyzed Truce-Smiles Rearrangement of *N*-Aryl Methacrylamides Enabling the Cleavage of an Inert Aryl C-N Bond

Yuanyuan Hu,<sup>[a]</sup> Zhen Wang,<sup>[a]</sup> Honggen Luo,<sup>[a]</sup> Hongwei Jin,<sup>[a]</sup> Yunkui Liu<sup>[a]</sup> and Bingwei Zhou\*<sup>[a]</sup>

<sup>[a]</sup>College of Chemical Engineering, Zhejiang University of Technology, Hangzhou, 310014, China. E-mail: zhoubw@zjut.edu.cn

## Table of Contents

|                                                                               |     |
|-------------------------------------------------------------------------------|-----|
| 1. General Information                                                        | S2  |
| 2. Preparation of <i>N</i> -Aryl Methacrylamides                              | S3  |
| 3. NHC-Catalyzed Truce-Smiles Rearrangement of <i>N</i> -Aryl Methacrylamides | S7  |
| 3.1 Optimization of reaction conditions                                       | S7  |
| 3.2 Typical procedure and characterization of products                        | S10 |
| 3.3 Gram-scale reaction                                                       | S17 |
| 4. Mechanistic Experiments                                                    | S18 |
| 5. X-Ray Crystallography Data for <b>2e</b>                                   | S20 |
| 6. References                                                                 | S22 |
| 7. <sup>1</sup> H <sup>13</sup> C and <sup>19</sup> F NMR Spectra             | S23 |

## 1. General Information

Unless otherwise noted, all reactions were carried out in flame-dried reaction vessels with Teflon screw caps under nitrogen. Solvents were purified and dried according to standard methods prior to use. All commercially available reagents were obtained from chemical suppliers and used after proper purification if necessary. Flash column chromatography was performed on silica gel (200-300 mesh) with the indicated solvent mixtures. TLC analysis was performed on pre-coated, glass-backed silica gel plates and visualized with UV light.

The  $^1\text{H}$  NMR and  $^{13}\text{C}$  NMR spectra were recorded on a Bruker 500 AV spectrometers.  $^{19}\text{F}$  NMR spectra were recorded on a Bruker 400 AV spectrometer. Chemical shifts ( $\delta$ ) were reported as parts per million (ppm) downfield from tetramethylsilane and the following abbreviations were used to identify the multiplicities: s = singlet, d = doublet, t = triplet, q = quartet, m = multiplet, dd = doublet of doublets, dt = doublet of triplets, dq = doublet of quartets, br = broad and all combinations thereof can be explained by their integral parts. Coupling constant ( $J$ ) was reported in hertz unit (Hz). The high resolution mass spectra (HRMS) were recorded on a Bruker Apex IV FTMS spectrometer.

## 2. Preparation of *N*-Aryl Methacrylamides

The methacrylamides **1a**<sup>[1]</sup>, **1b**<sup>[2]</sup>, **1c**<sup>[3]</sup>, **1g**<sup>[1]</sup>, **1j**<sup>[4]</sup>, **1k**<sup>[4]</sup>, **1o**<sup>[5]</sup>, **1q**<sup>[6]</sup>, **1r**<sup>[7]</sup> were prepared according to the known literature<sup>[8]</sup>. **1d**, **1e**, **1f**, **1h**, **1i**, **1l**, **1m**, **1n**, **1p**, **1s** are new compounds.

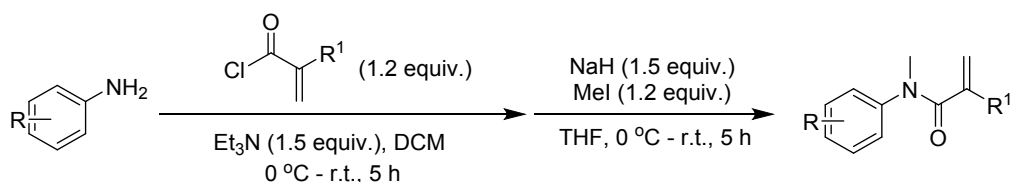

Under N<sub>2</sub>, to a 100 mL Schleck tube with a stir bar was added amine (10 mmol), DCM (30 mL) and Et<sub>3</sub>N (15 mmol). The reaction mixture was cooled to 0 °C, then methacryloyl chloride (12 mmol) was added. The mixture was stirred at room temperature for 5 h. The mixture was poured into brine and extracted with DCM. The combined extracts were dried over Na<sub>2</sub>SO<sub>4</sub>, filtered, and evaporated under vacuo. The corresponding N-H enamide was obtained after purification by flash chromatography on silica gel with PE/EA as the eluent or used without further purification.

Under N<sub>2</sub>, to a 100 mL Schleck tube with a stir bar was added the above N-H enamide (5 mmol) and dry THF (20 mL). The reaction mixture was cooled to 0 °C, then NaH (7.5 mmol) was added. The mixture was stirred at room temperature for 30 min. Then MeI (6 mmol) were added to above solution and stirred for another 5 h. The mixture was quenched with saturated ammonium chloride solution and extracted with EtOAc. The combined extracts were dried over Na<sub>2</sub>SO<sub>4</sub>, filtered, and evaporated under vacuo. The corresponding Methacrylamides was obtained after purification by flash chromatography on silica gel with PE/EA as the eluent. The **1s** was obtained with 2-phenylacryloyl chloride instead of methacryloyl chloride.

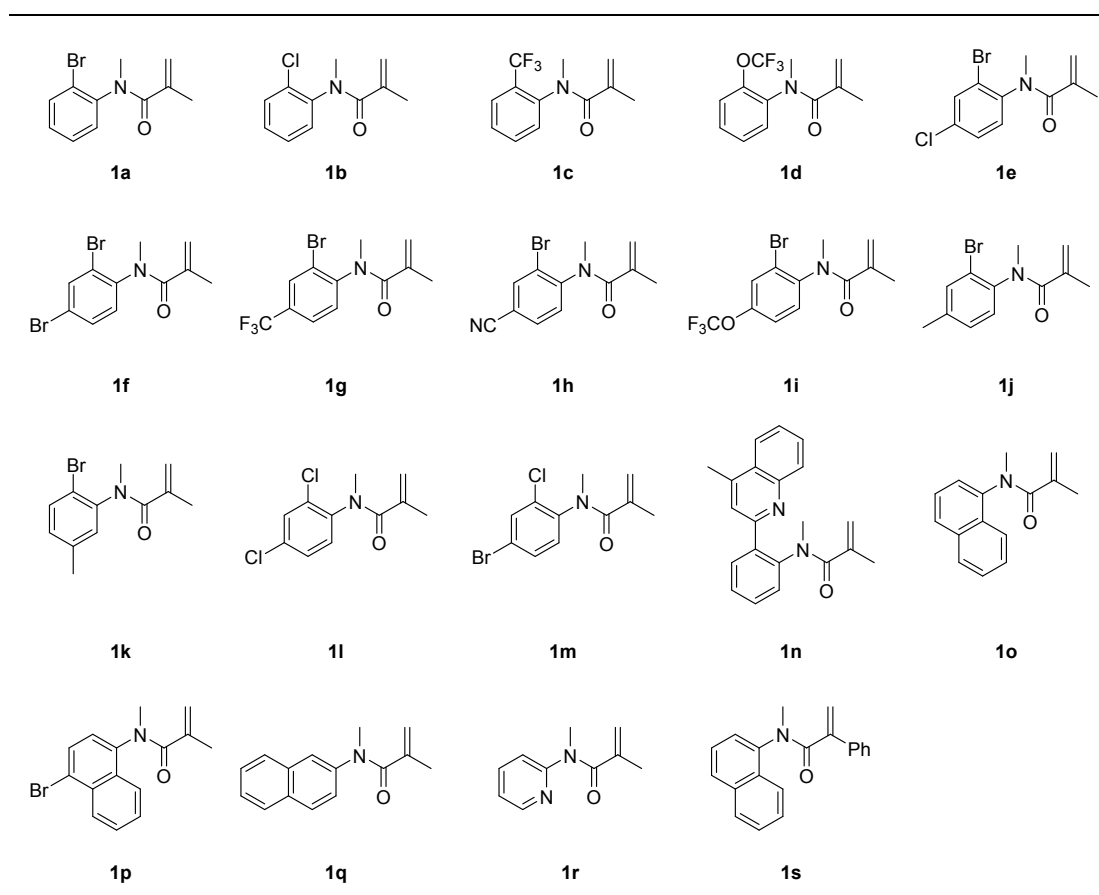

## Characterization of new compounds

### N-methyl-N-(2-(trifluoromethoxy)phenyl)methacrylamide (1d)

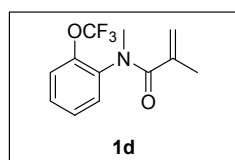

$^1\text{H NMR}$  (500 MHz,  $\text{CDCl}_3$ )  $\delta$  7.36-7.21 (m, 4H), 4.99 (s, 1H), 4.83 (s, 1H), 3.28 (s, 3H), 1.83 (s, 3H).  $^{13}\text{C NMR}$  (126 MHz,  $\text{CDCl}_3$ )  $\delta$  171.9, 144.5, 140.0, 136.9, 129.1, 128.5, 127.3, 120.9, 120.2 (q,  $J = 257.5$  Hz),

118.7, 37.0, 19.7. **HRMS(ESI)** Calculated for  $\text{C}_{12}\text{H}_{13}\text{O}_2\text{NF}_3^+$  ( $[\text{M}+\text{H}]^+$ ): 260.0893, found: 260.0896.

### N-(2-bromo-4-chlorophenyl)-N-methylmethacrylamide (1e)

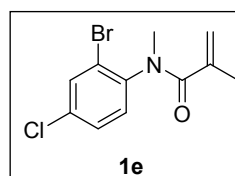

$^1\text{H NMR}$  (500 MHz,  $\text{CDCl}_3$ )  $\delta$  7.61 (d,  $J = 2.2$  Hz, 1H), 7.28 (d,  $J = 6.9$  Hz, 1H), 7.11 (d,  $J = 8.2$  Hz, 1H), 4.98 (s, 2H), 3.20 (s, 3H), 1.80 (s, 3H).

$^{13}\text{C NMR}$  (125 MHz,  $\text{CDCl}_3$ )  $\delta$  171.8, 142.4, 140.0, 134.2, 133.4, 130.5, 128.8, 123.5, 119.0, 36.4, 20.2. **HRMS(ESI)** Calculated for

$\text{C}_{11}\text{H}_{12}\text{ONBrCl}^+$  ( $[\text{M}+\text{H}]^+$ ): 287.9785, found: 287.9789.

### N-(2,4-dibromophenyl)-N-methylmethacrylamide (1f)

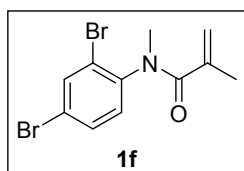

<sup>1</sup>H NMR (500 MHz, CDCl<sub>3</sub>) δ 7.78 (d, *J* = 2.1 Hz, 1H), 7.51-7.43 (m, 1H), 7.10 (d, *J* = 8.2 Hz, 1H), 5.01 (d, *J* = 6.5 Hz, 2H), 3.23 (s, 3H), 1.84 (s, 3H). <sup>13</sup>C NMR (125 MHz, CDCl<sub>3</sub>) δ 171.4, 142.6, 139.7, 135.9, 131.6, 130.7, 123.5, 121.6, 118.8, 36.1, 20.0. HRMS(ESI) Calculated for C<sub>11</sub>H<sub>12</sub>ONBr<sub>2</sub><sup>+</sup> ([M+H]<sup>+</sup>): 331.9280, found: 331.9283.

#### N-(2-bromo-4-cyanophenyl)-N-methylmethacrylamide (1h)

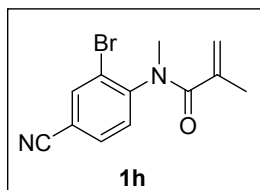

<sup>1</sup>H NMR (500 MHz, CDCl<sub>3</sub>) δ 7.92 (d, *J* = 1.8 Hz, 1H), 7.63 – 7.59 (m, 1H), 7.29 (d, *J* = 8.1 Hz, 1H), 5.06 (s, 1H), 4.97 (s, 1H), 3.24 (s, 3H), 1.85 (s, 3H). <sup>13</sup>C NMR (125 MHz, CDCl<sub>3</sub>) δ 171.3, 148.0, 139.6, 137.2, 132.2, 130.5, 123.5, 119.6, 116.5, 112.9, 36.6, 20.0. HRMS(ESI) Calculated for C<sub>12</sub>H<sub>12</sub>ON<sub>2</sub>Br<sup>+</sup> ([M+H]<sup>+</sup>): 279.0128, found: 279.0133.

#### N-(2-bromo-4-(trifluoromethoxy)phenyl)-N-methylmethacrylamide (1i)

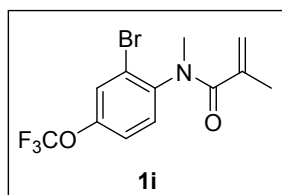

<sup>1</sup>H NMR (500 MHz, CDCl<sub>3</sub>) δ 7.49 (s, 1H), 7.25-7.13 (m, 2H), 4.99 (d, *J* = 10.9 Hz, 2H), 3.23 (s, 3H), 1.81 (s, 3H). <sup>13</sup>C NMR (126 MHz, CDCl<sub>3</sub>) δ 171.7, 148.2, 142.3, 139.9, 130.6, 127.7, 126.0, 123.5, 120.7, 119.0, 120.2 (q, *J* = 257.4 Hz), 36.4, 20.1. HRMS(ESI) Calculated for C<sub>12</sub>H<sub>12</sub>O<sub>2</sub>BrNF<sub>3</sub><sup>+</sup> ([M+H]<sup>+</sup>): 337.9998, found: 338.0001.

#### N-(2,4-dichlorophenyl)-N-methylmethacrylamide (1l)

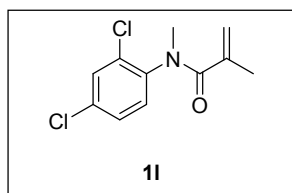

<sup>1</sup>H NMR (500 MHz, CDCl<sub>3</sub>) δ 7.43 (d, *J* = 2.2 Hz, 1H), 7.25-7.20 (m, 1H), 7.10 (d, *J* = 8.3 Hz, 1H), 4.98 (s, 1H), 4.94 (s, 1H), 3.20 (s, 3H), 1.79 (s, 3H). <sup>13</sup>C NMR (126 MHz, CDCl<sub>3</sub>) δ 171.8, 140.8, 139.9, 134.0, 133.3, 130.4, 130.3, 128.1, 118.7, 36.2, 20.0. HRMS(ESI) Calculated for C<sub>11</sub>H<sub>12</sub>ONCl<sub>2</sub><sup>+</sup> ([M+H]<sup>+</sup>): 244.0291, found: 244.0293.

#### N-(4-bromo-2-chlorophenyl)-N-methylmethacrylamide (1m)

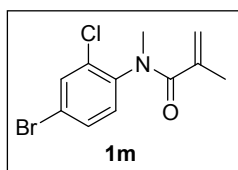

<sup>1</sup>H NMR (500 MHz, CDCl<sub>3</sub>) δ 7.59 (d, *J* = 2.0 Hz, 1H), 7.38 (dd, *J* = 8.3, 1.6 Hz, 1H), 7.04 (d, *J* = 8.2 Hz, 1H), 4.99 (s, 1H), 4.95 (s, 1H), 3.21 (s, 3H), 1.80 (s, 3H). <sup>13</sup>C NMR (125 MHz, CDCl<sub>3</sub>) δ 171.8, 141.3, 139.9, 133.6, 133.2, 131.1, 130.8, 121.6, 118.9, 36.2, 20.1. HRMS(ESI) Calculated for C<sub>11</sub>H<sub>12</sub>ONBrCl<sup>+</sup> ([M+H]<sup>+</sup>): 287.9785, found: 287.9789.

### N-methyl-N-(2-(4-methylquinolin-2-yl)phenyl)methacrylamide (1n)

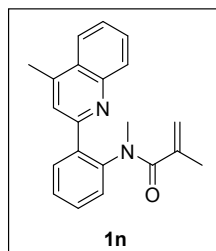

**<sup>1</sup>H NMR (500 MHz, CDCl<sub>3</sub>)** δ 8.14 (d, *J* = 8.3 Hz, 1H), 8.01 (d, *J* = 8.3 Hz, 1H), 7.79 – 7.67 (m, 2H), 7.61 – 7.55 (m, 1H), 7.48 – 7.40 (m, 2H), 7.36 (s, 1H), 7.30 (d, *J* = 7.3 Hz, 1H), 4.95 (s, 1H), 4.87 (s, 1H), 3.31 (s, 3H), 2.74 (s, 3H). **<sup>13</sup>C NMR (125 MHz, CDCl<sub>3</sub>)** δ 171.4, 156.4, 148.0, 144.8, 142.9, 140.0, 137.9, 131.3, 130.4, 129.6, 129.5, 128.6, 127.9, 126.6, 123.6, 121.9,

119.7, 38.2, 19.9, 19.0. **HRMS(ESI)** Calculated for C<sub>21</sub>H<sub>21</sub>ON<sub>2</sub><sup>+</sup> ([M+H]<sup>+</sup>): 317.1648, found: 317.1652.

### N-(4-bromonaphthalen-1-yl)-N-methylmethacrylamide (1p)

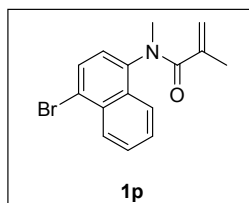

**<sup>1</sup>H NMR (500 MHz, CDCl<sub>3</sub>)** δ 8.23 (d, *J* = 8.6 Hz, 1H), 7.92-7.76 (m, 2H), 7.53 (s, 1H), 7.40 (s, 1H), 7.31 (d, *J* = 7.2 Hz, 1H), 4.85 (s, 1H), 4.77 (s, 1H), 3.38 (s, 3H), 1.68 (s, 3H). **<sup>13</sup>C NMR (125 MHz, CDCl<sub>3</sub>)** δ 172.7, 141.3, 140.2, 133.1, 131.5, 130.7, 127.5, 127.4, 126.9, 126.2,

123.6, 122.6, 118.1, 37.7, 20.3. **HRMS(ESI)** Calculated for C<sub>15</sub>H<sub>15</sub>ONBr<sup>+</sup> ([M+H]<sup>+</sup>): 304.0332, found: 304.0335.

### N-methyl-N-(naphthalen-1-yl)-2-phenylacrylamide (1s)

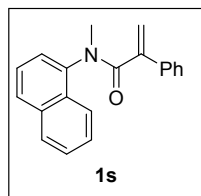

**<sup>1</sup>H NMR (500 MHz, CDCl<sub>3</sub>)** δ 7.82-7.74 (m, 2H), 7.70 (d, *J* = 8.3 Hz, 1H), 7.50-7.44 (m, 2H), 7.23-7.17 (m, 1H), 7.15-7.03 (m, 5H), 7.00 – 6.94 (m, 1H), 5.28 (s, 1H), 5.16 (s, 1H), 3.49 (s, 3H). **<sup>13</sup>C NMR (125 MHz, CDCl<sub>3</sub>)** δ 171.5, 145.7, 139.7, 136.9, 134.3, 129.8, 128.5, 128.3, 128.1, 127.7, 126.8, 126.3,

126.2, 126.0, 125.2, 122.9, 122.8, 116.7, 116.5, 116.3, 37.3, 37.3. **HRMS(ESI)** Calculated for C<sub>20</sub>H<sub>18</sub>ON<sup>+</sup> ([M+H]<sup>+</sup>): 288.1383, found: 288.1386.

### 3. NHC-Catalyzed Truce-Smiles Rearrangement of *N*-Aryl

#### Methacrylamides

##### 3.1 Optimization of reaction conditions

Survey of the reaction parameters<sup>a</sup>

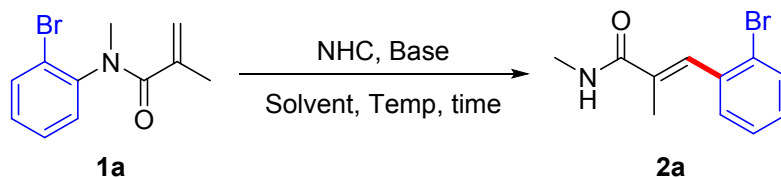

| Entry | NHC/mol%    | Base/equiv. | Temp/°C | Solvent/ml    | Yield/% |
|-------|-------------|-------------|---------|---------------|---------|
| 1     | NHC 1 (20)  | NaOEt (0.3) | 150     | Toluene (0.5) | 74      |
| 2     | NHC 2 (20)  | NaOEt (0.3) | 150     | Toluene (0.5) | Trace   |
| 3     | NHC 3 (20)  | NaOEt (0.3) | 150     | Toluene (0.5) | 35      |
| 4     | NHC 4 (20)  | NaOEt (0.3) | 150     | Toluene (0.5) | 0       |
| 5     | NHC 5 (20)  | NaOEt (0.3) | 150     | Toluene (0.5) | 68      |
| 6     | NHC 6 (20)  | NaOEt (0.3) | 150     | Toluene (0.5) | 0       |
| 7     | NHC 7 (20)  | NaOEt (0.3) | 150     | Toluene (0.5) | 36      |
| 8     | NHC 8 (20)  | NaOEt (0.3) | 150     | Toluene (0.5) | Trace   |
| 9     | NHC 9 (20)  | NaOEt (0.3) | 150     | Toluene (0.5) | 0       |
| 10    | NHC 10 (20) | NaOEt (0.3) | 150     | Toluene (0.5) | 0       |
| 11    | NHC 11 (20) | NaOEt (0.3) | 150     | Toluene (0.5) | 0       |
| 12    | NHC 12 (20) | NaOEt (0.3) | 150     | Toluene (0.5) | 0       |

|    |                   |                                       |     |                          |       |
|----|-------------------|---------------------------------------|-----|--------------------------|-------|
| 13 | - <sup>c</sup>    | NaOEt (0.3)                           | 150 | Toluene (0.5)            | 0     |
| 14 | <b>NHC 1</b> (20) | NaO <i>t</i> -Bu (0.3)                | 150 | Toluene (0.5)            | 47    |
| 16 | <b>NHC 1</b> (20) | Na <sub>2</sub> CO <sub>3</sub> (0.3) | 150 | Toluene (0.5)            | 34    |
| 17 | <b>NHC 1</b> (20) | NaOMe (0.3)                           | 150 | Toluene (0.5)            | 54    |
| 18 | <b>NHC 1</b> (20) | NaH (0.3)                             | 150 | Toluene (0.5)            | 48    |
| 19 | <b>NHC 1</b> (20) | K <sub>3</sub> PO <sub>4</sub> (0.3)  | 150 | Toluene (0.5)            | 53    |
| 20 | <b>NHC 1</b> (20) | Et <sub>3</sub> N (0.3)               | 150 | Toluene (0.5)            | 0     |
| 21 | <b>NHC 1</b> (20) | DBU (0.3)                             | 150 | Toluene (0.5)            | 0     |
| 22 | <b>NHC 1</b> (20) | DABCO (0.3)                           | 150 | Toluene (0.5)            | 0     |
| 23 | <b>NHC 1</b> (20) | -- <sup>b</sup>                       | 150 | Toluene (0.5)            | 0     |
| 24 | <b>NHC 1</b> (20) | NaOEt (0.5)                           | 150 | Toluene (0.5)            | 51    |
| 26 | <b>NHC 1</b> (20) | NaOEt (0.3)                           | 120 | Toluene (0.5)            | 31    |
| 27 | <b>NHC 1</b> (20) | NaOEt (0.3)                           | 150 | THF (0.5)                | 53    |
| 28 | <b>NHC 1</b> (20) | NaOEt (0.3)                           | 150 | Dioxane (0.5)            | 38    |
| 29 | <b>NHC 1</b> (20) | NaOEt (0.3)                           | 150 | CH <sub>3</sub> CN (0.5) | 25    |
| 30 | <b>NHC 1</b> (20) | NaOEt (0.3)                           | 150 | DMF (0.5)                | Trace |
| 31 | <b>NHC 1</b> (20) | NaOEt (0.3)                           | 150 | Xylene (0.5)             | 48    |
| 32 | <b>NHC 1</b> (20) | NaOEt (0.3)                           | 150 | DMSO (0.5)               | 0     |
| 33 | <b>NHC 1</b> (20) | NaOEt (0.3)                           | 150 | Toluene                  | 56    |



|    |            |              |     |               |                 |
|----|------------|--------------|-----|---------------|-----------------|
|    |            |              |     | (1.0)         |                 |
| 34 | NHC 1 (10) | NaOEt (0.15) | 150 | Toluene (0.5) | 59              |
| 35 | NHC 1 (20) | NaOEt (0.3)  | 150 | Toluene (0.5) | 62 <sup>d</sup> |

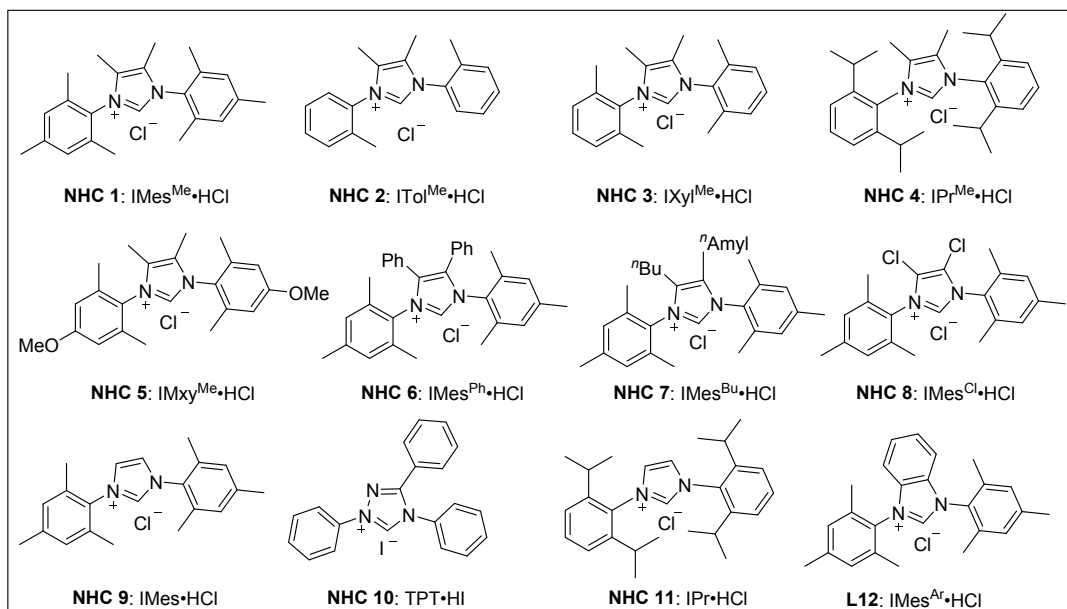

<sup>a</sup>Reaction conditions unless otherwise noted: **1a** (0.2 mmol), NHC (0.04 mmol), Base (0.06 mmol), Solvent (0.5 mL), 150 °C, 36 h under N<sub>2</sub> atmosphere. <sup>b</sup>No Base. <sup>c</sup>No NHC. <sup>d</sup>for 24 h.

### 3.2 Typical procedure and characterization of products

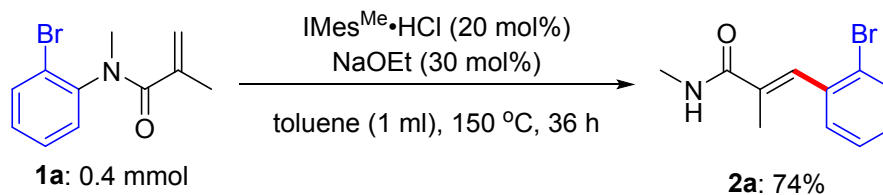

To a 25 ml flame-dried Schlenk tube containing a stirring bar was added IMes<sup>Me</sup>·HCl (**NHC 1**, 20 mol%, 0.08 mmol, 29.4 mg), NaOEt (0.12 mmol, 8.2 mg), toluene (1 mL) and N-(2-bromophenyl)-N-methylmethacrylamide **1a** (0.4 mmol, 101.2 mg) sequentially under nitrogen. The tube was sealed and stirred at 150 °C for 36 h. After completion, the reaction mixture was diluted with ethyl acetate (5.0 mL) and filtered through a short pad silica gel washing with ethyl acetate (20 mL). The filtrate was concentrated and purified by silica gel column chromatography to provide the product **2a** in 74% yield.

#### (*E*)-3-(2-bromophenyl)-*N*,2-dimethylacrylamide (**2a**)

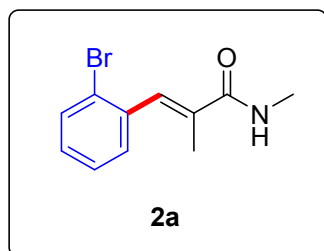

Purified by silica gel column chromatography (Petroleum ether/EtOAc = 3:1 to 1:1) as yellow oil (81 mg, 74% yield).

<sup>1</sup>H NMR (500 MHz, CDCl<sub>3</sub>) δ 7.60 (dd, *J*<sub>1</sub> = 8.0, *J*<sub>2</sub> = 1.0 Hz, 1H), 7.33-7.29 (m, 1H), 7.28-7.23 (m, 2H), 7.20-7.14 (m, 1H), 5.99 (s, 1H), 2.95 (d, *J* = 4.9 Hz, 3H), 1.97 (d, *J* = 1.4 Hz, 3H). <sup>13</sup>C NMR

(125 MHz, CDCl<sub>3</sub>) δ 169.8, 136.4, 134.0, 132.7, 132.5, 130.4, 129.2, 127.0, 124.1, 26.7, 14.2.

HRMS(ESI) Calculated for C<sub>11</sub>H<sub>13</sub>ONBr<sup>+</sup> ([M+H]<sup>+</sup>): 254.0175, found: 254.0179.

#### (*E*)-3-(2-chlorophenyl)-*N*,2-dimethylacrylamide (**2b**)

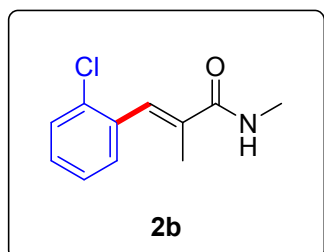

Purified by silica gel column chromatography (Petroleum ether/EtOAc = 3:1 to 1:1) as yellow oil (50 mg, 60% yield).

<sup>1</sup>H NMR (500 MHz, CDCl<sub>3</sub>) δ 7.44-7.39 (m, 1H), 7.32 (s, 1H), 7.28-7.26 (m, 3H), 6.01 (s, 1H), 2.96 (d, *J* = 4.8 Hz, 3H), 1.99 (d, *J*

= 1.3 Hz, 3H). <sup>13</sup>C NMR (125 MHz, CDCl<sub>3</sub>) δ 169.8, 134.6, 134.4, 134.0, 130.4, 130.4, 129.5,

129.0, 126.4, 26.7, 14.3. **HRMS(ESI)** Calculated for  $C_{11}H_{13}ONCl^+$  ( $[M+H]^+$ ): 210.0680, found: 210.0682.

**(E)-N,2-dimethyl-3-(2-(trifluoromethyl)phenyl)acrylamide (2c)**

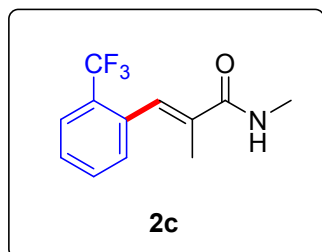

Purified by silica gel column chromatography (Petroleum ether/EtOAc = 3:1 to 1:1) as yellow oil (55 mg, 56% yield).

**$^1H$  NMR (500 MHz,  $CDCl_3$ )**  $\delta$  7.67 (d,  $J$  = 7.7 Hz, 1H), 7.53 (t,  $J$  = 7.5 Hz, 1H), 7.43-7.37 (m, 2H), 7.28 (s, 1H), 6.16 (s, 1H), 2.93 (d,  $J$  = 4.8 Hz, 3H), 1.88 (d,  $J$  = 1.1 Hz, 3H).  **$^{13}C$  NMR (125 MHz,  $CDCl_3$ )**  $\delta$  169.5, 135.0 (q,  $J$  = 1.8 Hz), 134.9, 131.5, 130.5, 130.0, 128.5 (q,  $J$  = 30.0 Hz), 127.6,

125.8 (q,  $J$  = 5.3 Hz), 124.0 (q,  $J$  = 273.7 Hz), 26.6, 14.1.  **$^{19}F$  NMR (376 MHz,  $CDCl_3$ )**  $\delta$  -60.8.

**HRMS(ESI)** Calculated for  $C_{12}H_{13}ONF_3^+$  ( $[M+H]^+$ ): 244.0943, found: 244.0949.

**(E)-N,2-dimethyl-3-(2-(trifluoromethoxy)phenyl)acrylamide (2d)**

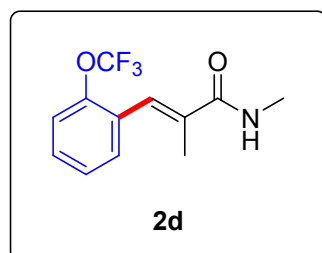

Purified by silica gel column chromatography (Petroleum ether/EtOAc = 3:1 to 1:1) as yellow oil (61 mg, 59% yield).

**$^1H$  NMR (500 MHz,  $CDCl_3$ )**  $\delta$  7.34-7.23 (m, 5H), 6.35 (s, 1H), 2.91 (d,  $J$  = 4.8 Hz, 3H), 1.96 (d,  $J$  = 1.2 Hz, 3H).  **$^{13}C$  NMR (125 MHz,  $CDCl_3$ )**  $\delta$  169.6, 146.9, 134.9, 130.7, 129.6, 129.1, 127.4,

126.4, 121.4, 120.4 (q,  $J$  = 256.3 Hz), 26.6, 14.2.  **$^{19}F$  NMR (376 MHz,  $CDCl_3$ )**  $\delta$  -56.7.

**HRMS(ESI)** Calculated for  $C_{12}H_{13}O_2NF_3^+$  ( $[M+H]^+$ ): 260.0893, found: 269.0897.

**(E)-3-(2-bromo-4-chlorophenyl)-N,2-dimethylacrylamide (2e)**

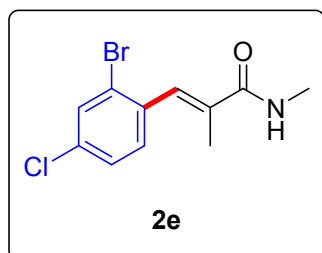

Purified by silica gel column chromatography (Petroleum ether/EtOAc = 3:1 to 1:1) as yellow solid (76 mg, 66% yield). mp: 62-64 °C.

**$^1H$  NMR (500 MHz,  $CDCl_3$ )**  $\delta$  7.61 (d,  $J$  = 2.0 Hz, 1H), 7.31-7.28 (m, 1H), 7.20 (s, 1H), 7.17 (d,  $J$  = 8.3 Hz, 1H), 6.20 (s, 1H), 2.94 (d,  $J$  = 4.8 Hz, 3H), 1.95 (d,  $J$  = 1.3 Hz, 3H).  **$^{13}C$  NMR (125 MHz,  $CDCl_3$ )**  $\delta$  169.4, 134.9, 134.5, 134.1, 132.3, 131.6, 131.0,

127.3, 124.4, 26.7, 14.2. **HRMS(ESI)** Calculated for  $C_{11}H_{12}ONBrCl^+$  ( $[M+H]^+$ ): 287.9785, found: 287.9792.

### (E)-3-(2,4-dibromophenyl)-N,2-dimethylacrylamide (2f)

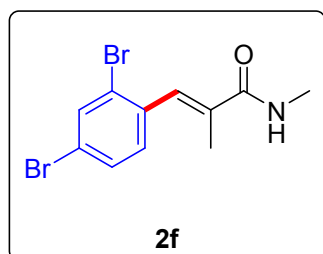

Purified by silica gel column chromatography (Petroleum ether/EtOAc = 3:1 to 1:1) as yellow solid (76 mg, 57% yield). mp: 73-75 °C.

**$^1H$  NMR (500 MHz,  $CDCl_3$ )**  $\delta$  7.75 (d,  $J$  = 1.9 Hz, 1H), 7.43 (dd,  $J_1$  = 8.2 Hz,  $J_2$  = 1.9 Hz, 1H), 7.19 (s, 1H), 7.10 (d,  $J$  = 8.2 Hz, 1H), 6.43 (d,  $J$  = 2.9 Hz, 1H), 2.93 (d,  $J$  = 4.8 Hz, 3H), 1.94 (d,  $J$  = 1.3 Hz, 3H).  **$^{13}C$  NMR (125 MHz,  $CDCl_3$ )**  $\delta$  169.3, 135.3, 134.8, 134.2, 131.6, 131.2, 130.1, 124.6, 121.8, 26.6, 14.1. **HRMS(ESI)** Calculated for  $C_{11}H_{12}ONBr_2^+$  ( $[M+H]^+$ ): 331.9280, found: 331.9286.

### (E)-3-(2-bromo-4-(trifluoromethyl)phenyl)-N,2-dimethylacrylamide (2g)

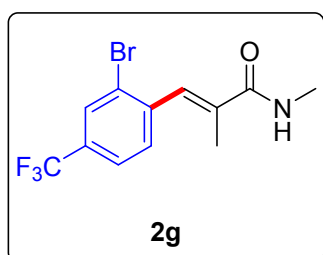

Purified by silica gel column chromatography (Petroleum ether/EtOAc = 3:1 to 1:1) as yellow solid (68 mg, 57% yield). mp: 102-104 °C.

**$^1H$  NMR (500 MHz,  $CDCl_3$ )**  $\delta$  7.86 (s, 1H), 7.57 (d,  $J$  = 8.0 Hz, 1H), 7.35 (d,  $J$  = 8.0 Hz, 1H), 7.28 (s, 1H), 6.36 (s, 1H), 2.96 (d,  $J$  = 4.8 Hz, 3H), 1.97 (d,  $J$  = 1.3 Hz, 3H).  **$^{13}C$  NMR (125 MHz,  $CDCl_3$ )**  $\delta$  169.1, 140.3, 135.3, 131.5, 131.1 (q,  $J$  = 32.5), 130.6, 129.6 (q,  $J$  = 3.8 Hz), 124.2, 122.9 (q,  $J$  = 271.3 Hz), 123.9 (q,  $J$  = 3.6 Hz), 26.7, 14.2.  **$^{19}F$  NMR (376 MHz,  $CDCl_3$ )**  $\delta$  -62.7. **HRMS(ESI)** Calculated for  $C_{12}H_{12}ONBrF_3^+$  ( $[M+H]^+$ ): 322.0054, found: 322.0057.

### (E)-3-(2-bromo-4-cyanophenyl)-N,2-dimethylacrylamide (2h)

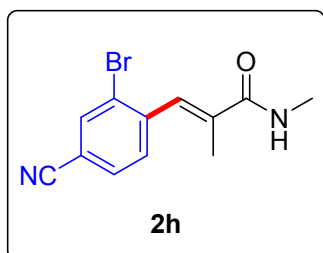

Purified by silica gel column chromatography (Petroleum ether/EtOAc = 2:1 to 1:2) as white solid (68 mg, 57% yield). mp: 132-134 °C.

**$^1H$  NMR (500 MHz,  $CDCl_3$ )**  $\delta$  7.90 (d,  $J$  = 1.5 Hz, 1H), 7.62 (dd,  $J_1$  = 8.0,  $J_2$  = 1.4 Hz, 1H), 7.36 (d,  $J$  = 8.0 Hz, 1H), 7.27 (s, 1H), 6.16 (s, 1H), 2.96 (d,  $J$  = 4.9 Hz,

3H), 1.97 (d,  $J = 1.4$  Hz, 3H).  $^{13}\text{C}$  NMR (125 MHz,  $\text{CDCl}_3$ )  $\delta$  168.8, 141.7, 136.0, 135.9, 131.3, 130.9, 130.6, 124.6, 117.1, 112.9, 26.8, 14.4. HRMS(ESI) Calculated for  $\text{C}_{12}\text{H}_{10}\text{ON}_2\text{Br}^-$  ( $[\text{M}-\text{H}]^-$ ): 276.9982, found: 276.9978.

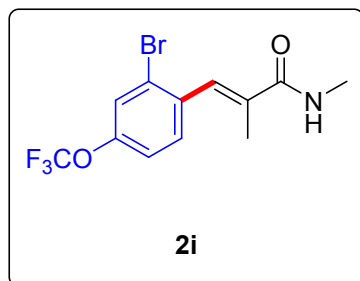

**(E)-3-(2-bromo-4-(trifluoromethoxy)phenyl)-N,2-dimethylacrylamide (2i)**

Purified by silica gel column chromatography (Petroleum ether/EtOAc = 3:1 to 1:1) as white solid (76 mg, 56% yield).

mp: 75-77 °C.

$^1\text{H}$  NMR (500 MHz,  $\text{CDCl}_3$ )  $\delta$  7.49 (d,  $J = 1.5$  Hz, 1H), 7.29-7.24 (m, 2H), 7.19 (dd,  $J_1 = 8.5$ ,  $J_2 = 1.1$  Hz, 1H), 6.36 (d,  $J = 3.2$  Hz, 1H), 2.95 (d,  $J = 4.8$  Hz, 3H), 1.97 (d,  $J = 1.4$  Hz, 3H).  $^{13}\text{C}$  NMR (125 MHz,  $\text{CDCl}_3$ )  $\delta$  169.3, 148.4 (q,  $J = 1.7$  Hz), 135.2, 134.6, 131.4, 131.1, 125.1, 124.3, 120.2 (q,  $J = 258.5$  Hz), 119.4, 26.7, 14.1.  $^{19}\text{F}$  NMR (376 MHz,  $\text{CDCl}_3$ )  $\delta$  -58.0. HRMS(ESI) Calculated for  $\text{C}_{12}\text{H}_{10}\text{O}_2\text{NBrF}_3^-$  ( $[\text{M}-\text{H}]^-$ ): 335.9847, found: 335.9858.

**(E)-3-(2-bromo-4-methylphenyl)-N,2-dimethylacrylamide (2j)**

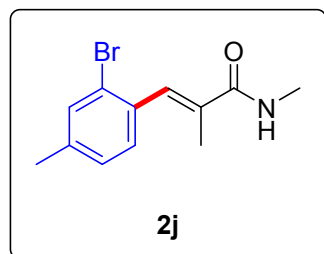

Purified by silica gel column chromatography (Petroleum ether/EtOAc = 3:1 to 1:1) as yellow oil (59 mg, 55% yield).

$^1\text{H}$  NMR (500 MHz,  $\text{CDCl}_3$ )  $\delta$  7.42 (s, 1H), 7.24 (s, 1H), 7.16-7.05 (m, 2H), 6.29 (s, 1H), 2.93 (d,  $J = 4.8$  Hz, 3H), 2.33 (s, 3H), 1.96 (d,  $J = 1.2$  Hz, 3H).  $^{13}\text{C}$  NMR (126 MHz,  $\text{CDCl}_3$ )  $\delta$  169.9, 139.4, 133.4, 133.3, 133.0, 132.5, 130.1, 127.7, 123.9, 26.6, 20.7, 14.1. HRMS(ESI) Calculated for  $\text{C}_{12}\text{H}_{15}\text{ONBr}^+$  ( $[\text{M}+\text{H}]^+$ ): 268.0032, found: 268.0037.

**(E)-3-(2-bromo-5-methylphenyl)-N,2-dimethylacrylamide (2k)**

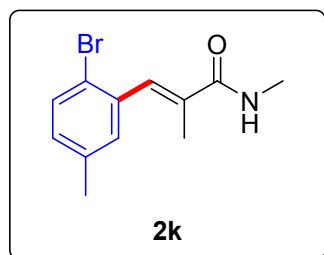

Purified by silica gel column chromatography (Petroleum ether/EtOAc = 3:1 to 1:1) as white solid (61 mg, 57% yield). mp: 120-122 °C.

$^1\text{H}$  NMR (500 MHz,  $\text{CDCl}_3$ )  $\delta$  7.44 (d,  $J = 8.1$  Hz, 1H), 7.24 (s, 1H), 7.03 (d,  $J = 0.9$  Hz, 1H), 6.96 (d,  $J = 8.1$  Hz, 1H), 6.39 (s, 1H), 2.93 (d,  $J = 4.8$  Hz, 3H), 2.29

(s, 3H), 1.96 (d,  $J = 1.3$  Hz, 3H).  $^{13}\text{C}$  NMR (126 MHz,  $\text{CDCl}_3$ )  $\delta$  169.7, 136.7, 136.0, 133.5, 132.7, 132.2, 130.9, 129.9, 120.5, 26.6, 20.8, 14.1. HRMS(ESI) Calculated for  $\text{C}_{12}\text{H}_{15}\text{ONBr}^+$  ( $[\text{M}+\text{H}]^+$ ): 268.0032, found: 268.0032.

### (E)-3-(2,4-dichlorophenyl)-N,2-dimethylacrylamide (2l)

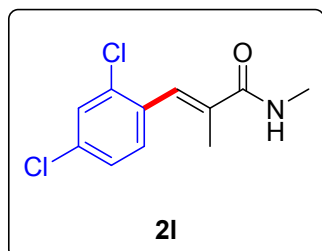

Purified by silica gel column chromatography (Petroleum ether/EtOAc = 3:1 to 1:1) as white solid (42 mg, 43% yield). mp: 76-78 °C.

$^1\text{H}$  NMR (500 MHz,  $\text{CDCl}_3$ )  $\delta$  7.42 (d,  $J = 2.0$  Hz, 1H), 7.27-7.23 (m, 2H), 7.19 (d,  $J = 8.3$  Hz, 1H), 6.23 (s, 1H), 2.94 (d,  $J = 4.8$  Hz, 3H), 1.97 (d,  $J = 1.4$  Hz, 3H).  $^{13}\text{C}$  NMR (126 MHz,  $\text{CDCl}_3$ )  $\delta$  169.4, 134.7, 134.6, 134.1, 133.1, 131.1, 129.4, 129.3, 126.7, 26.7, 14.3. HRMS(ESI) Calculated for  $\text{C}_{11}\text{H}_{12}\text{ONCl}_2^+$  ( $[\text{M}+\text{H}]^+$ ): 244.0291, found: 244.0297.

### (E)-3-(4-bromo-2-chlorophenyl)-N,2-dimethylacrylamide (2m)

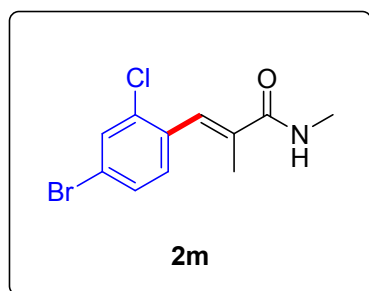

Purified by silica gel column chromatography (Petroleum ether/EtOAc = 3:1 to 1:1) as yellow solid (74 mg, 64% yield). mp: 79-81 °C.

$^1\text{H}$  NMR (500 MHz,  $\text{CDCl}_3$ )  $\delta$  7.57 (d,  $J = 1.9$  Hz, 1H), 7.39 (dd,  $J_1 = 8.3$ ,  $J_2 = 1.9$  Hz, 1H), 7.24 (s, 1H), 7.12 (d,  $J = 8.3$  Hz, 1H), 6.26 (s, 1H), 2.94 (d,  $J = 4.8$  Hz, 3H), 1.96 (d,  $J = 1.4$  Hz, 3H).  $^{13}\text{C}$  NMR (125 MHz,  $\text{CDCl}_3$ )  $\delta$  169.4, 134.7, 134.6, 133.5, 132.0, 131.3, 129.6, 129.4, 121.7, 26.7, 14.2. HRMS(ESI) Calculated for  $\text{C}_{11}\text{H}_{12}\text{ONBrCl}^+$  ( $[\text{M}+\text{H}]^+$ ): 287.9785, found: 287.9791.

### (E)-N,2-dimethyl-3-(2-(4-methylquinolin-2-yl)phenyl)acrylamide (2n)

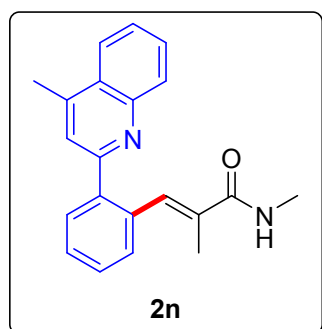

Purified by silica gel column chromatography (Petroleum ether/EtOAc = 3:1 to 1:1) as white solid (95 mg, 75% yield). mp: 104-106 °C.

$^1\text{H}$  NMR (500 MHz,  $\text{CDCl}_3$ )  $\delta$  8.07 (d,  $J = 8.4$  Hz, 1H), 7.96 (d,  $J = 8.3$  Hz, 1H), 7.74-7.65 (m, 2H), 7.58-7.52 (m, 1H), 7.45-7.38 (m, 2H),

7.34 (s, 1H), 7.33-7.29 (m, 1H), 7.26 (s, 1H), 6.21 (s, 1H), 2.79 (d,  $J = 4.8$  Hz, 3H), 2.69 (s, 3H), 1.94 (s, 3H).  $^{13}\text{C}$  NMR (125 MHz,  $\text{CDCl}_3$ )  $\delta$  170.2, 158.5, 147.6, 144.2, 140.2, 134.7, 132.7, 132.7, 129.9, 129.7, 129.6, 129.3, 128.2, 127.9, 126.8, 126.2, 123.7, 123.1, 26.4, 18.7, 14.2. HRMS(ESI) Calculated for  $\text{C}_{21}\text{H}_{21}\text{ON}_2^+$  ( $[\text{M}+\text{H}]^+$ ): 317.1648, found: 317.1654.

### (E)-N,2-dimethyl-3-(naphthalen-1-yl)acrylamide (2o)

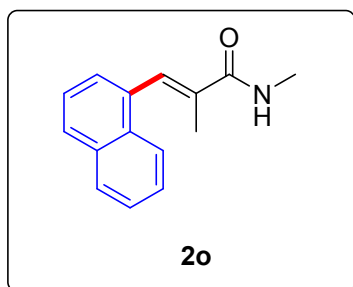

Purified by silica gel column chromatography (Petroleum ether/EtOAc = 3:1 to 1:1) as colorless oil (76 mg, 84% yield).

$^1\text{H}$  NMR (500 MHz,  $\text{CDCl}_3$ )  $\delta$  7.93-7.88 (m, 1H), 7.88-7.82 (m, 2H), 7.79 (d,  $J = 8.2$  Hz, 1H), 7.52-7.42 (m, 3H), 7.30 (d,  $J = 7.0$  Hz, 1H), 6.21 (s, 1H), 2.98 (d,  $J = 4.8$  Hz, 3H), 1.95 (d,  $J = 1.4$  Hz, 3H).  $^{13}\text{C}$  NMR (125 MHz,  $\text{CDCl}_3$ )  $\delta$  169.7, 133.7, 133.5, 133.4, 132.5, 131.5, 128.4, 128.1, 126.4, 126.1, 126.0, 125.1, 124.8, 26.7, 14.3. HRMS(ESI) Calculated for  $\text{C}_{15}\text{H}_{16}\text{ON}^+$  ( $[\text{M}+\text{H}]^+$ ): 226.1226, found: 226.1231.

### (E)-3-(5-bromonaphthalen-1-yl)-N,2-dimethylacrylamide (2p)

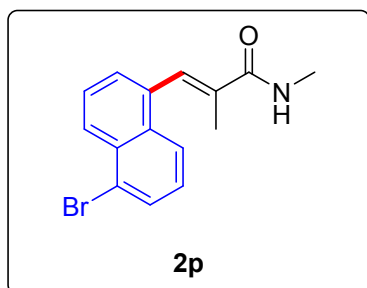

Purified by silica gel column chromatography (Petroleum ether/EtOAc = 3:1 to 1:1) as yellow solid (90 mg, 74% yield). mp: 93-95 °C.

$^1\text{H}$  NMR (500 MHz,  $\text{CDCl}_3$ )  $\delta$  8.21 (d,  $J = 8.6$  Hz, 1H), 7.87-7.76 (m, 3H), 7.57-7.51 (m, 1H), 7.35-7.24 (m, 2H), 6.28 (s, 1H), 2.98 (d,  $J = 4.8$  Hz, 3H), 1.92 (d,  $J = 1.4$  Hz, 3H).  $^{13}\text{C}$  NMR (125 MHz,  $\text{CDCl}_3$ )  $\delta$  169.4, 134.1, 133.9, 132.7, 132.1, 131.9, 130.1, 127.2, 127.2, 126.4, 126.3, 124.7, 123.3, 26.7, 14.2. HRMS(ESI) Calculated for  $\text{C}_{15}\text{H}_{15}\text{ONBr}^+$  ( $[\text{M}+\text{H}]^+$ ): 304.0332, found: 304.0337.

### (E)-N,2-dimethyl-3-(naphthalen-2-yl)acrylamide (2q)

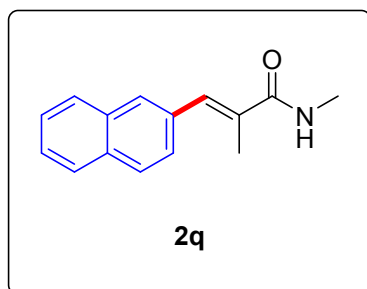

Purified by silica gel column chromatography (Petroleum ether/EtOAc = 3:1 to 1:1) as white solid (33 mg, 36% yield). mp: 111-113 °C.

**<sup>1</sup>H NMR (500 MHz, CDCl<sub>3</sub>)** δ 7.87-7.81 (m, 3H), 7.80 (s, 1H), 7.54-7.48 (m, 3H), 7.47-7.43 (m, 1H), 6.03 (s, 1H), 2.98 (d, *J* = 4.8 Hz, 3H), 2.19 (d, *J* = 1.3 Hz, 3H). **<sup>13</sup>C NMR (125 MHz, CDCl<sub>3</sub>)** δ 170.3, 133.8, 133.7, 133.2, 132.7, 132.3, 128.6, 128.1, 127.9, 127.7, 127.0, 126.4, 126.4, 26.8, 14.4. **HRMS(ESI)** Calculated for C<sub>15</sub>H<sub>16</sub>ON<sup>+</sup> ([M+H]<sup>+</sup>): 226.1226, found: 226.1231.

**(E)-N,2-dimethyl-3-(pyridin-2-yl)acrylamide (2r)**

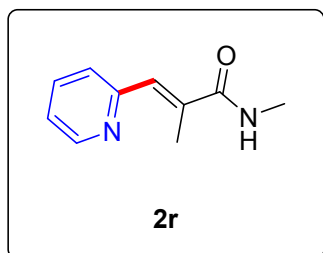

Purified by silica gel column chromatography (Petroleum ether/EtOAc = 3:1 to 1:1) as yellow oil (37 mg, 52% yield).

**<sup>1</sup>H NMR (500 MHz, CDCl<sub>3</sub>)** δ 8.64-8.61 (m, 1H), 7.71-7.65 (m, 1H), 7.31 (d, *J* = 7.9 Hz, 1H), 7.28 (d, *J* = 1.1 Hz, 1H), 7.20-7.14 (m, 1H), 6.49 (s, 1H), 2.93 (d, *J* = 4.8 Hz, 3H), 2.33 (d, *J* = 1.3 Hz, 3H). **<sup>13</sup>C NMR (125 MHz, CDCl<sub>3</sub>)** δ 170.2, 155.3, 149.1, 136.1, 135.7, 131.6, 125.3, 122.0, 26.6, 14.2. **HRMS(ESI)** Calculated for C<sub>11</sub>H<sub>12</sub>ON<sub>2</sub>Na<sup>+</sup> ([M+Na]<sup>+</sup>): 199.0842, found: 199.0847.

**(E)-N-methyl-3-(naphthalen-1-yl)-2-phenylacrylamide (2s)**

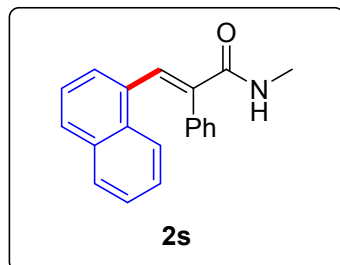

Purified by silica gel column chromatography (Petroleum ether/EtOAc = 3:1 to 1:1) as yellow solid (17 mg, 15% yield). mp: 148-150 °C.

**<sup>1</sup>H NMR (500 MHz, CDCl<sub>3</sub>)** δ 8.47 (s, 1H), 8.15 (d, *J* = 8.3 Hz, 1H), 7.78 (d, *J* = 7.7 Hz, 1H), 7.64 (d, *J* = 8.2 Hz, 1H), 7.56-7.42 (m, 2H), 7.26-7.23 (m, 3H), 7.16-7.12 (m, 2H), 7.11-7.07 (m, 1H), 6.88 (d, *J* = 7.2 Hz, 1H), 5.66 (s, 1H), 2.89 (d, *J* = 4.9 Hz, 3H). **<sup>13</sup>C NMR (125 MHz, CDCl<sub>3</sub>)** δ 167.6, 137.1, 135.7, 135.2, 133.2, 132.6, 132.1, 130.1, 128.8, 128.4, 128.2, 128.1, 127.4, 126.2, 125.8, 124.9, 124.3, 26.8. **HRMS(ESI)** Calculated for C<sub>20</sub>H<sub>17</sub>ONNa<sup>+</sup> ([M+Na]<sup>+</sup>): 310.1202, found: 310.1206.



### 3.3 Gram-scale reaction

#### Experimental procedure:

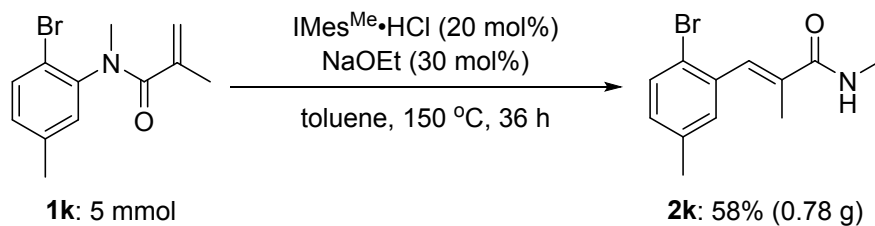

To a 250 ml flame-dried Schlenk tube containing a stirring bar was added  $\text{IMes}^{\text{Me}}\cdot\text{HCl}$  (1 mmol, 370 mg), NaOEt (1.05 mmol, 71.4 mg), N-(2-bromo-5-methylphenyl)-N-methylmethacrylamide **1k** (5 mmol, 1335 mg) and toluene (12.5 mL) sequentially under nitrogen. The tube was sealed and stirred at 150 °C for 36 h. After completion, the reaction mixture was extracted with ethyl acetate. Then, the solvent was removed under vacuum and the residue was purified by silica gel column chromatography (Petroleum ether/EtOAc = 3:1 to 1:1) to provide the product **2k** in 58% yield (0.78g, off white solid).

## 4. Mechanistic Experiments

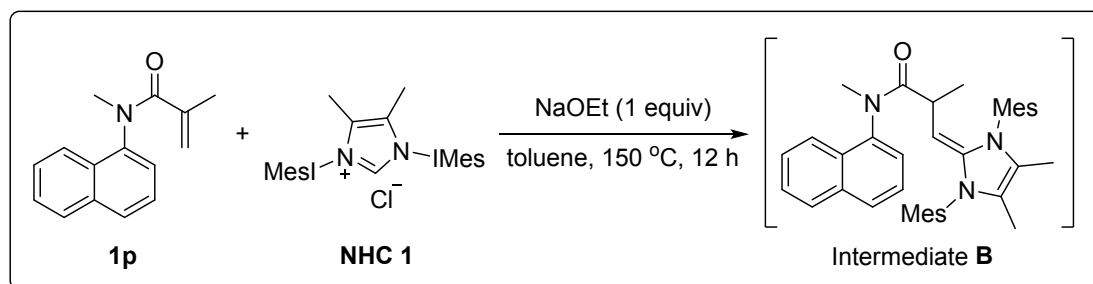

To a 25 ml flame-dried Schlenk tube containing a stirring bar was added IMes<sup>Me</sup>·HCl (0.2 mmol, 74 mg), NaOEt (0.2 mmol, 13.6 mg), toluene (1 mL) and N-methyl-N-(naphthalen-1-yl)methacrylamide (0.2 mmol, 45 mg) sequentially under nitrogen. The tube was sealed and stirred at 150 °C for 12 h. After completion, the reaction mixture was directly analyzed by HRMS and the possible intermediate **B** was detected which might be involved in the catalytic cycle.

**HRMS(ESI)** Calculated for C<sub>38</sub>H<sub>44</sub>ON<sub>3</sub><sup>+</sup> ([M+H]<sup>+</sup>): 558.3479, found: 558.3474.

HRMS (ESI) spectra for the intermediate **B**

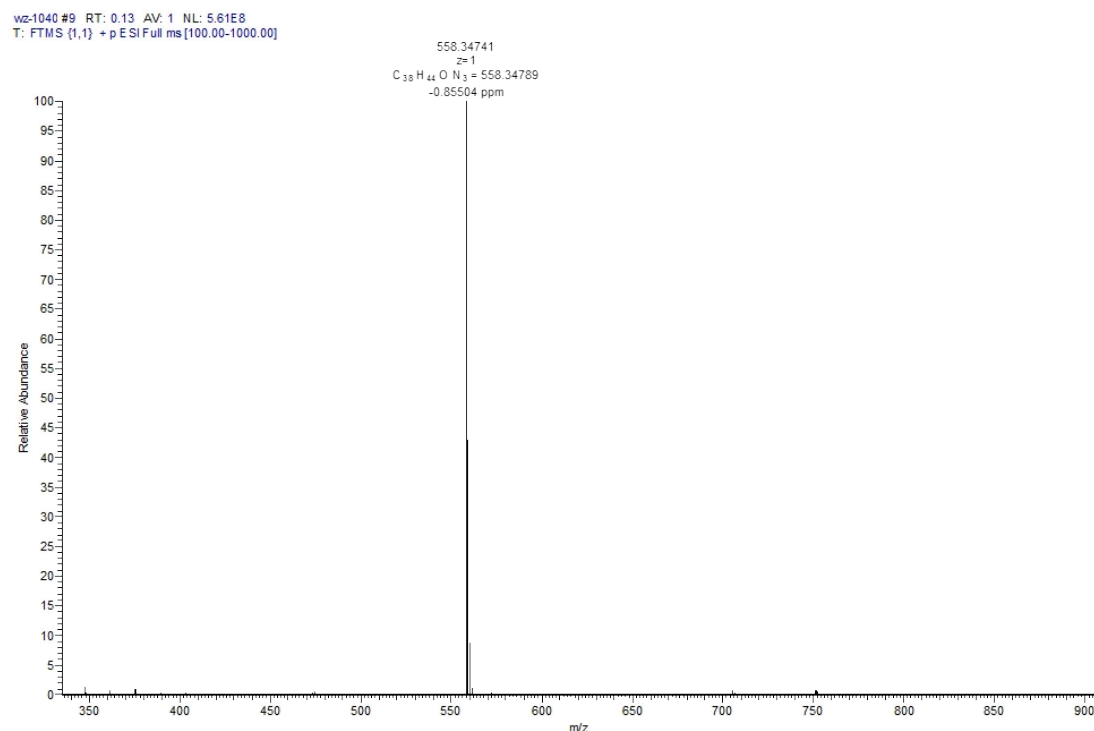

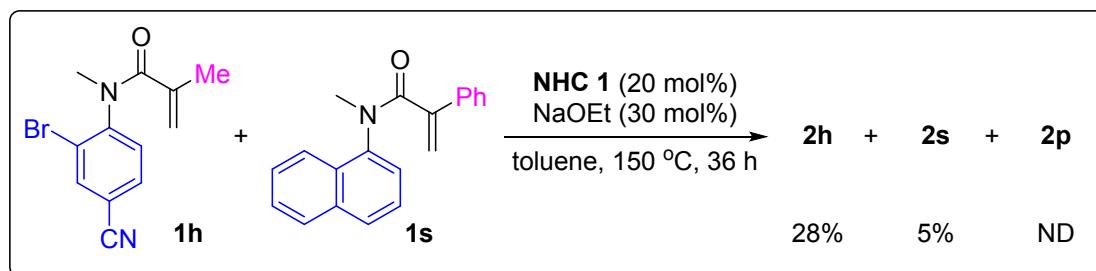

To a 25 ml flame-dried Schlenk tube containing a stirring bar was added **NHC 1** (0.08 mmol, 29.4 mg), NaOEt (0.12 mmol, 8.2 mg), toluene (1 mL), N-(2-bromo-4-cyanophenyl)-N-methylmethacrylamide **1h** (0.2 mmol, 55.6 mg), and N-methyl-N-(naphthalen-1-yl)-2-phenylacrylamide **1s** (0.2 mmol, 57.4 mg) sequentially under nitrogen. The tube was sealed and stirred at 150 °C for 36 h. After completion, the reaction mixture was diluted with ethyl acetate (5.0 mL) and filtered through a short pad silica gel washing with ethyl acetate (20 mL). The filtrate was concentrated and purified by silica gel column chromatography to provide the products **2h** and **2s** in 28% and 5% yields respectively. However, the cross product **2p** failed to be detected.

## 5. X-Ray Crystallography Data for 2e

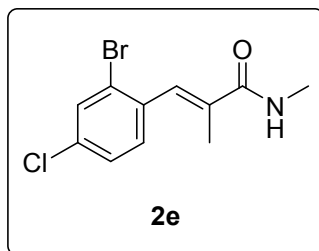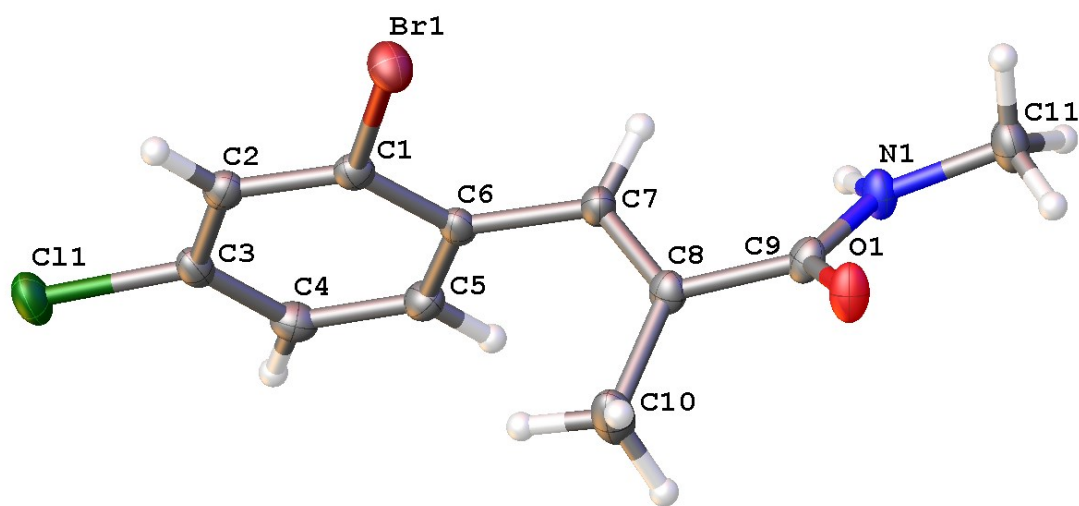

Table 1. Crystal data and structure refinement for **2e**.

|                                 |                                           |          |
|---------------------------------|-------------------------------------------|----------|
| Identification code             | 2e                                        |          |
| Empirical formula               | C <sub>11</sub> H <sub>11</sub> Br Cl N O |          |
| Formula weight                  | 288.57                                    |          |
| Temperature                     | 173.0 K                                   |          |
| Wavelength                      | 1.34139 Å                                 |          |
| Crystal system                  | Orthorhombic                              |          |
| Space group                     | Pca2 <sub>1</sub>                         |          |
| Unit cell dimensions            | a = 9.7336(5) Å                           | α = 90°. |
|                                 | b = 9.4426(5) Å                           | β = 90°. |
|                                 | c = 12.9051(8) Å                          | γ = 90°. |
| Volume                          | 1186.11(11) Å <sup>3</sup>                |          |
| Z                               | 4                                         |          |
| Density (calculated)            | 1.616 Mg/m <sup>3</sup>                   |          |
| Absorption coefficient          | 4.460 mm <sup>-1</sup>                    |          |
| F(000)                          | 576                                       |          |
| Crystal size                    | 0.06 x 0.05 x 0.02 mm <sup>3</sup>        |          |
| Theta range for data collection | 5.679 to 54.844°.                         |          |

|                                   |                                             |
|-----------------------------------|---------------------------------------------|
| Index ranges                      | -10<=h<=11, -11<=k<=6, -15<=l<=15           |
| Reflections collected             | 5057                                        |
| Independent reflections           | 1866 [R(int) = 0.0383]                      |
| Completeness to theta = 53.594°   | 98.3 %                                      |
| Absorption correction             | Semi-empirical from equivalents             |
| Max. and min. transmission        | 0.7508 and 0.4809                           |
| Refinement method                 | Full-matrix least-squares on F <sup>2</sup> |
| Data / restraints / parameters    | 1866 / 1 / 138                              |
| Goodness-of-fit on F <sup>2</sup> | 1.044                                       |
| Final R indices [I>2sigma(I)]     | R1 = 0.0278, wR2 = 0.0697                   |
| R indices (all data)              | R1 = 0.0283, wR2 = 0.0702                   |
| Absolute structure parameter      | 0.05(2)                                     |
| Extinction coefficient            | n/a                                         |
| Largest diff. peak and hole       | 0.315 and -0.431 e.Å <sup>-3</sup>          |

## 6. References

- [1] Y. Ping, K. Wang, Q. Pan, Z. Ding, Z. Zhou, Y. Guo and W. Kong, *ACS Catal.* 2019, **9**, 7335.
- [2] V. G. Correia, J. C. Abreu, C. A. E. Barata and L. H. Andrade, *Org. Lett.* 2017, **19**, 1060.
- [3] X. Yi, S. Lei, W. Liu, F. Che, C. Yu, X. Liu, Z. Wang, X. Zhou and Y. Zhang, *Org. Lett.* 2020, **22**, 4583.
- [4] X. Liu, B. Li and Z. Gu, *J. Org. Chem.* 2015, **80**, 7547.
- [5] J. Zhao, P. Li, Y. Xu, Y. Shi and F. Li, *Org. Lett.* 2019, **21**, 9386.
- [6] M.-Z. Zhang, X. Wang, M.-Y. Gong, L. Chen, W.-B. Shi, S.-H. He, Y. Jiang and T. Chen, *Org. Biomol. Chem.* 2018, **16**, 5197.
- [7] W. Kong, M. Casimiro, N. Fuentes, E. Merino and C. Nevado, *Angew. Chem. Int. Ed.* 2013, **52**, 13086.
- [8] (a) Y.-L. Li, J.-B. Wang, X.-L. Wang, Y. Cao and J. Deng, *Eur. J. Org. Chem.* 2017, 6052. (b) D. B. Bagal, S.-W. Park, H.-J. Song and S. Chang, *Chem. Commun.* 2017, **53**, 8798.

## 7. $^1\text{H}$ , $^{13}\text{C}$ and $^{19}\text{F}$ NMR Spectra

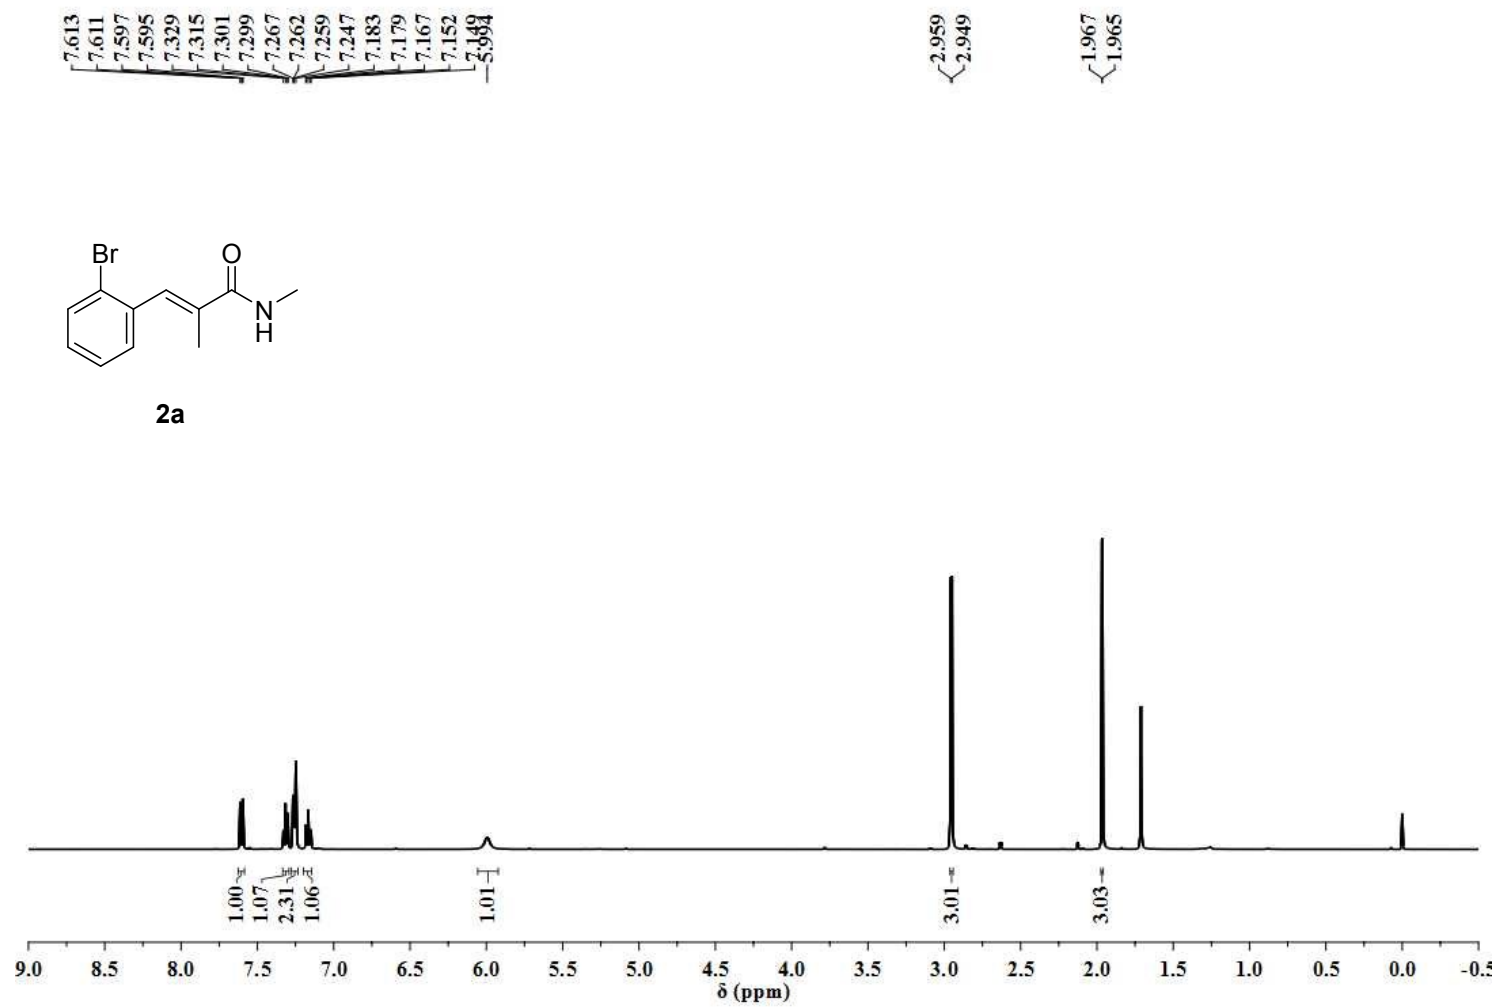

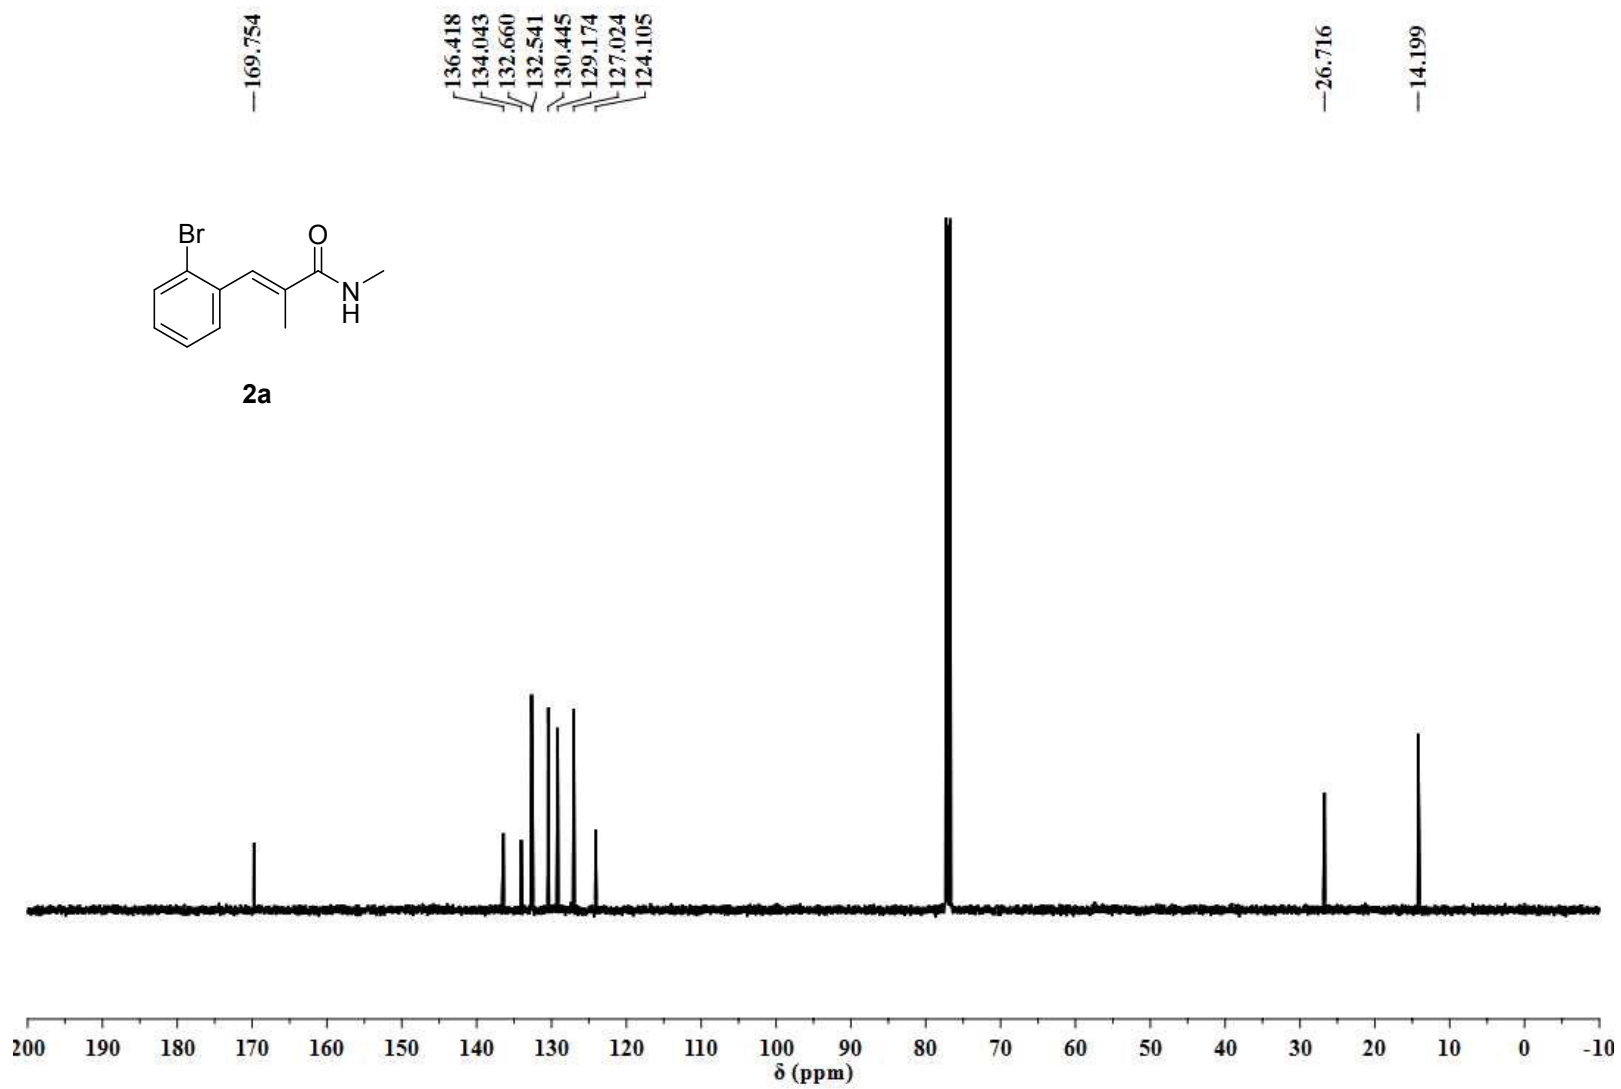



7.284  
7.281  
7.276  
7.273  
7.269

6.014

2.965  
2.955

1.995  
1.992

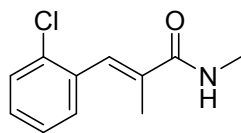

2b

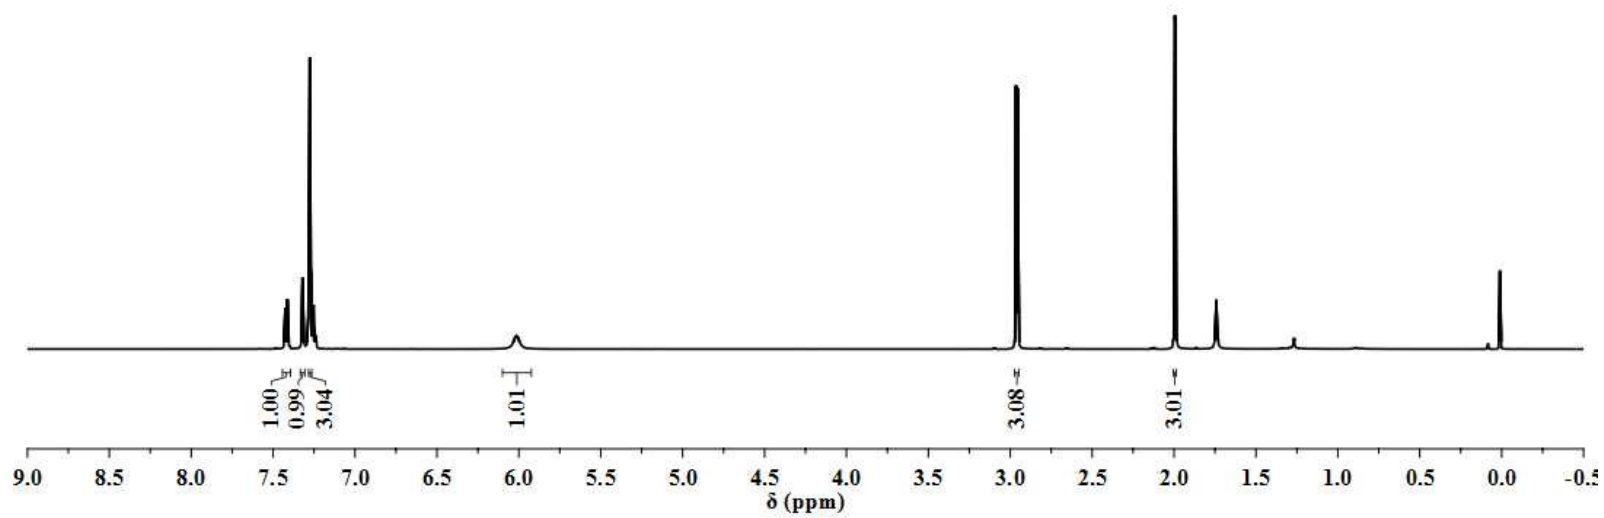

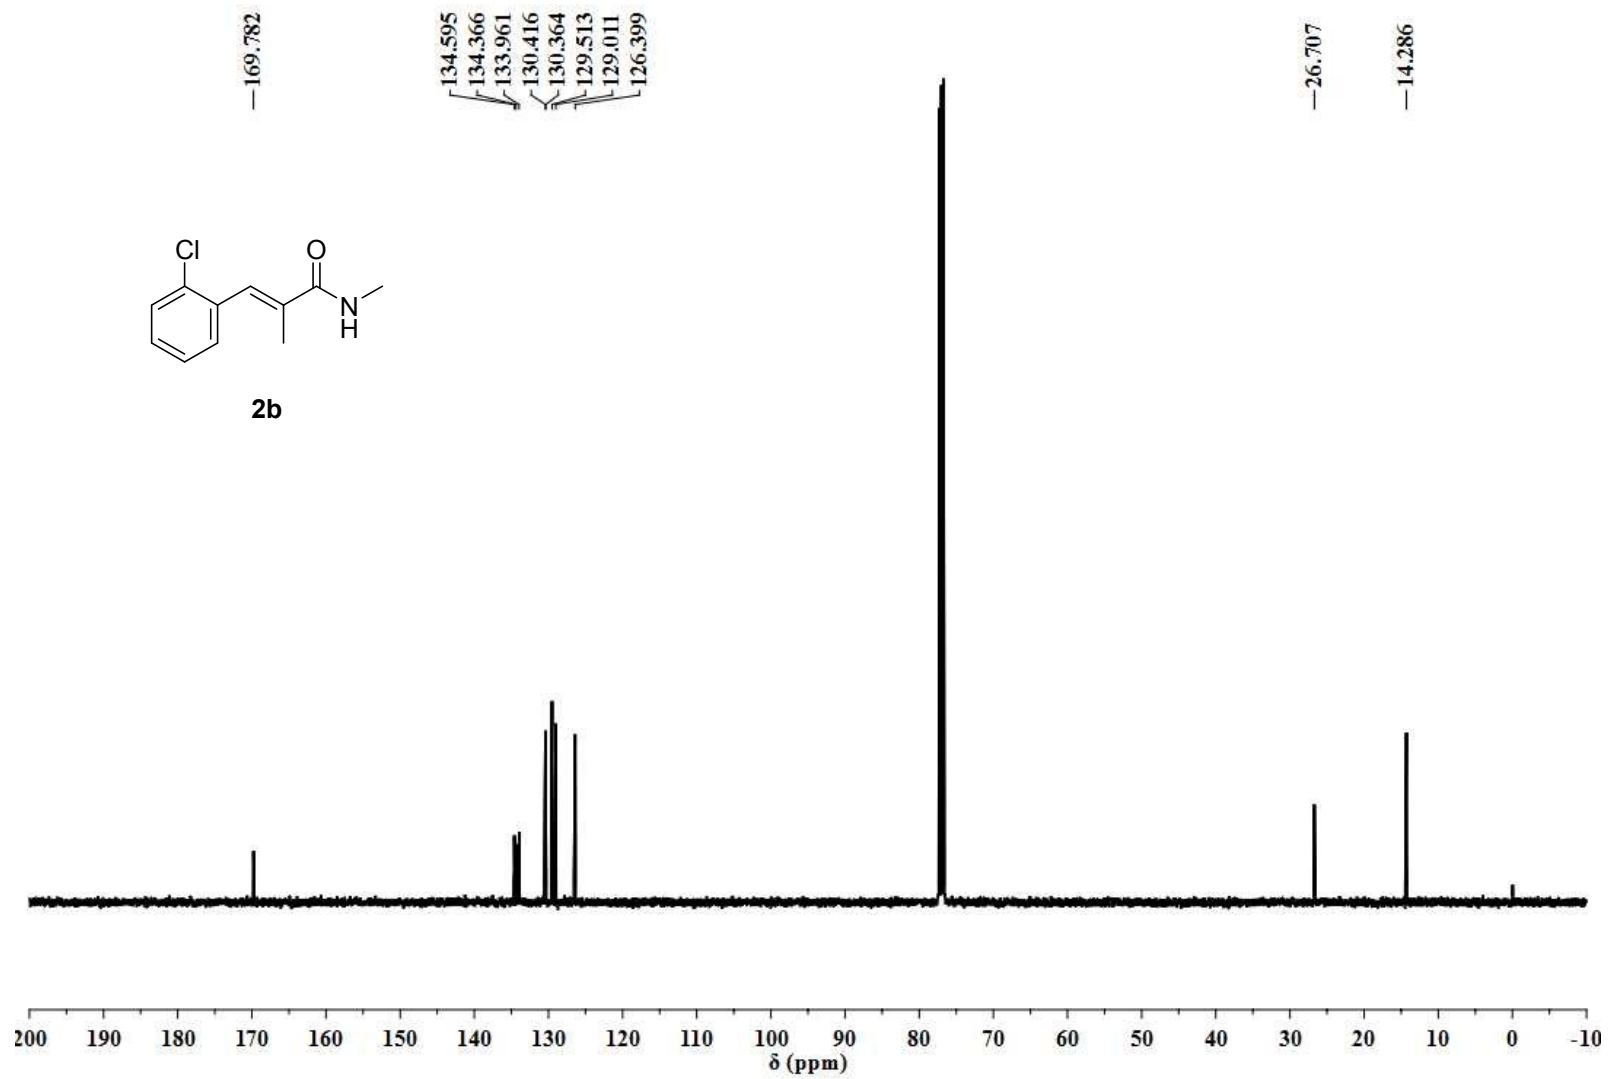

7.681  
7.665  
7.541  
7.526  
7.511  
7.410  
7.396  
7.380  
7.276

-6.164

2.934  
2.924

1.881  
1.879

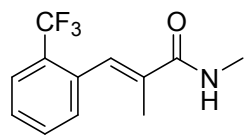

2c

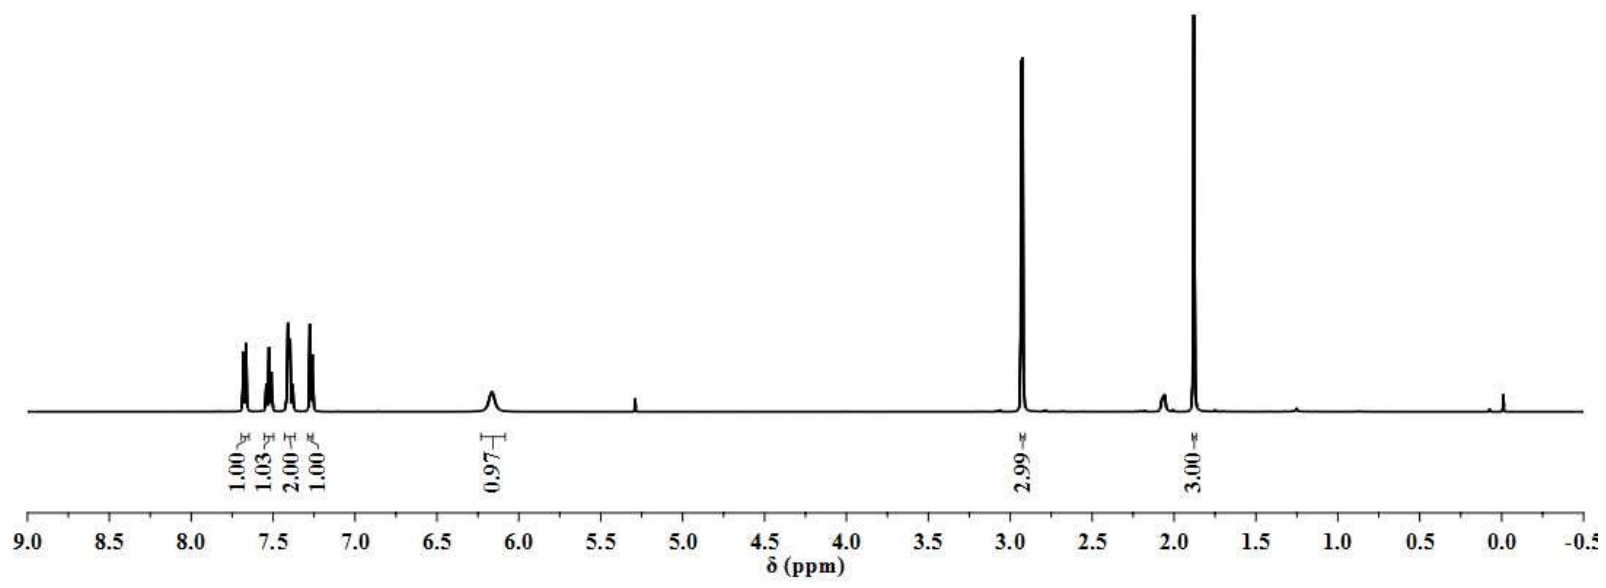

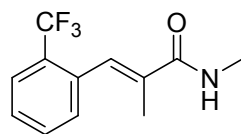

2c

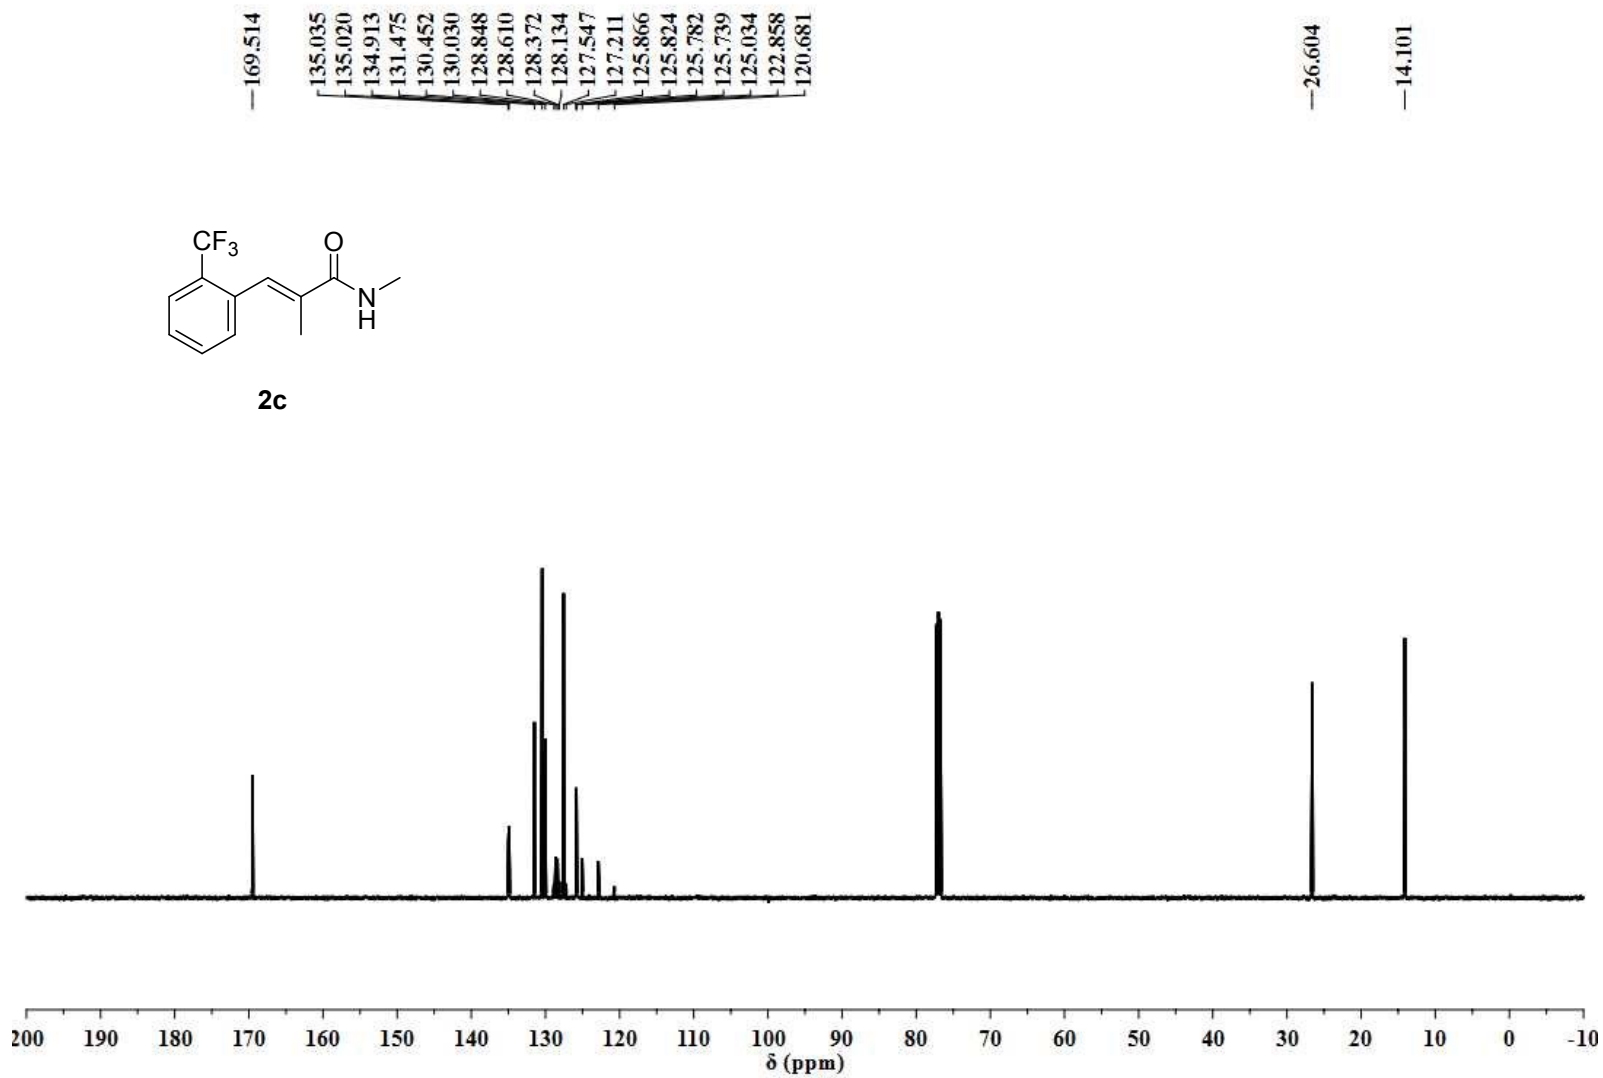

ZBW-WZ-850-F

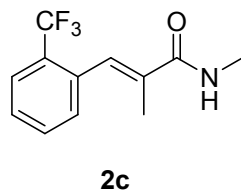

---60.78

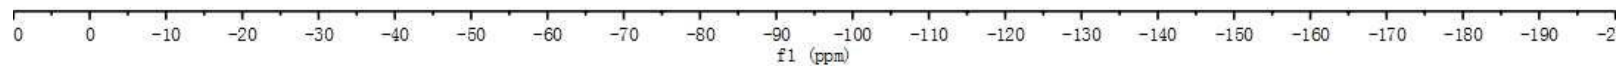

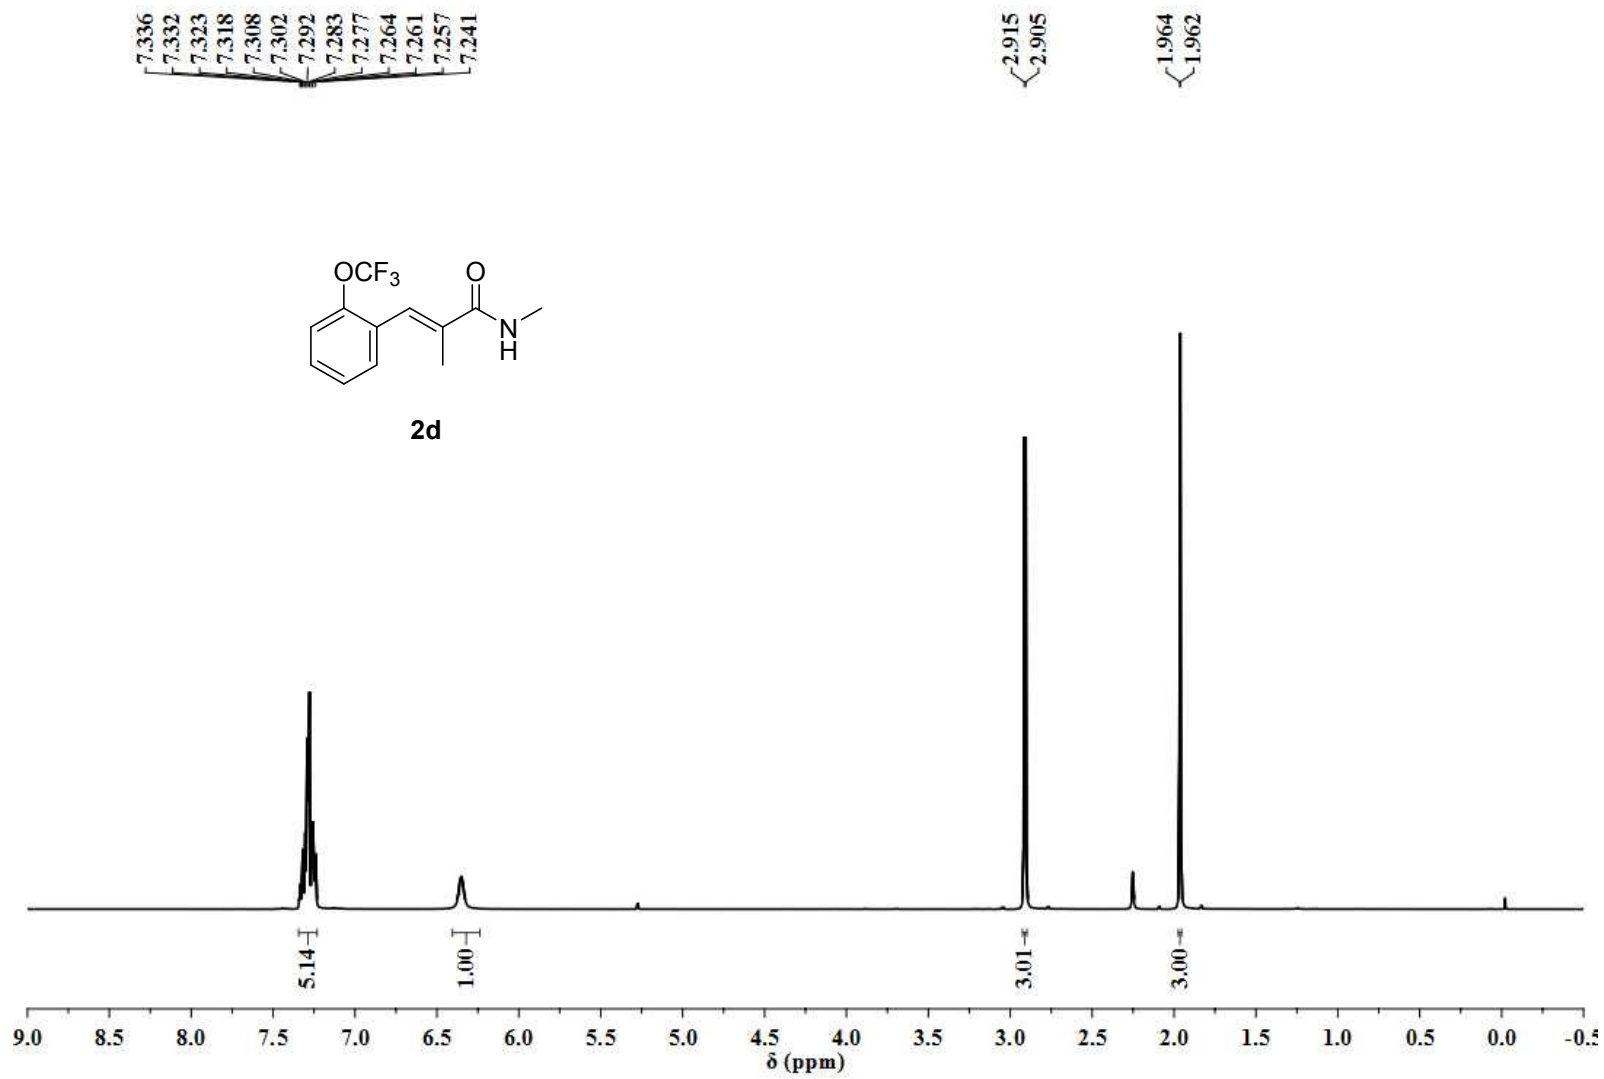

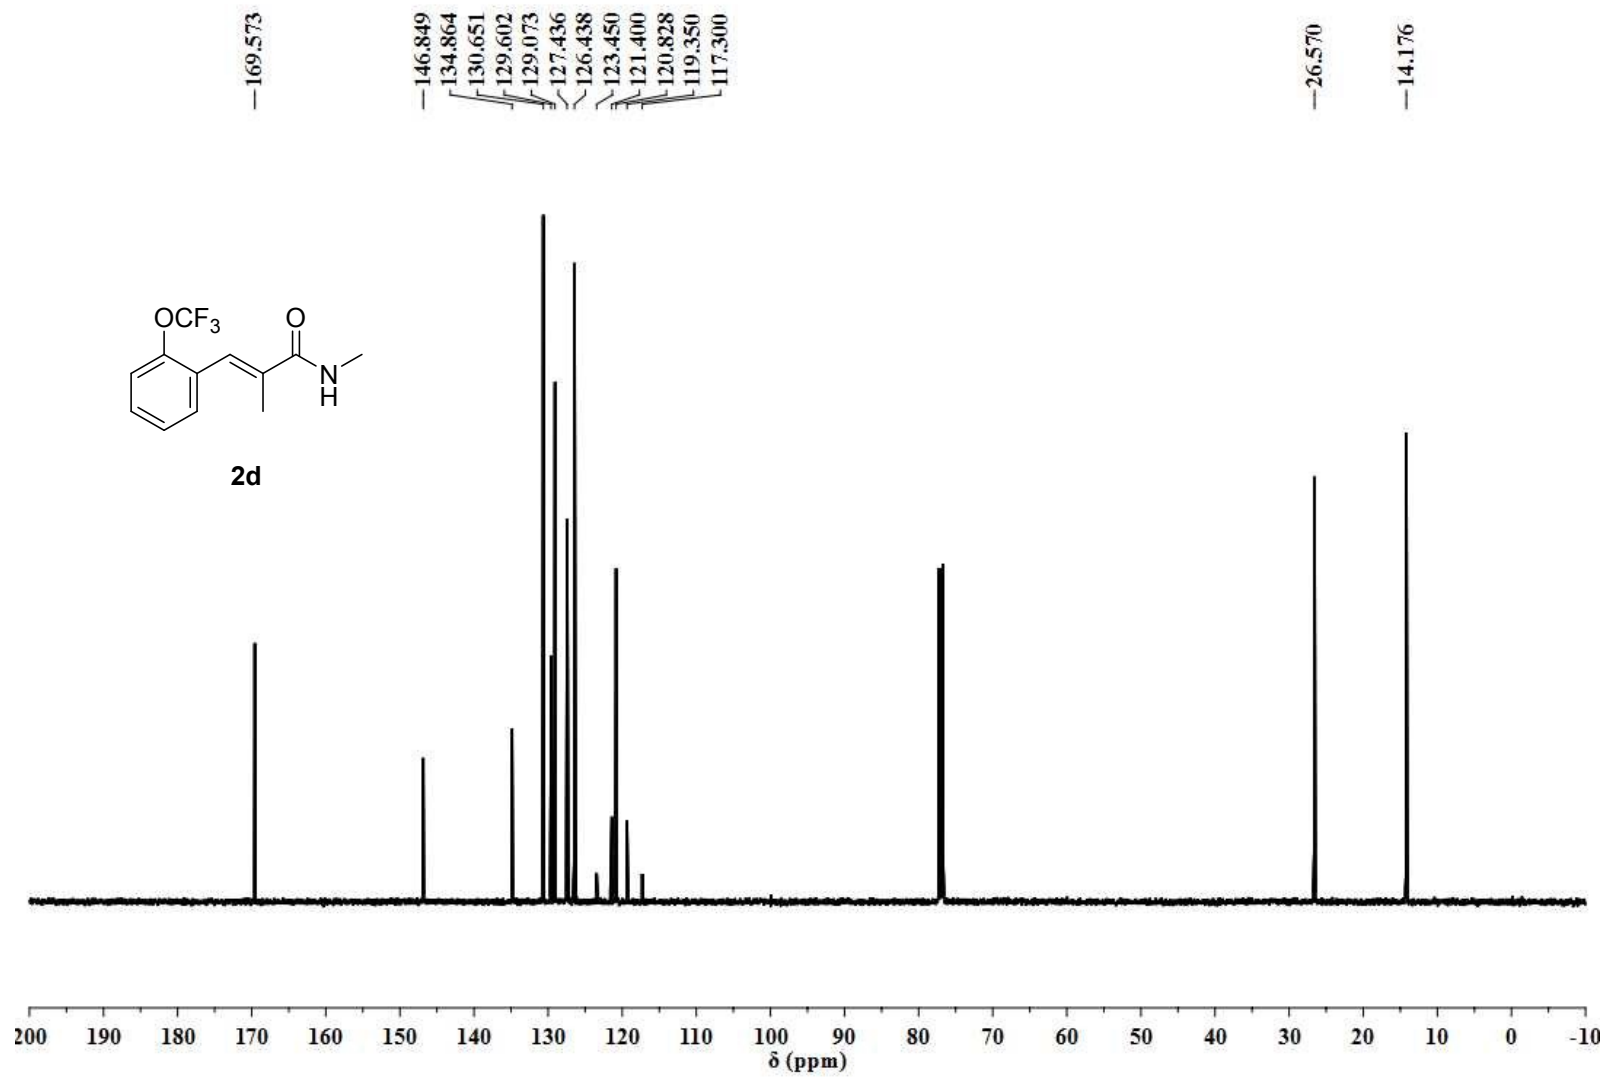

ZBW-WZ-854-F

57.37

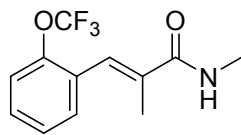

**2d**

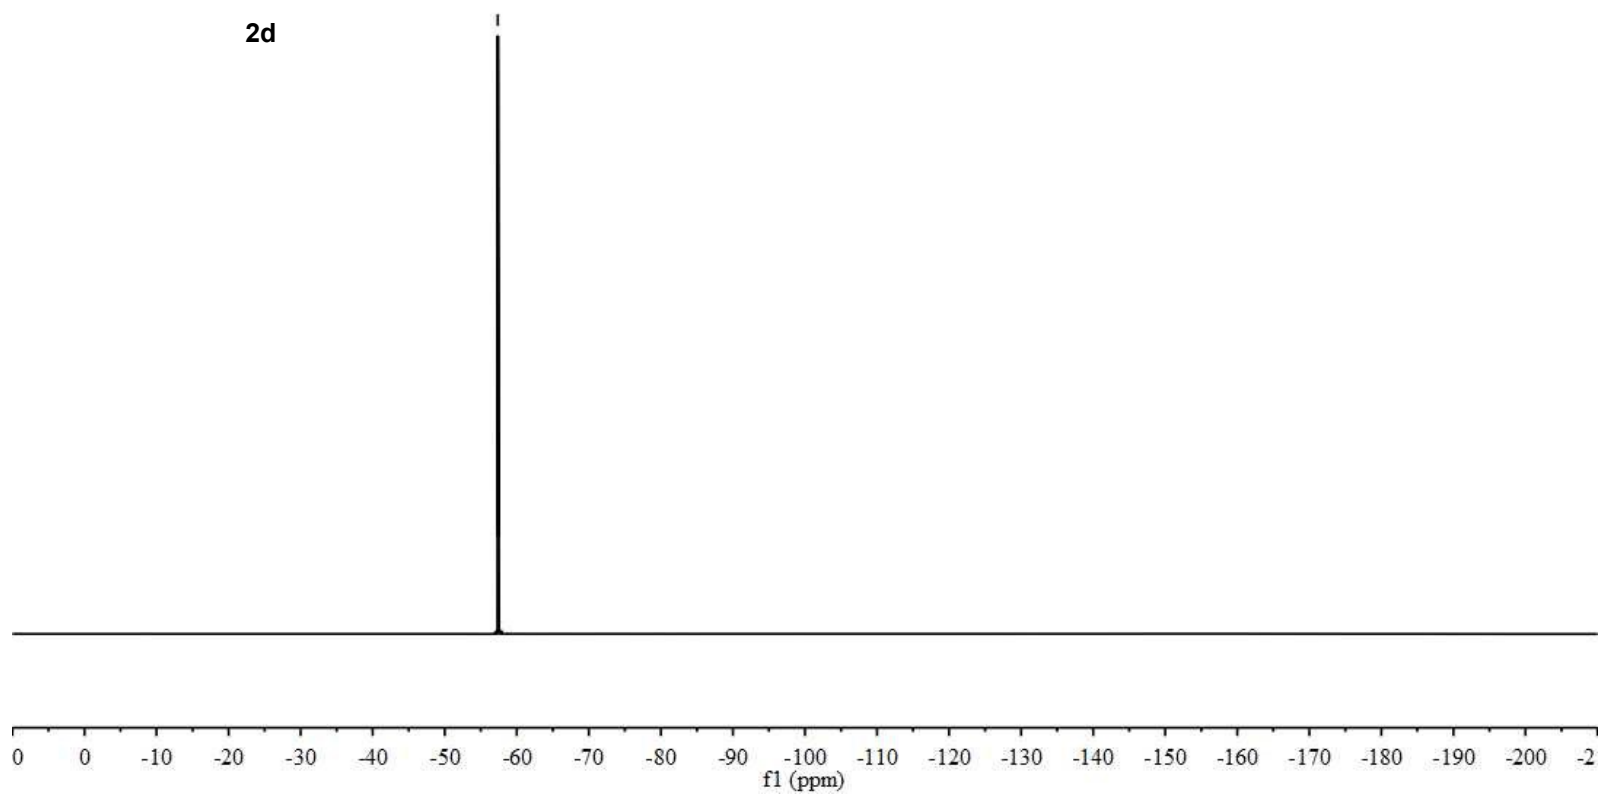



7.610  
7.606  
7.302  
7.298  
7.283

6.201

2.947  
2.937

1.949  
1.947

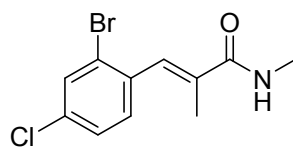

**2e**

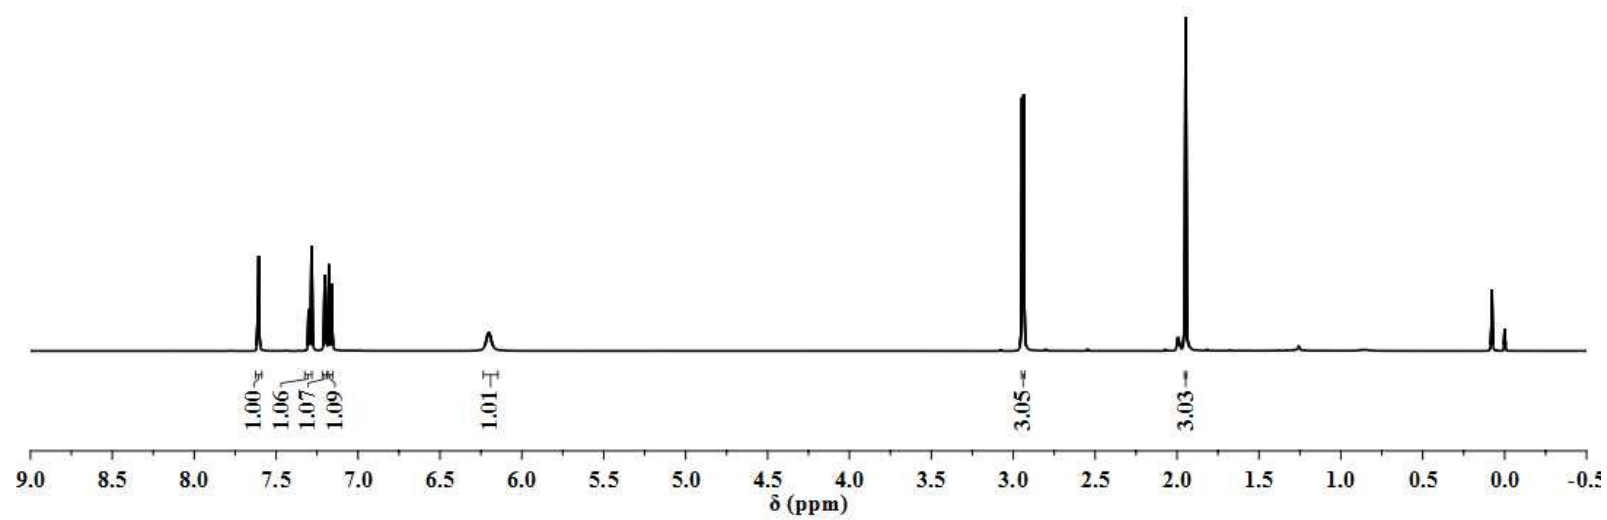

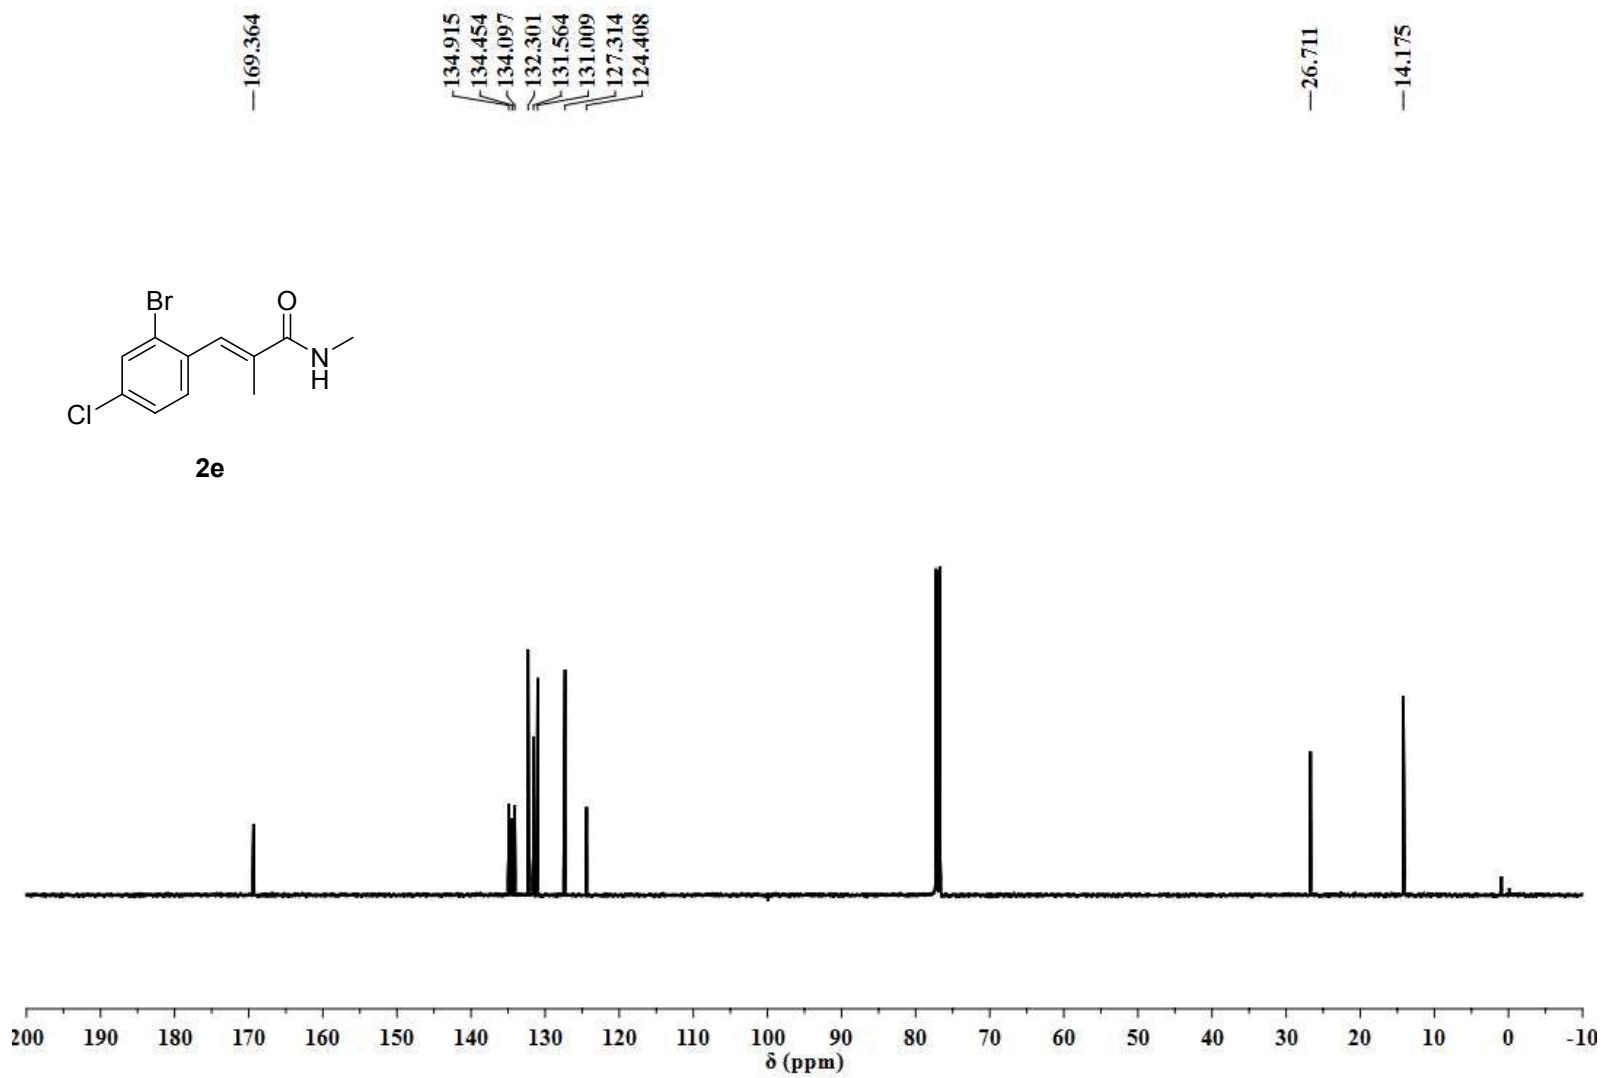

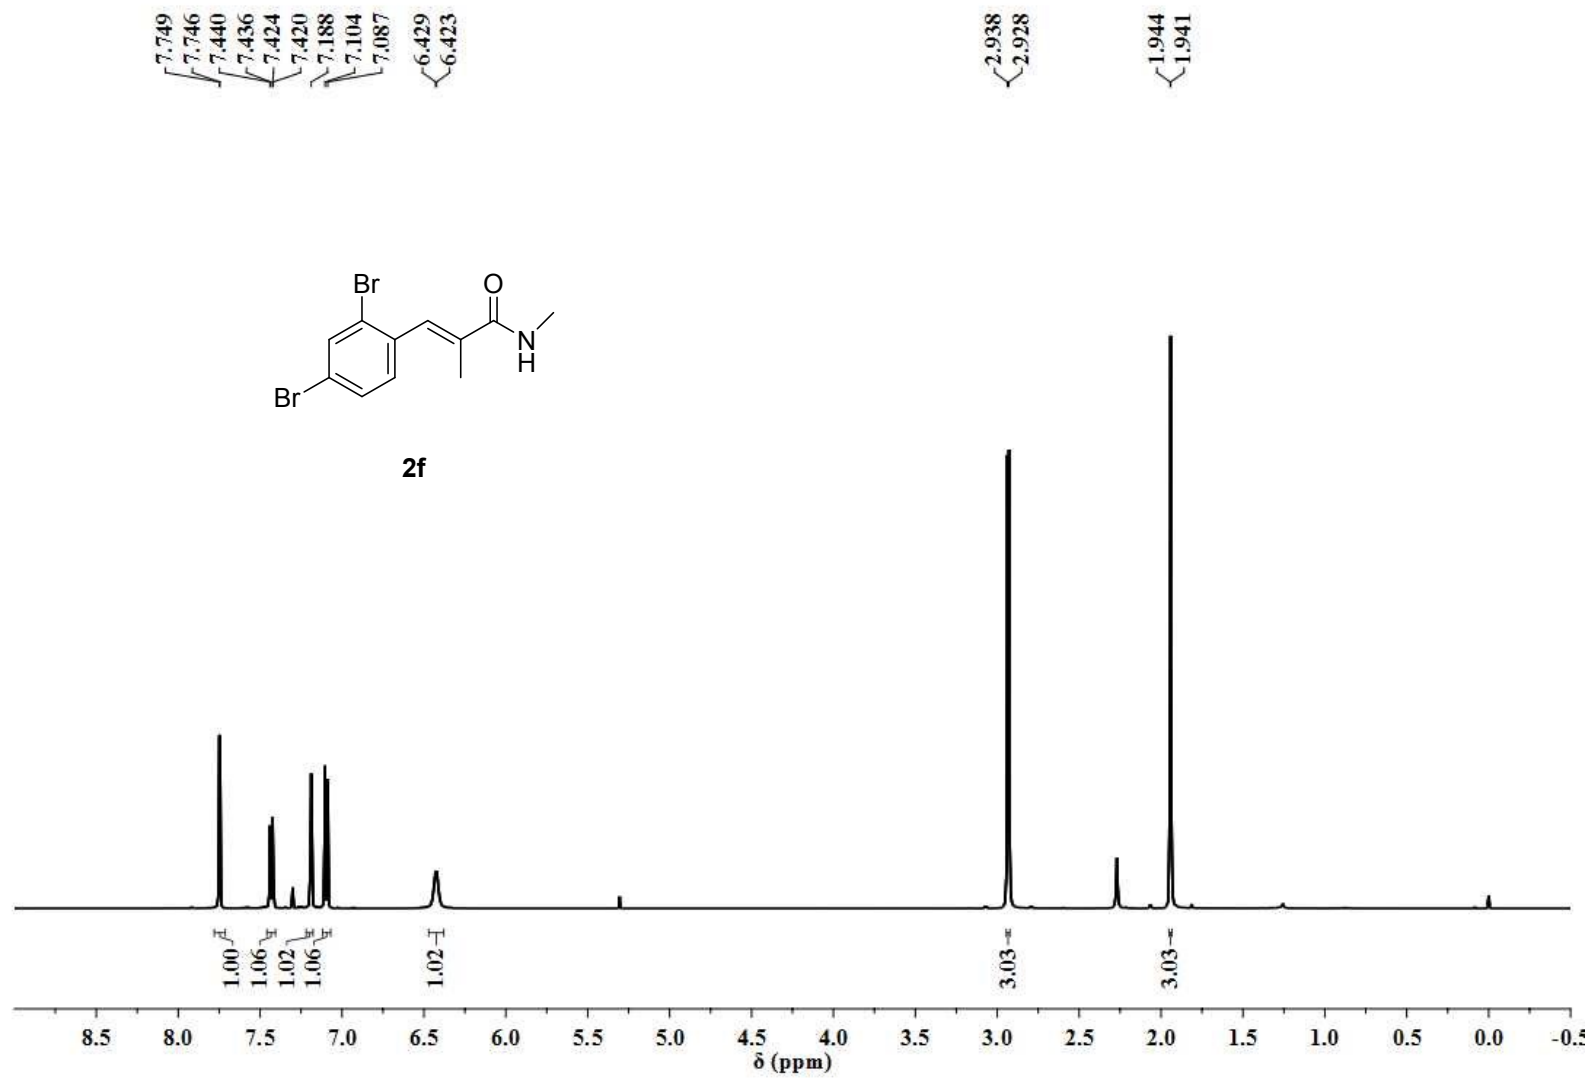

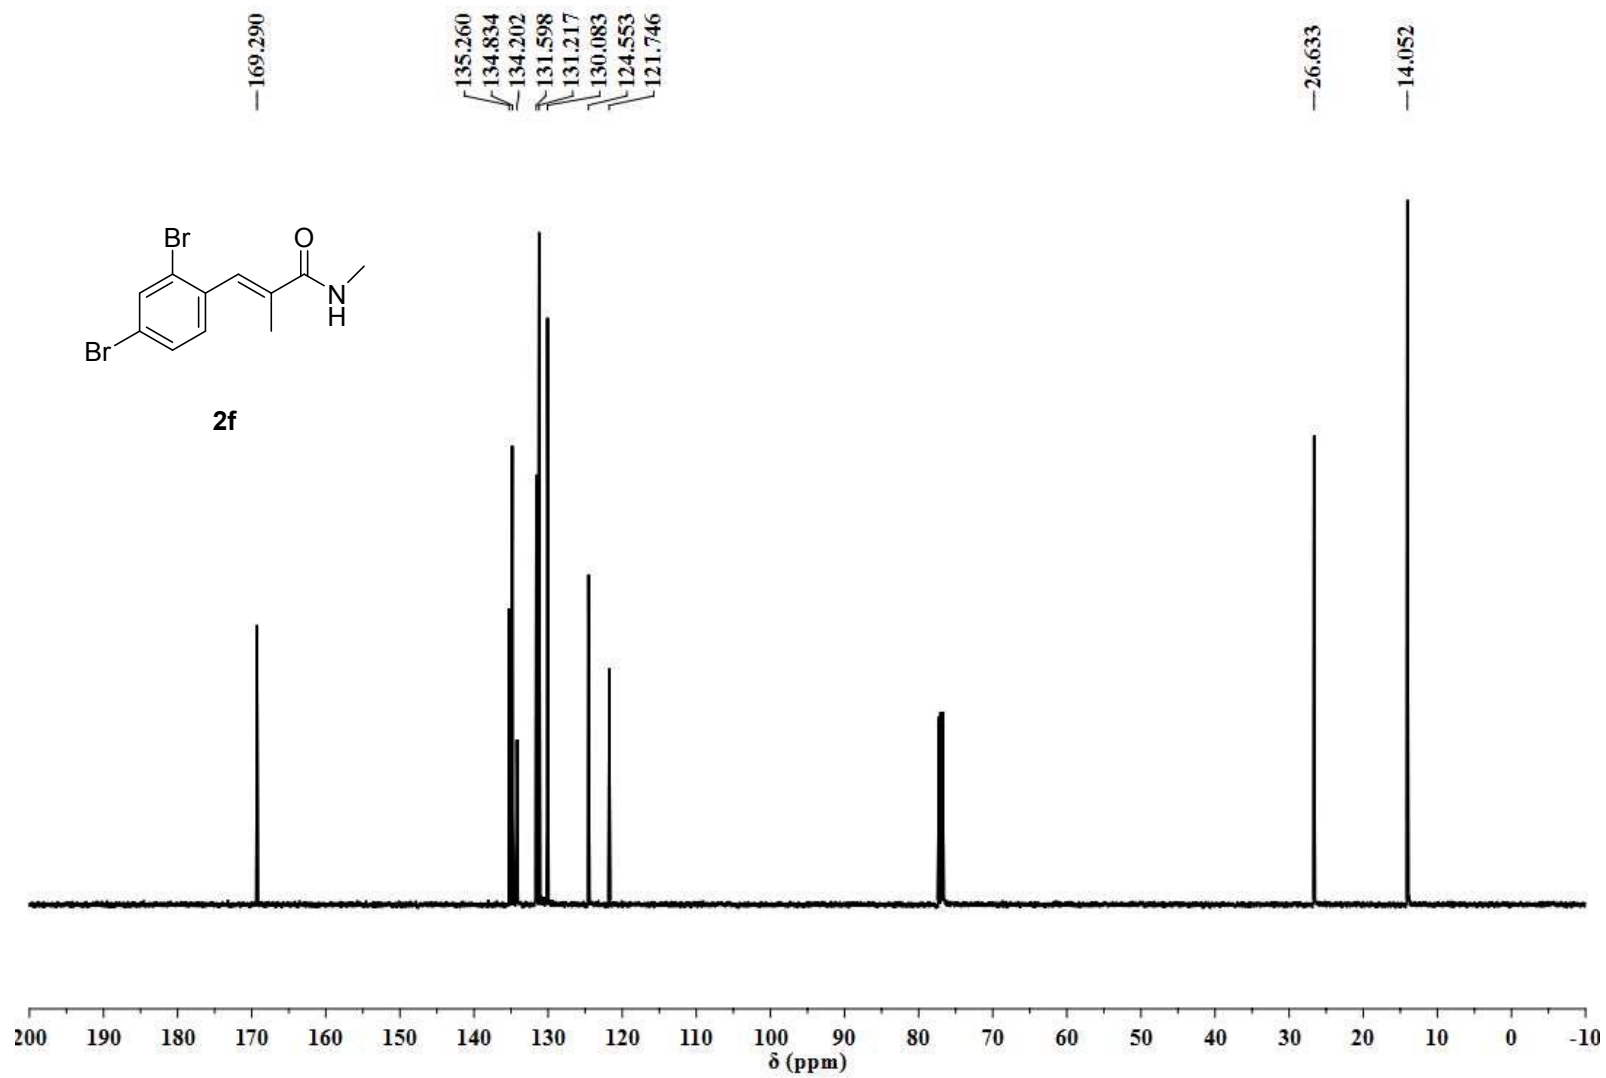

7.857  
7.576  
7.560  
7.363  
7.347  
7.294  
7.281

6.358

2.966  
2.956

1.971  
1.969

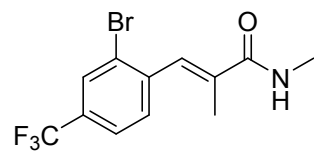

2g

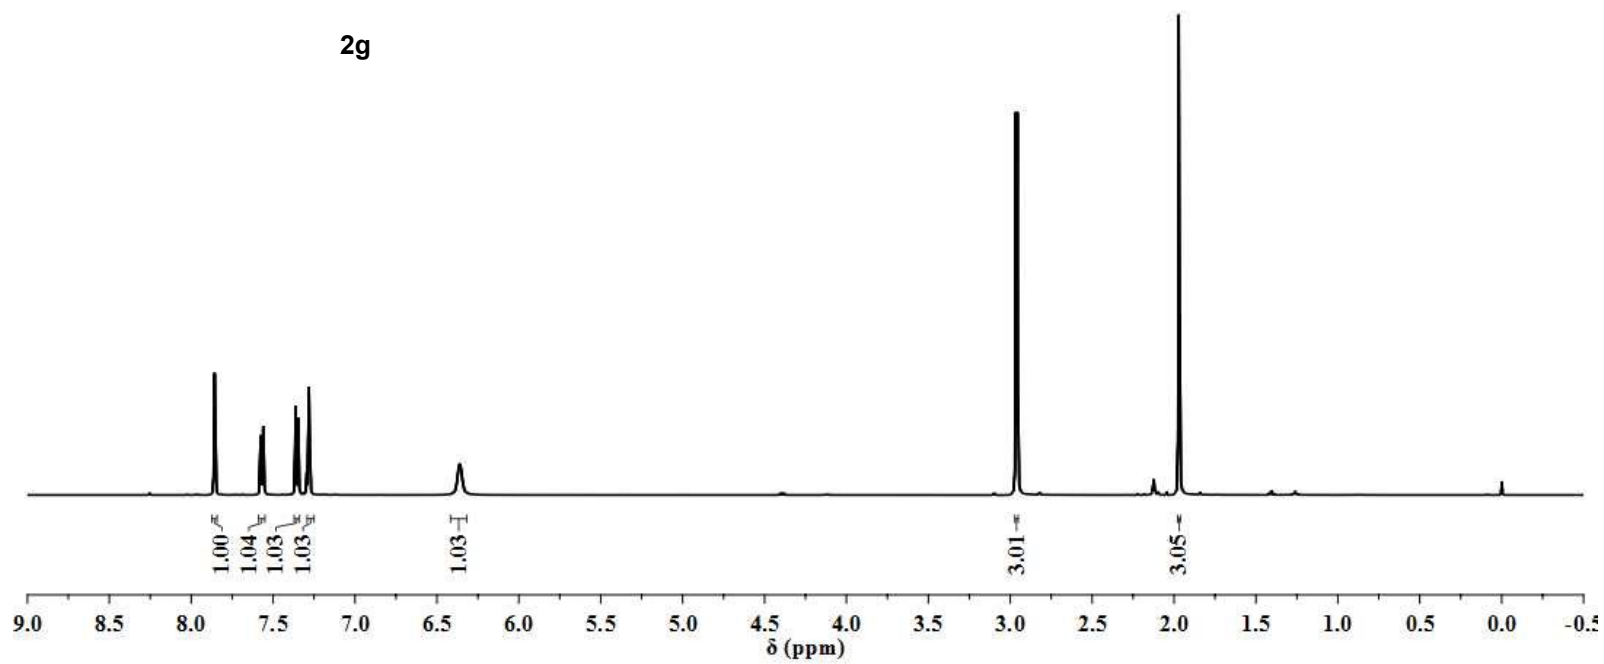

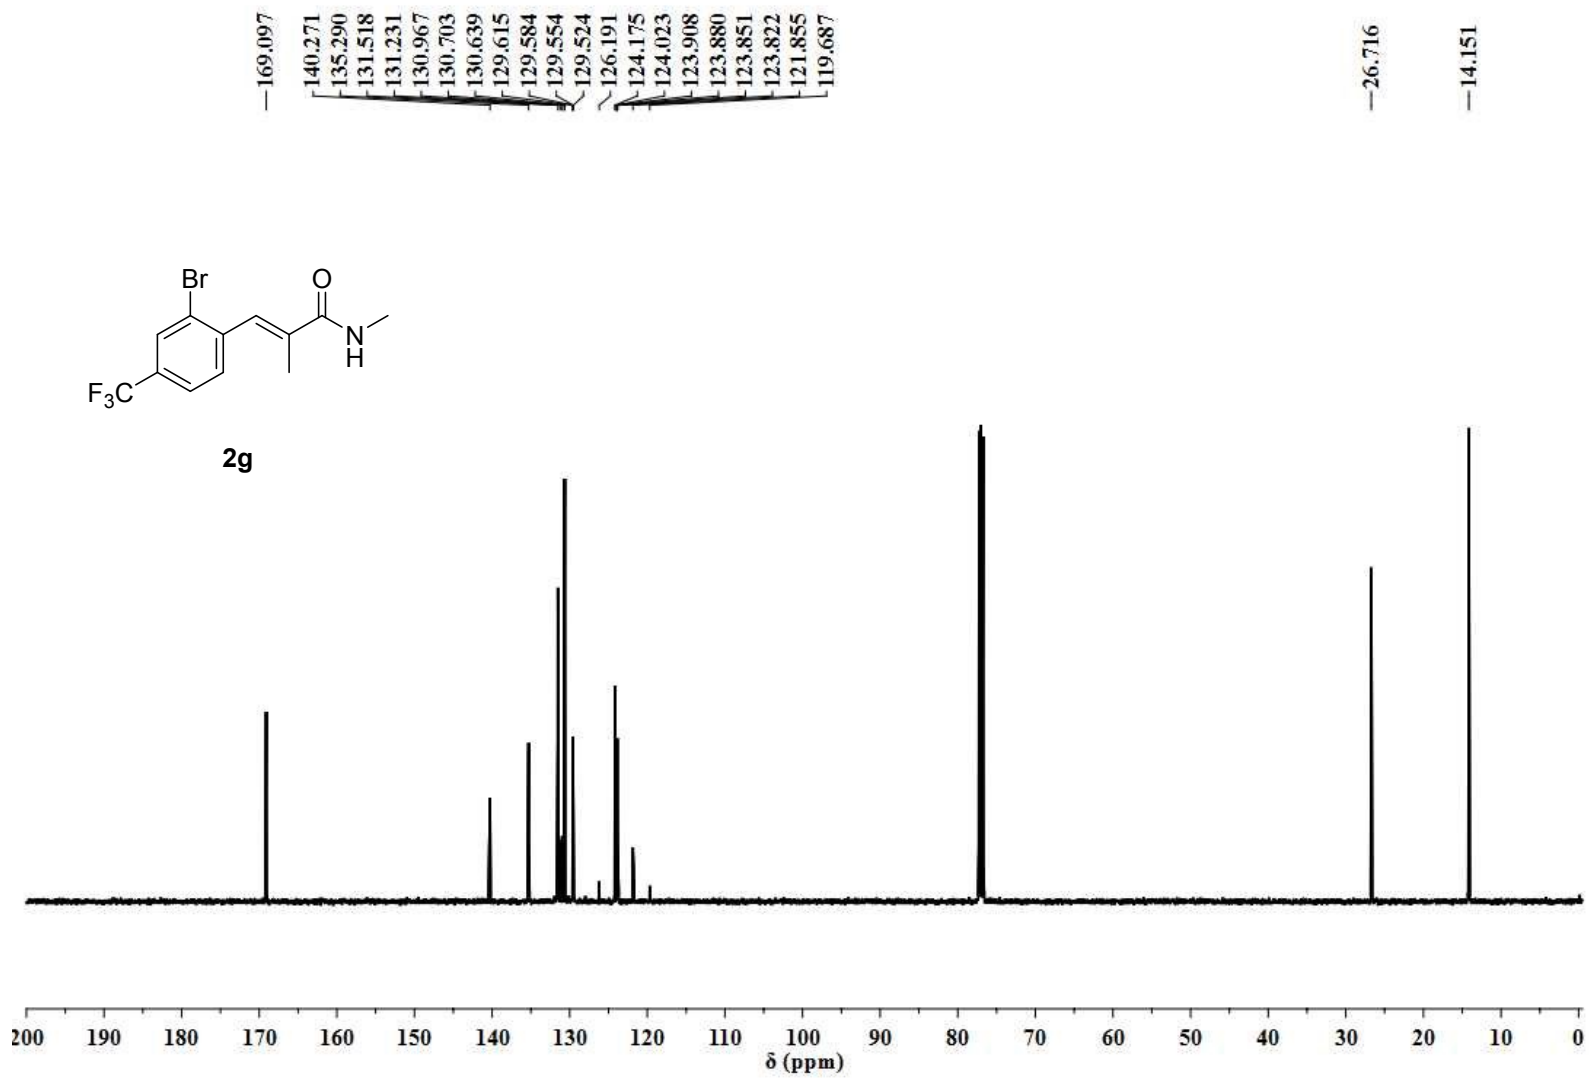

ZBW-WZ-880-F

-62.73

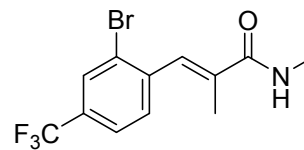

**2g**

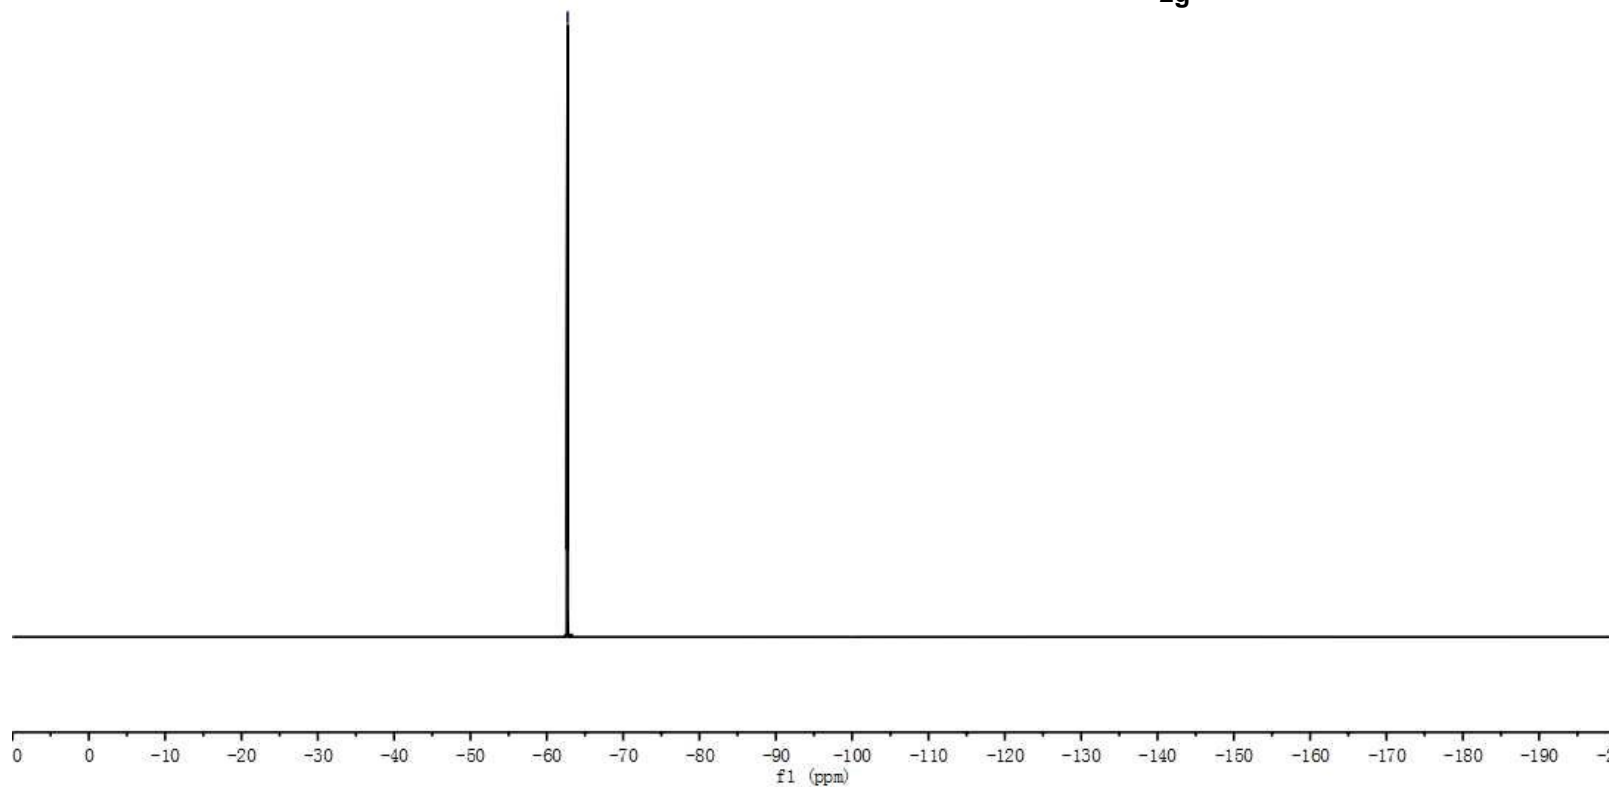

7.901  
7.898  
7.628  
7.625  
7.612  
7.609  
7.371  
7.355  
7.267

6.161

2.966  
2.956

1.972  
1.970

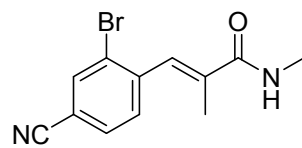

2h

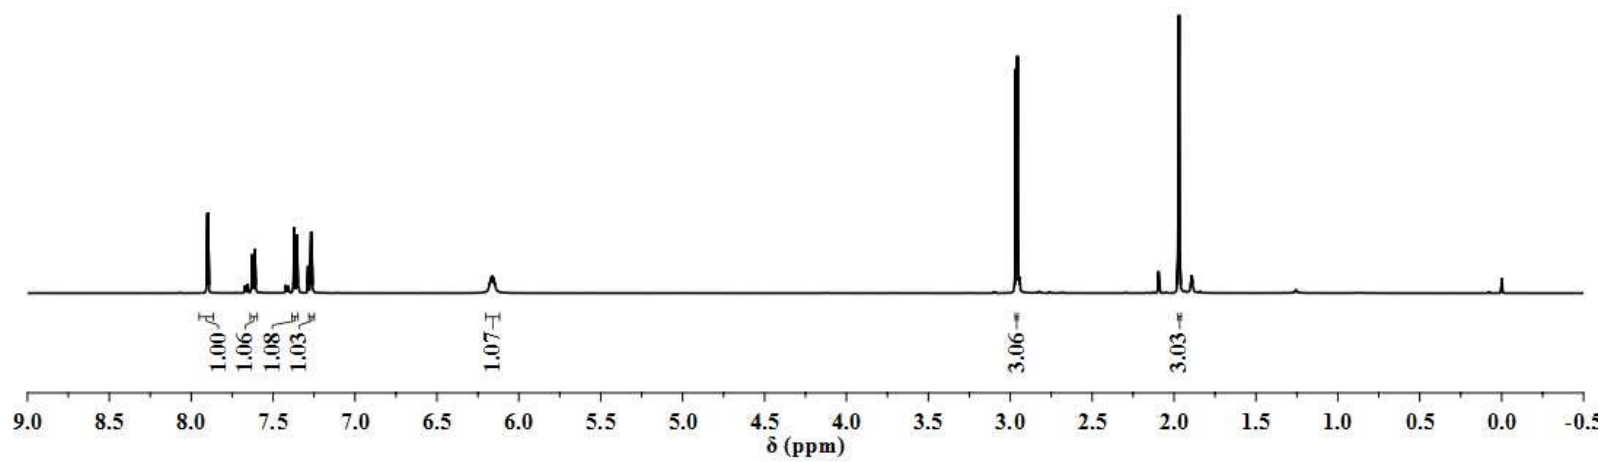



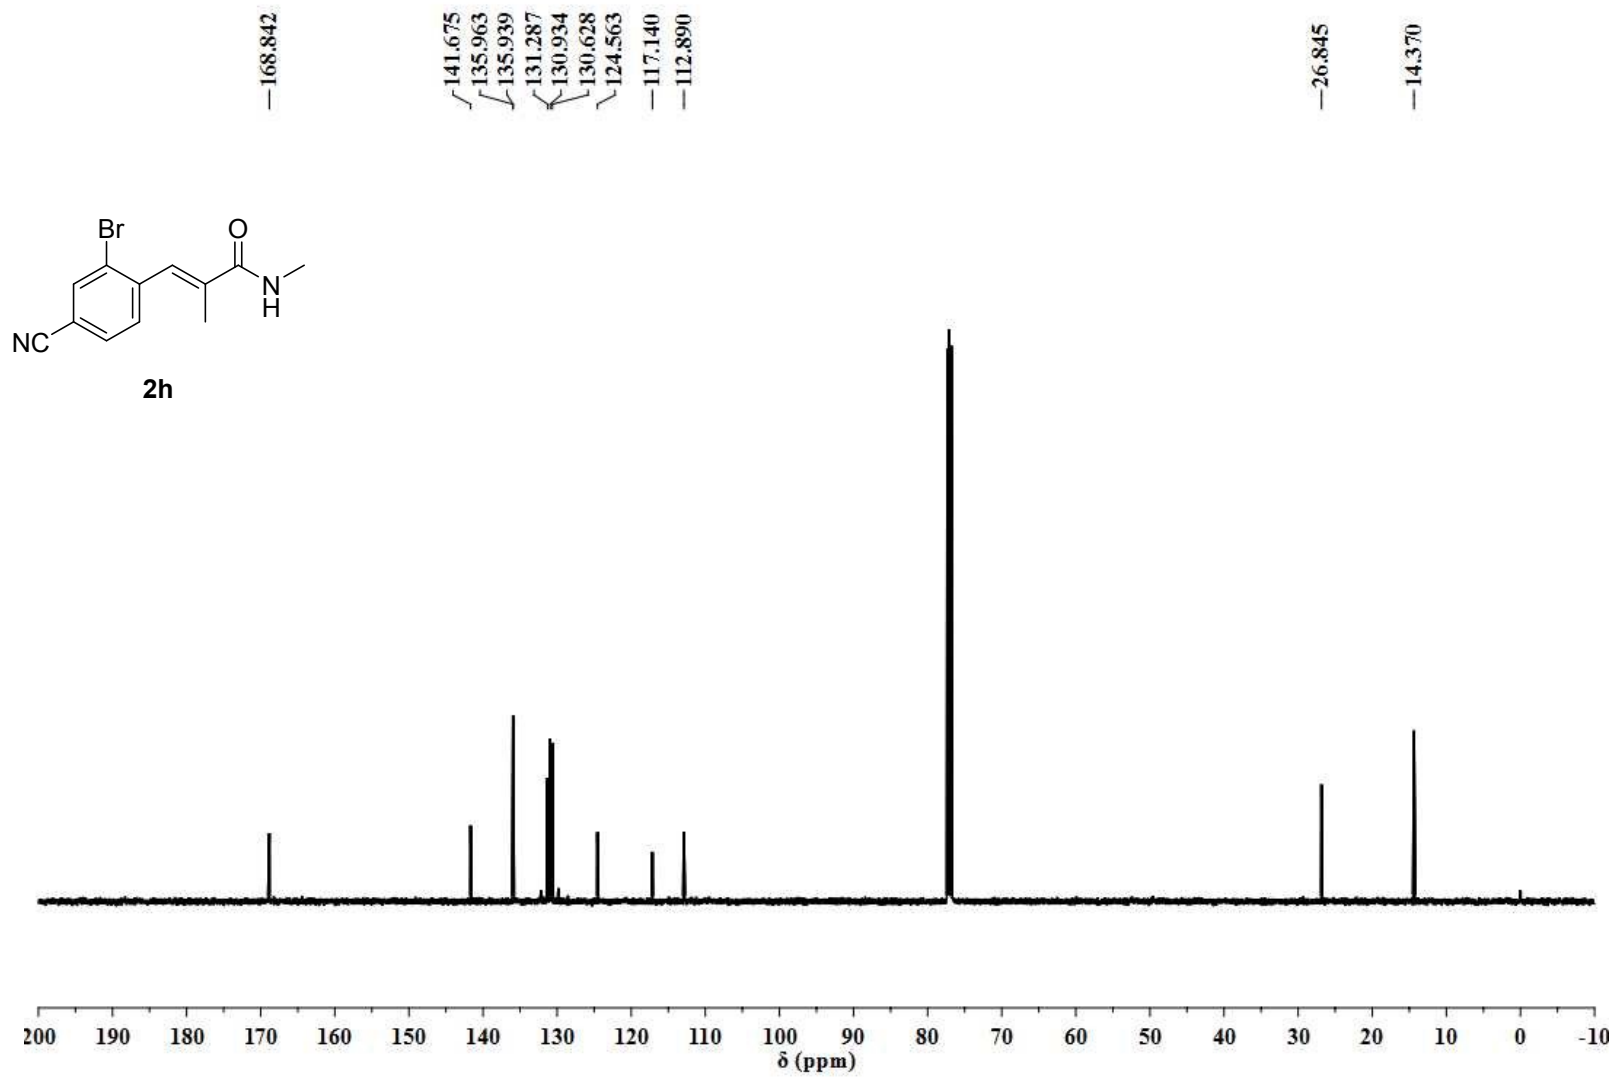

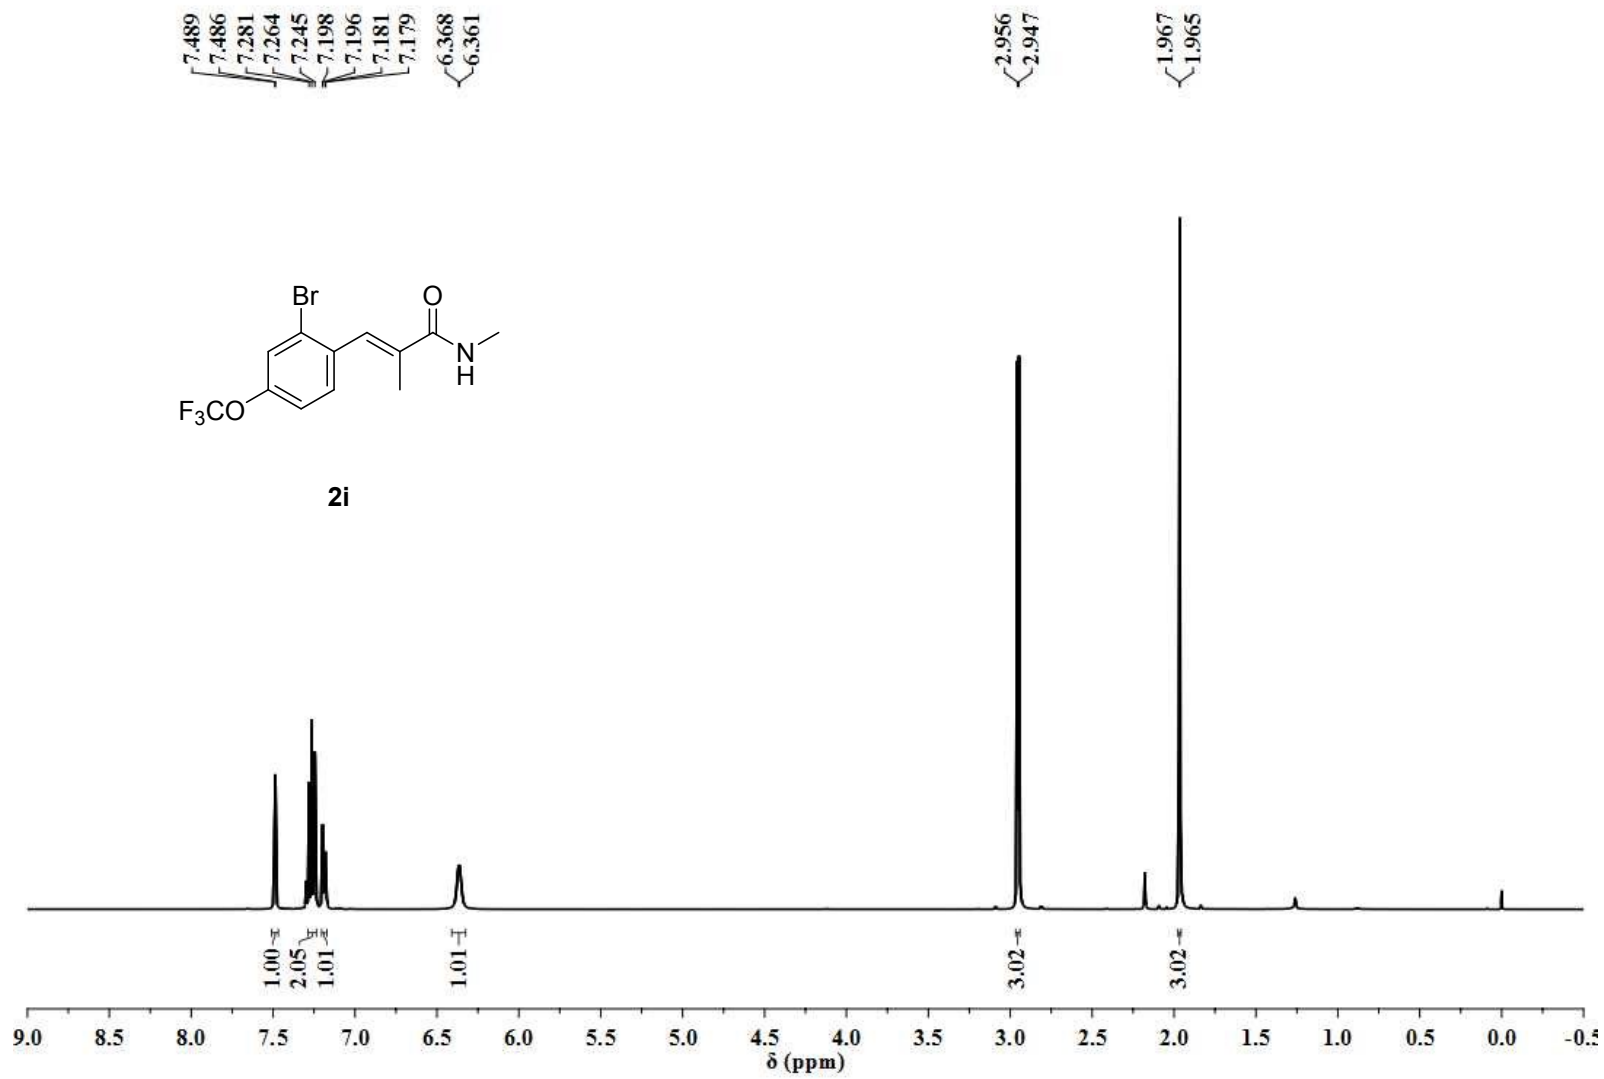

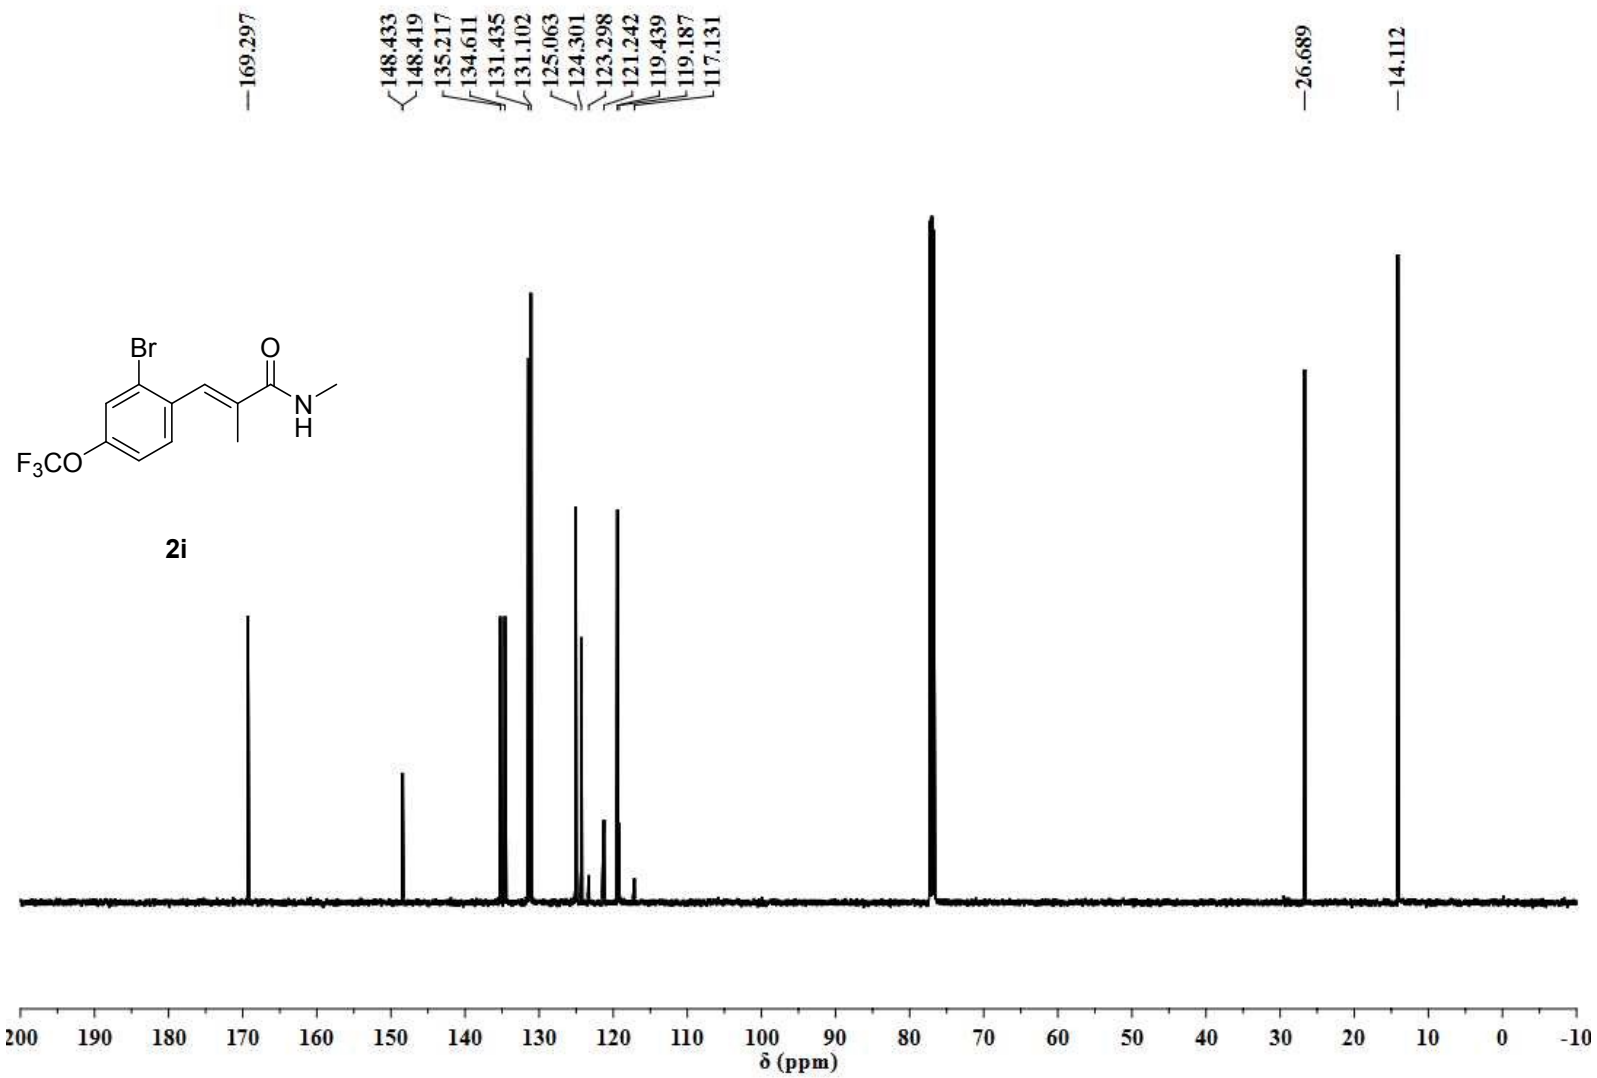

ZBW-WZ-954-F

—57.98

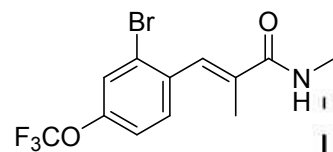

**2i**

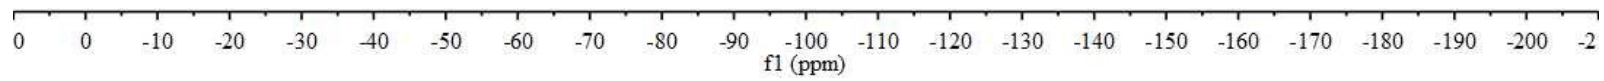

S44

7.417  
7.240  
7.134  
7.118  
7.101  
7.085  
—6.292

2.933  
2.924  
—2.325  
1.959  
1.956

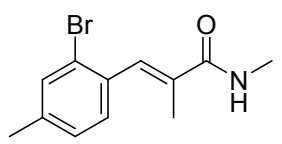

**2j**

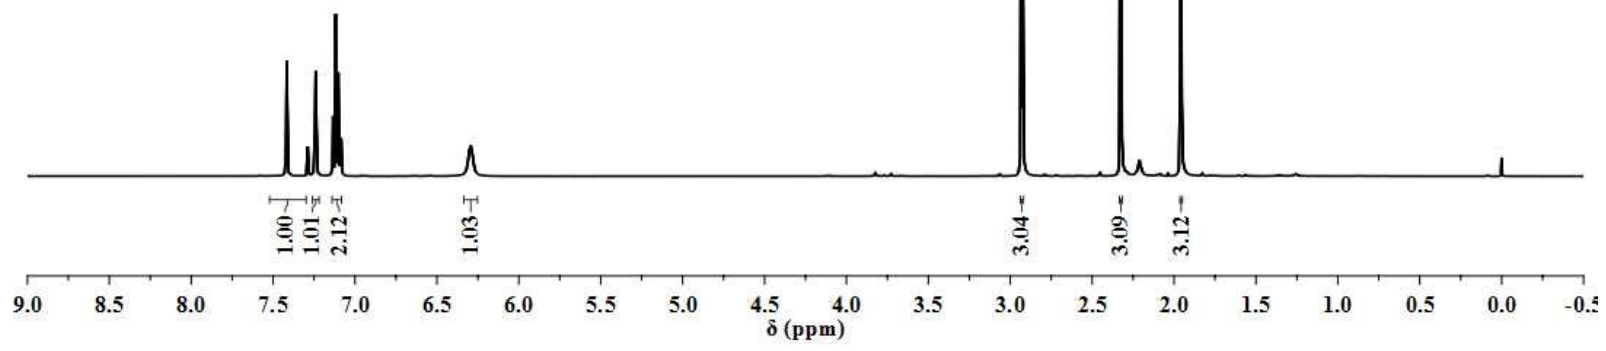

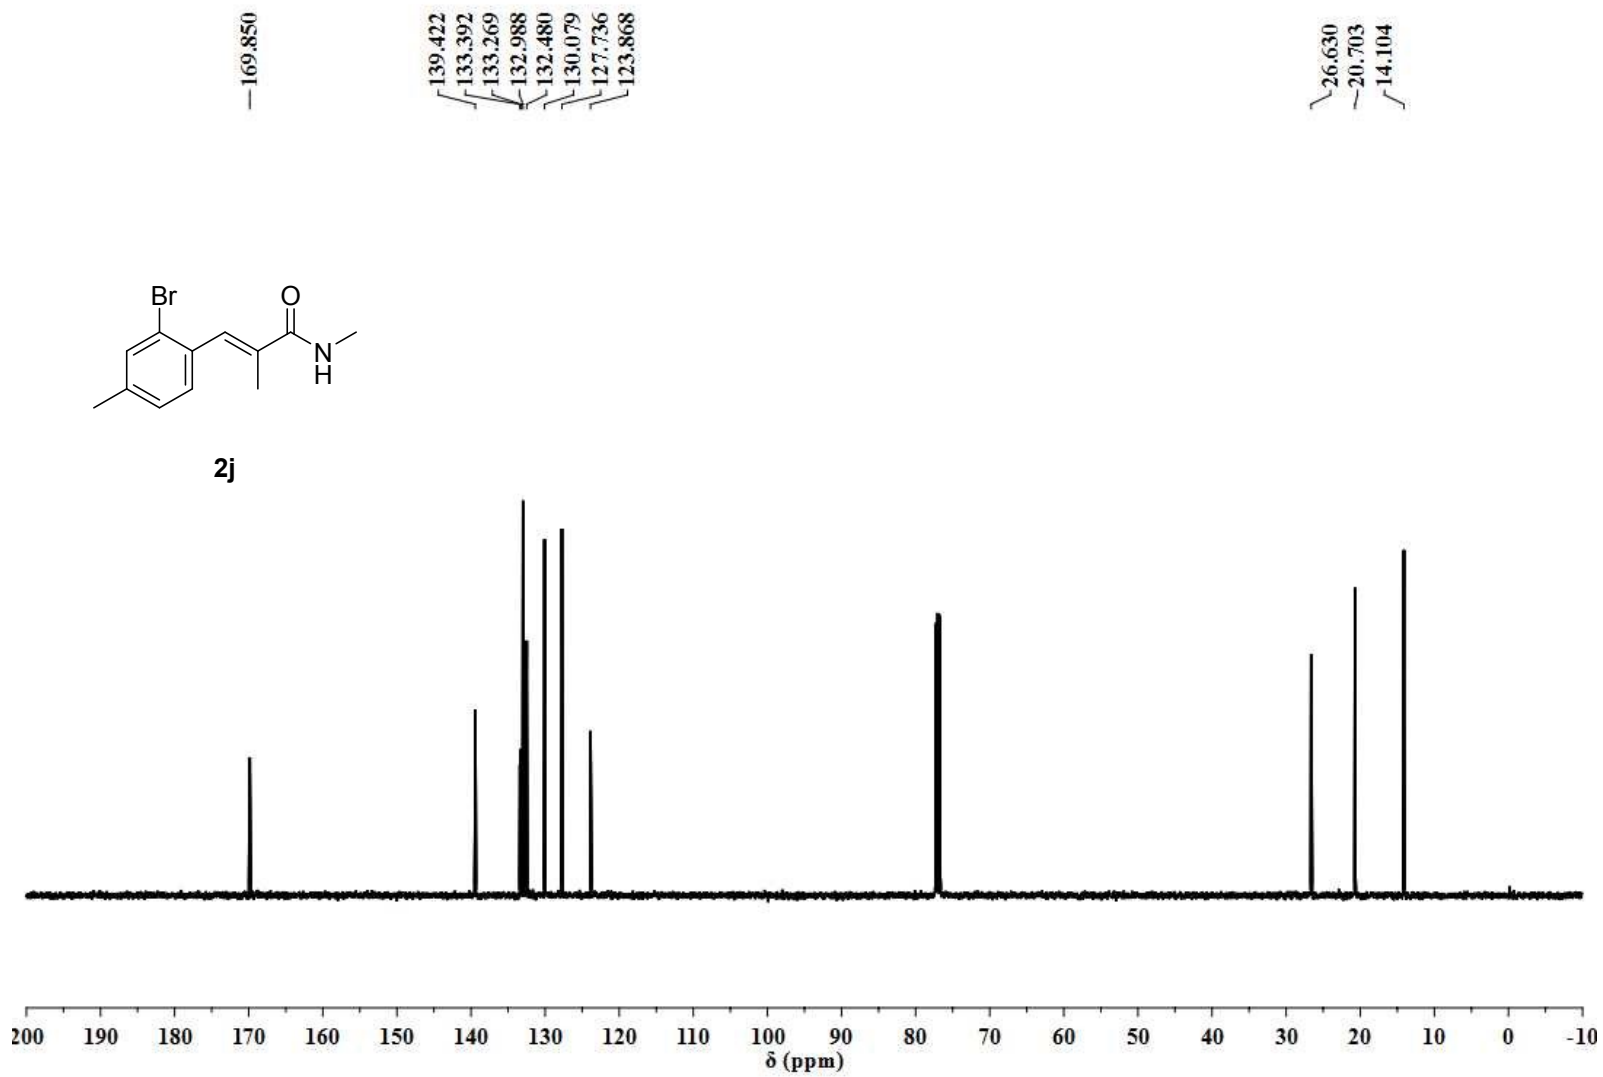

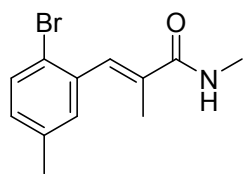

2k

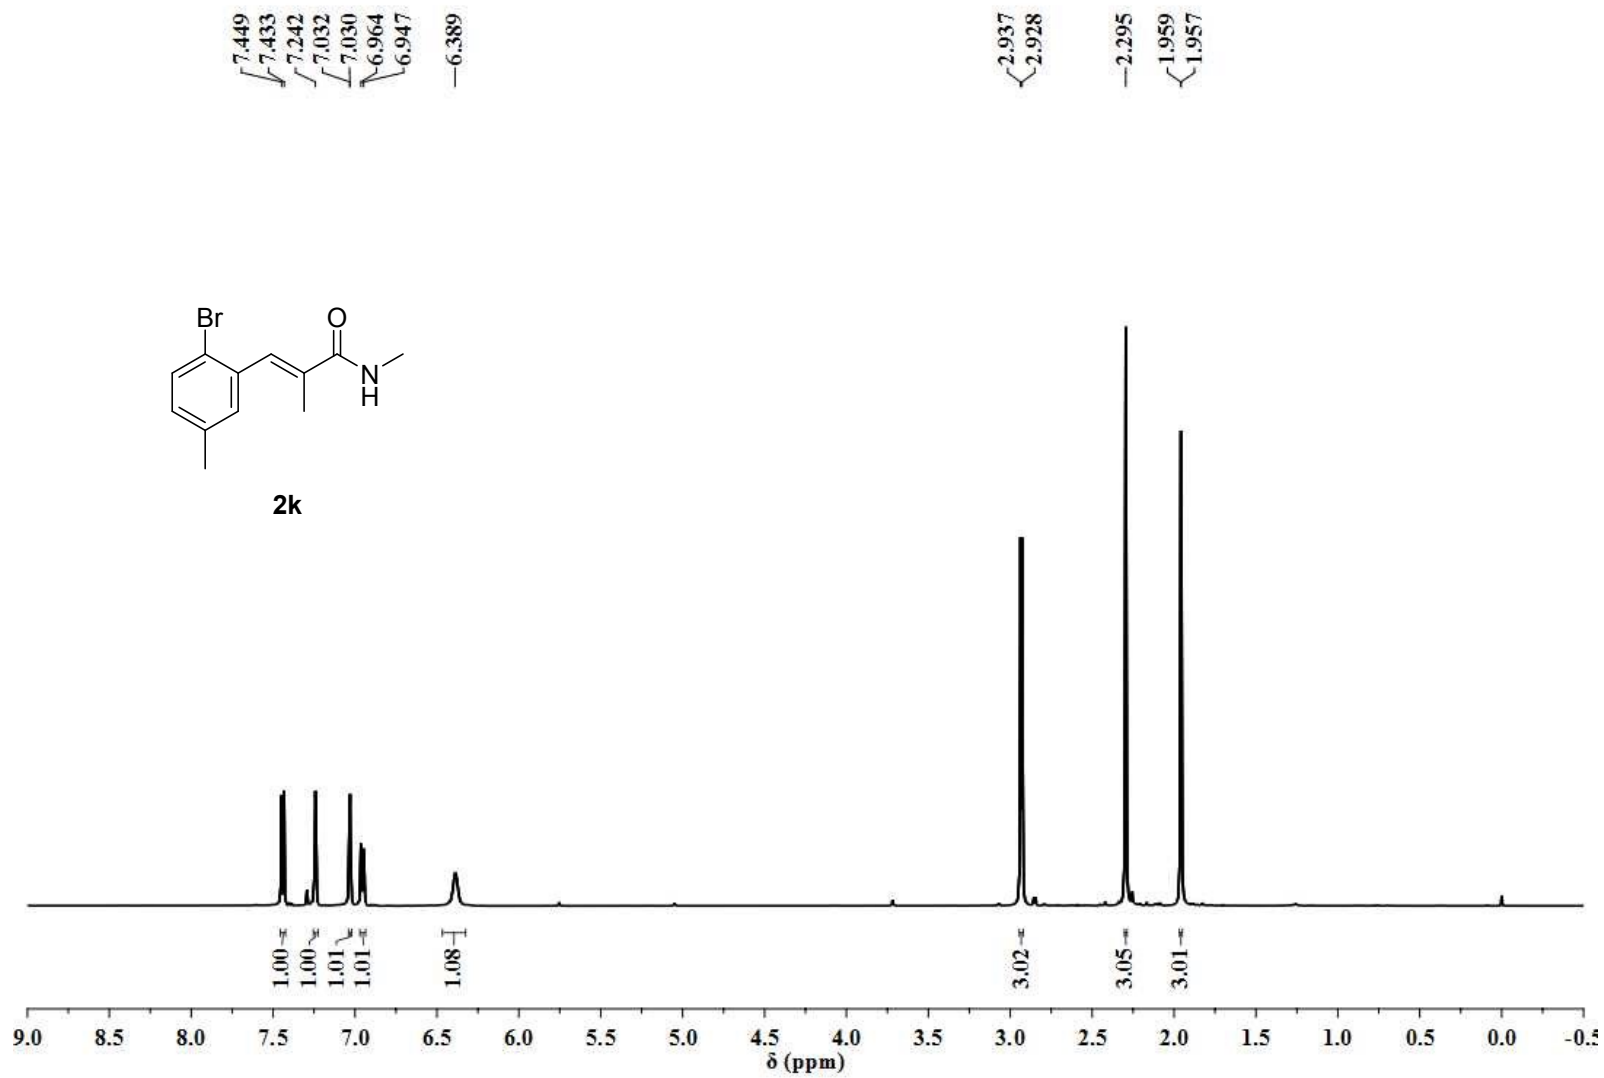

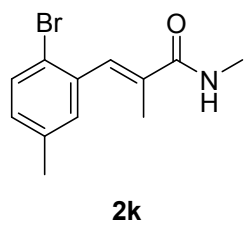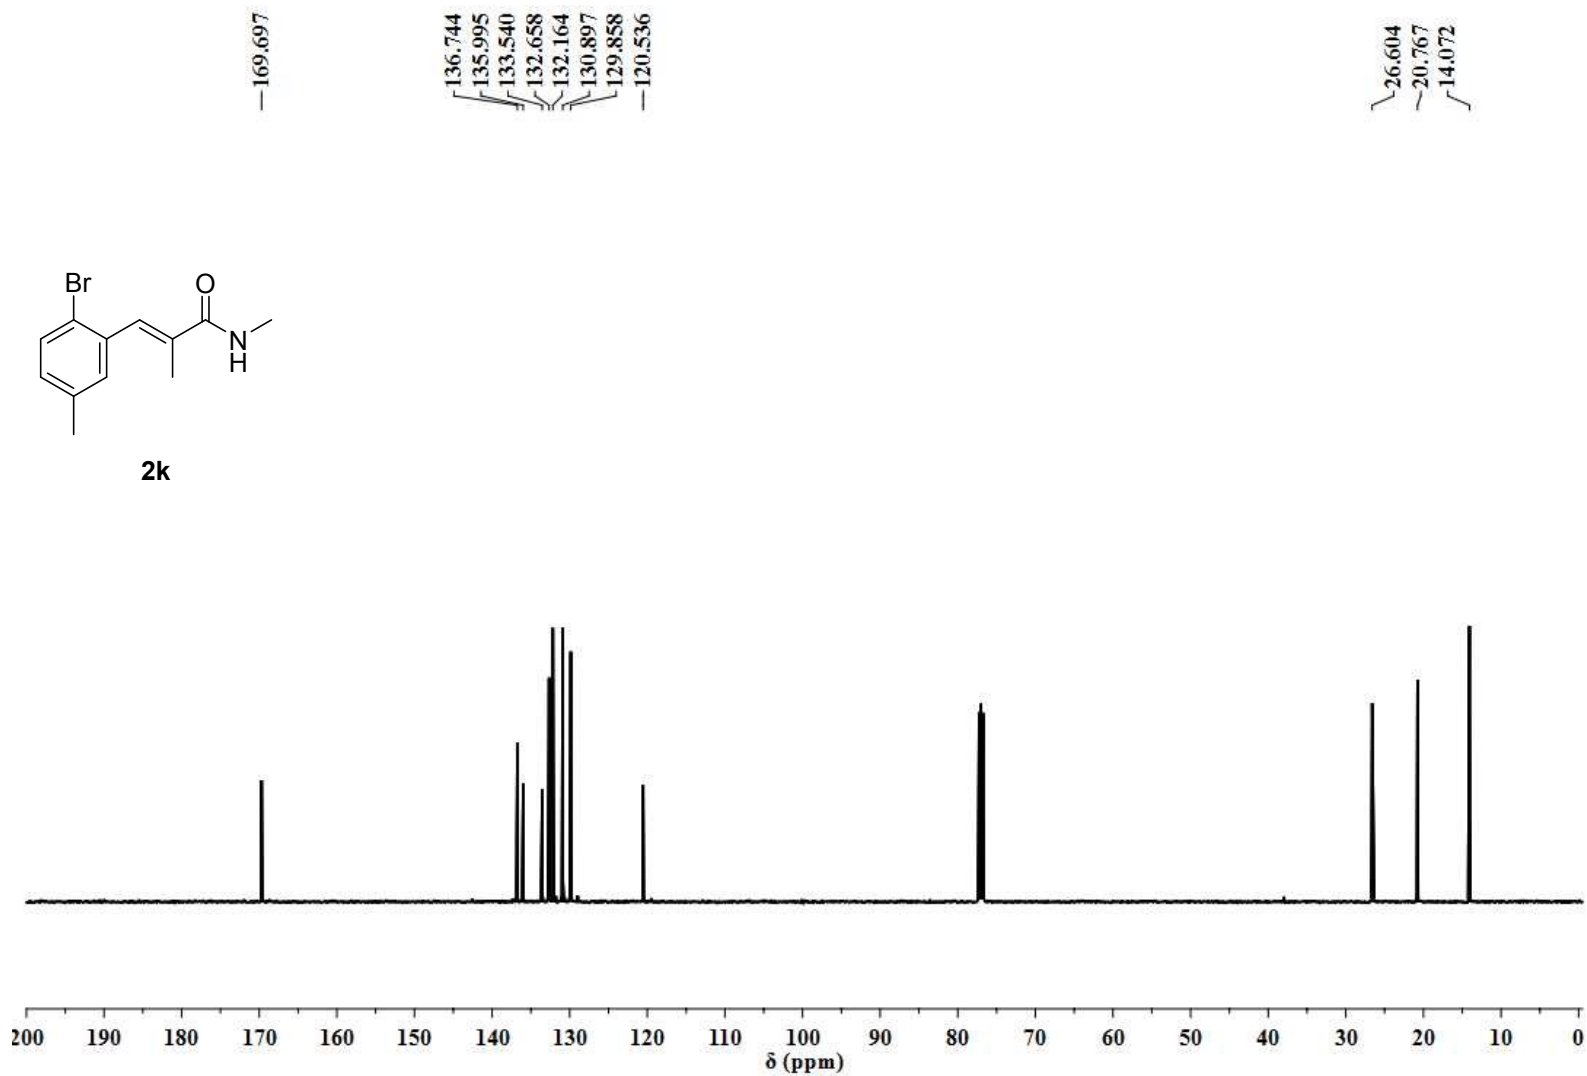



7.422  
7.418  
7.258  
7.253  
7.240  
7.236

6.230

2.947  
2.937

1.972  
1.969

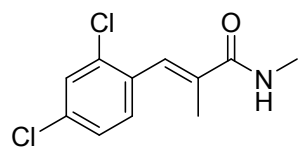

2I

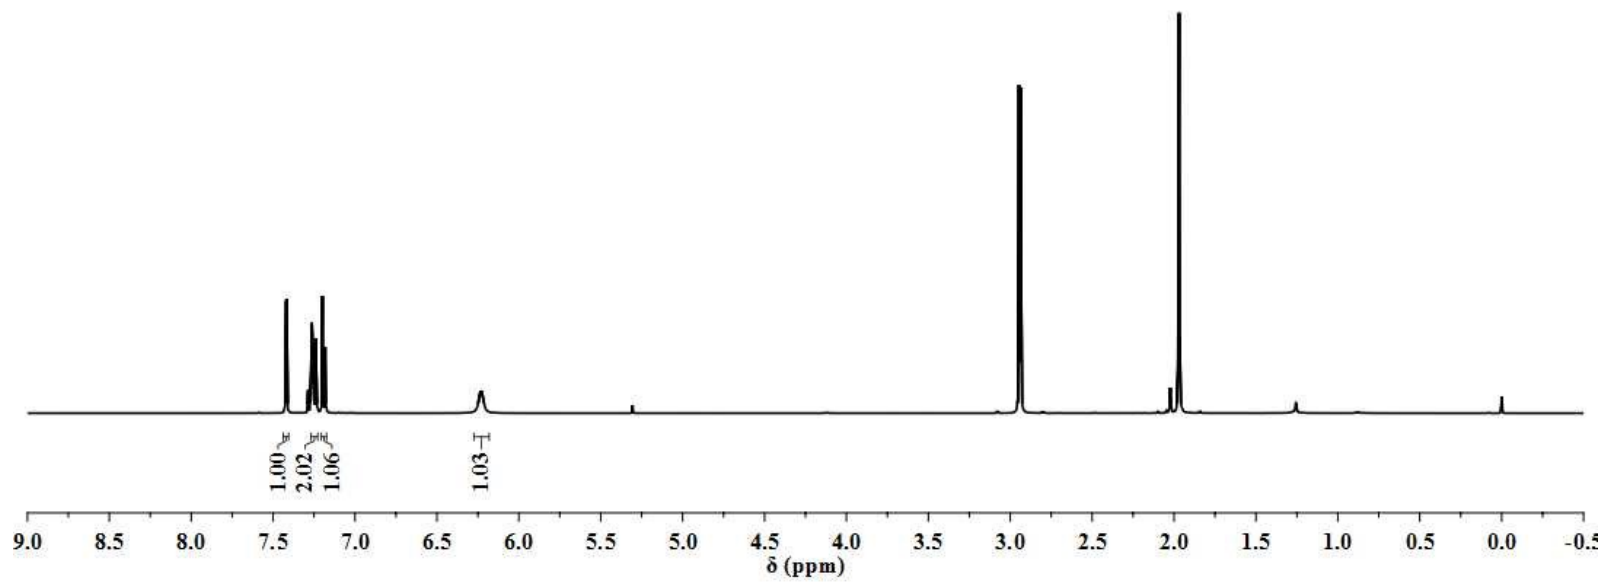

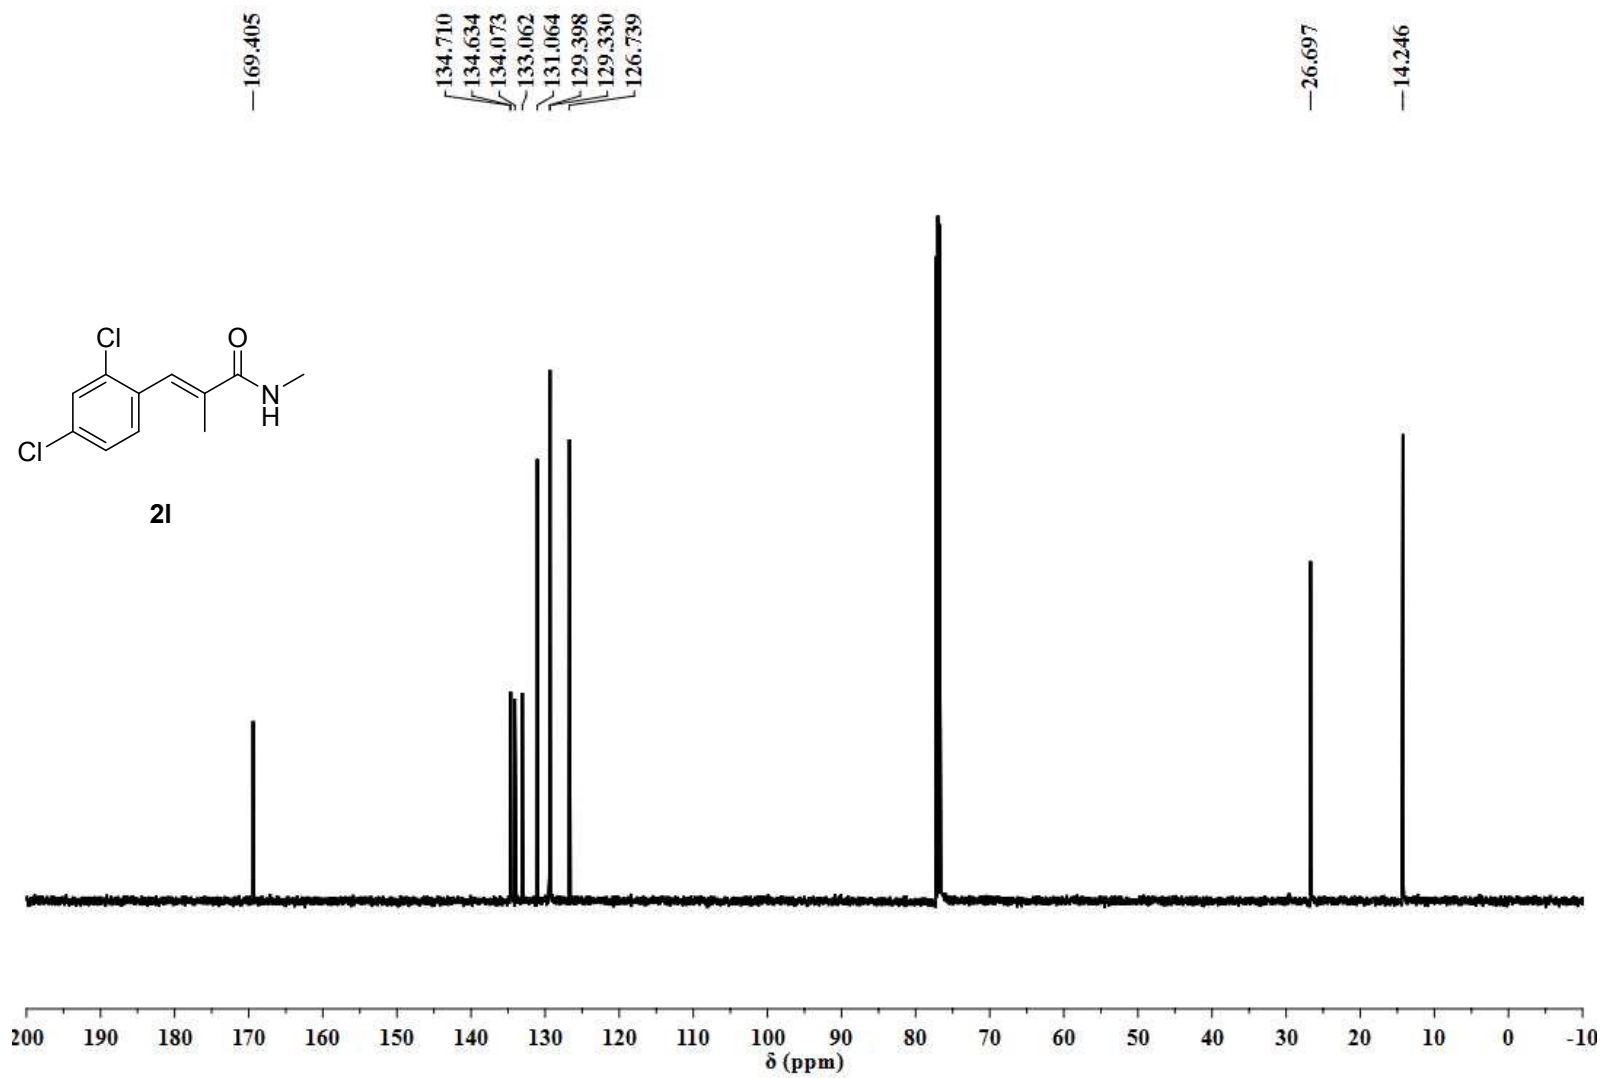

7.571  
7.567  
7.401  
7.397  
7.384  
7.380  
7.238  
7.130  
7.113

6.257

2.942  
2.932

1.964  
1.962

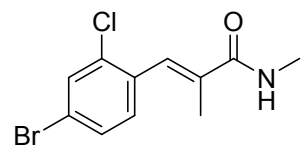

2m

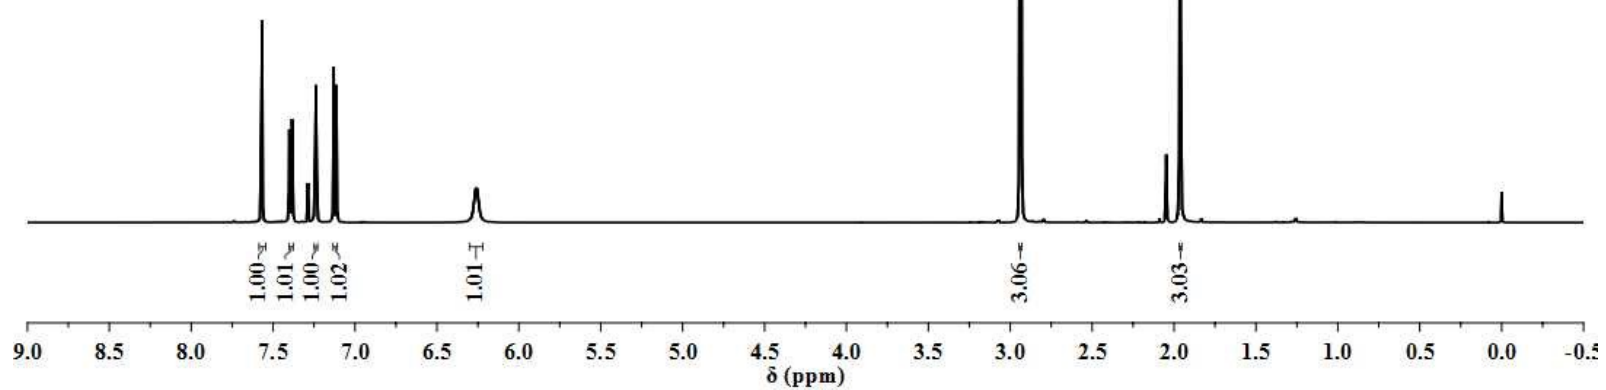

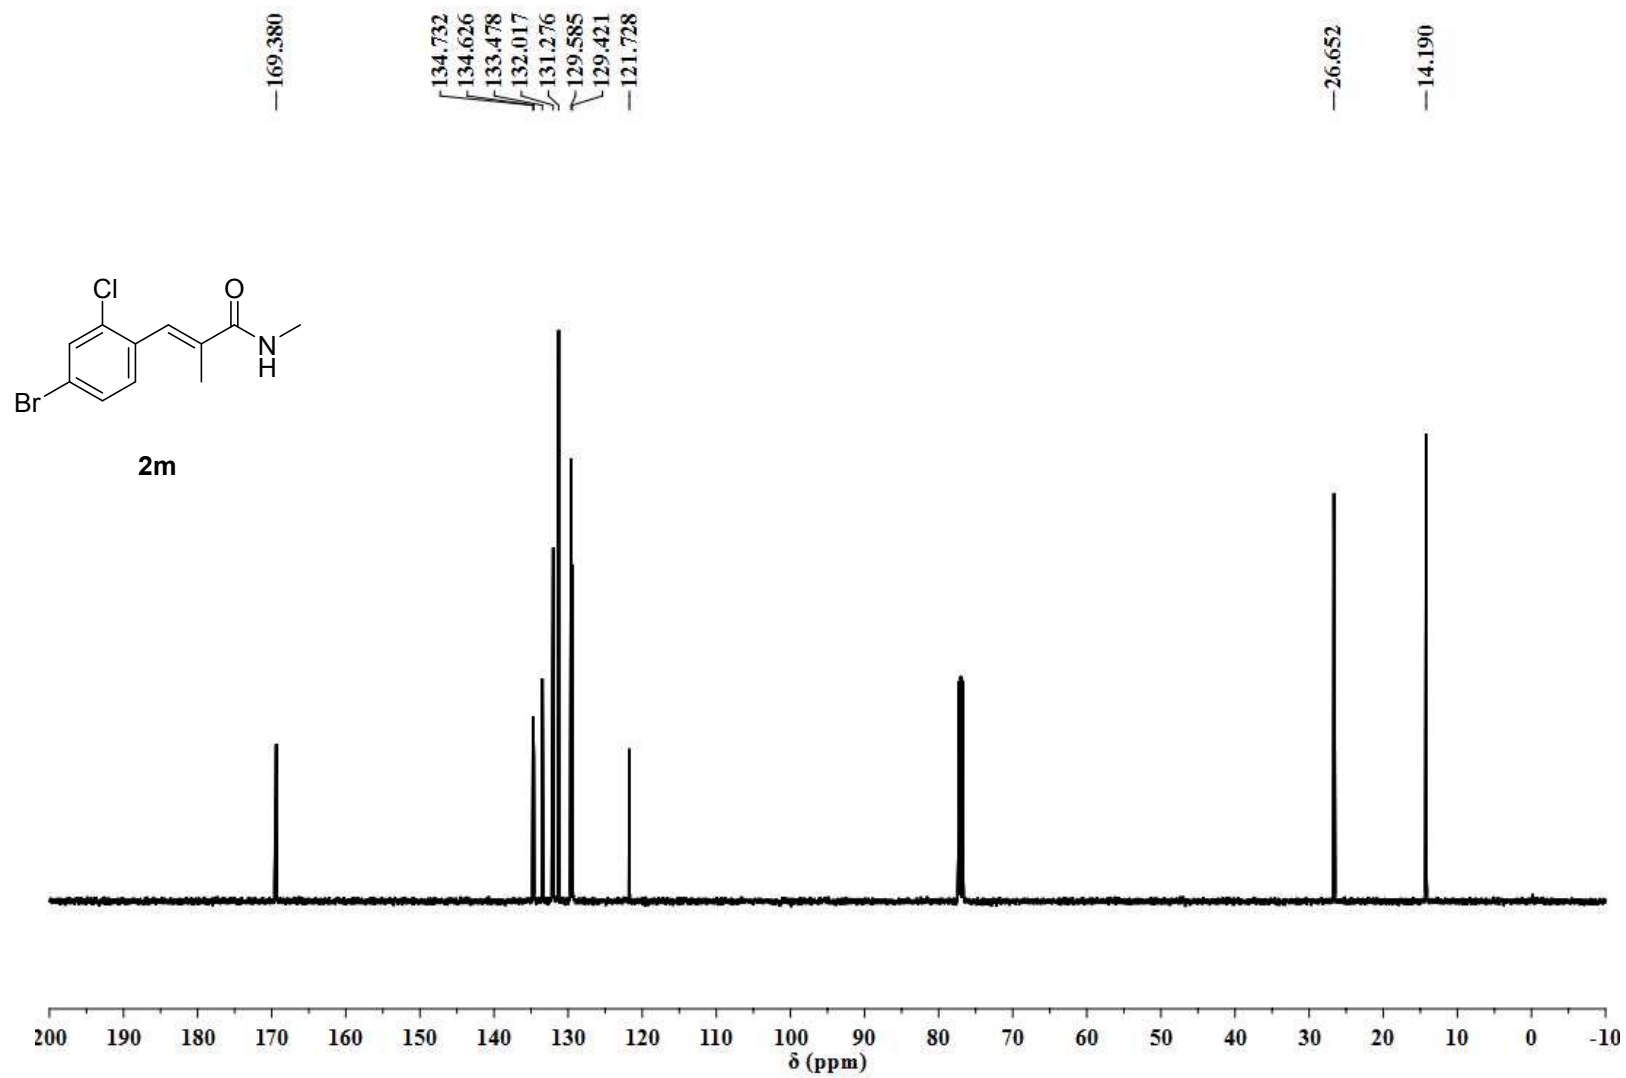

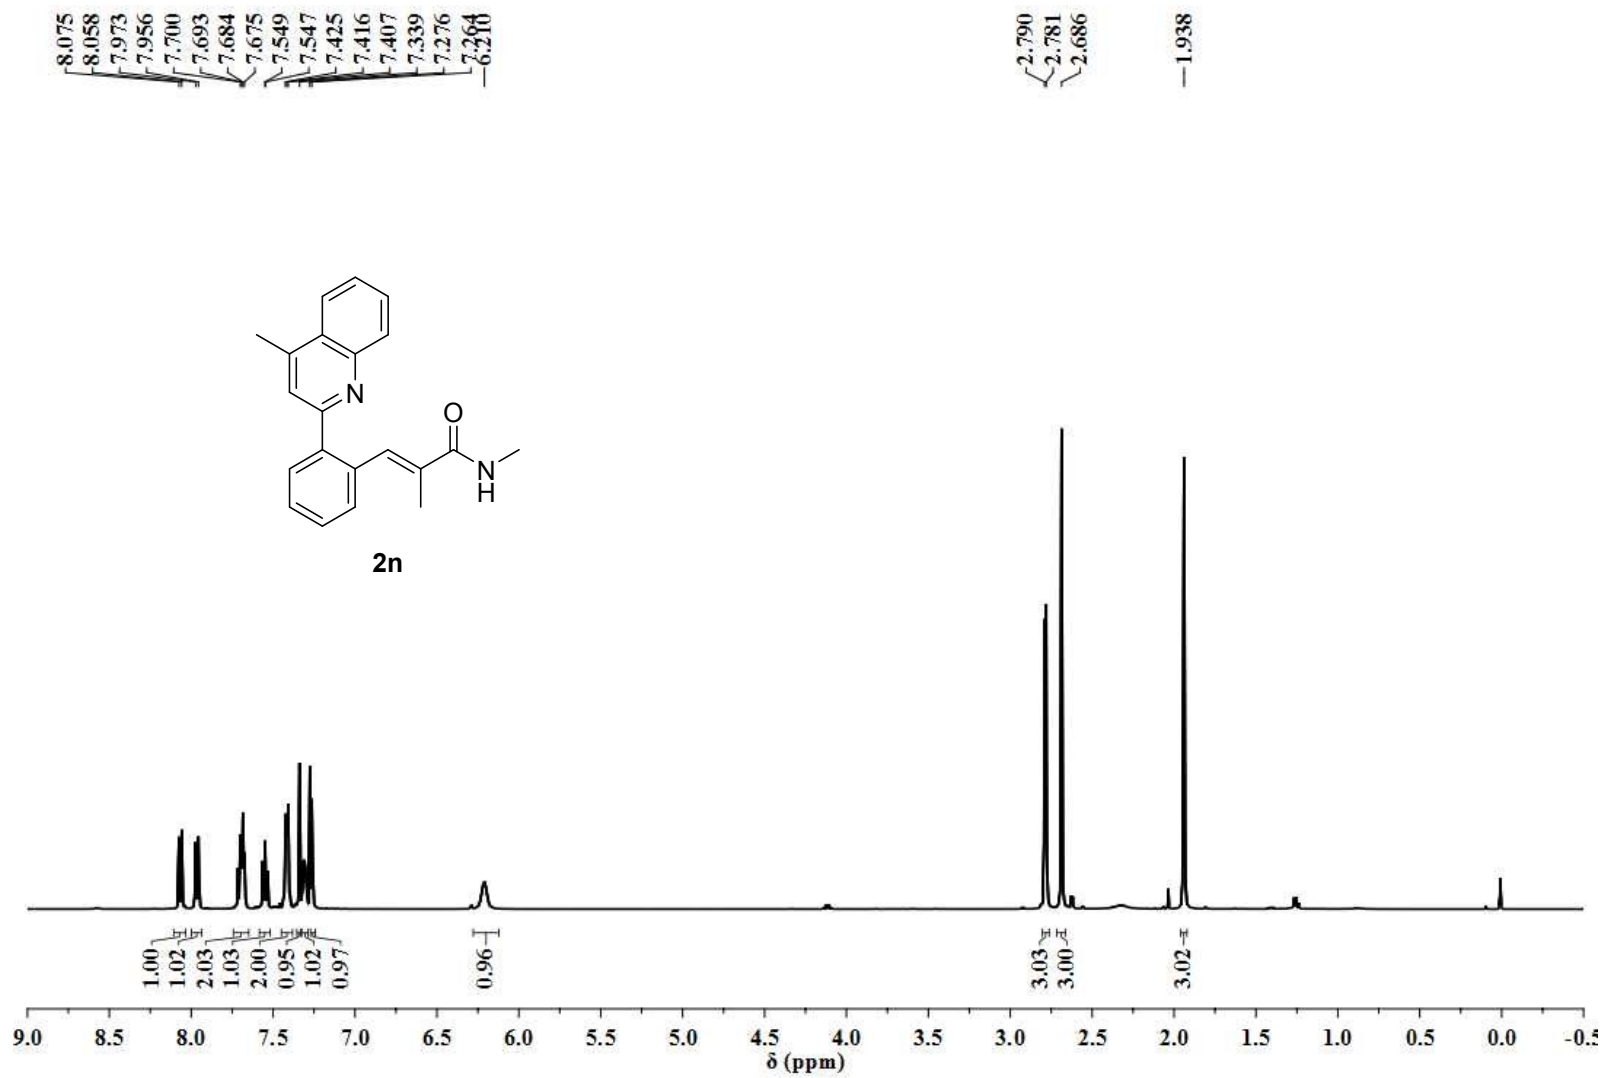

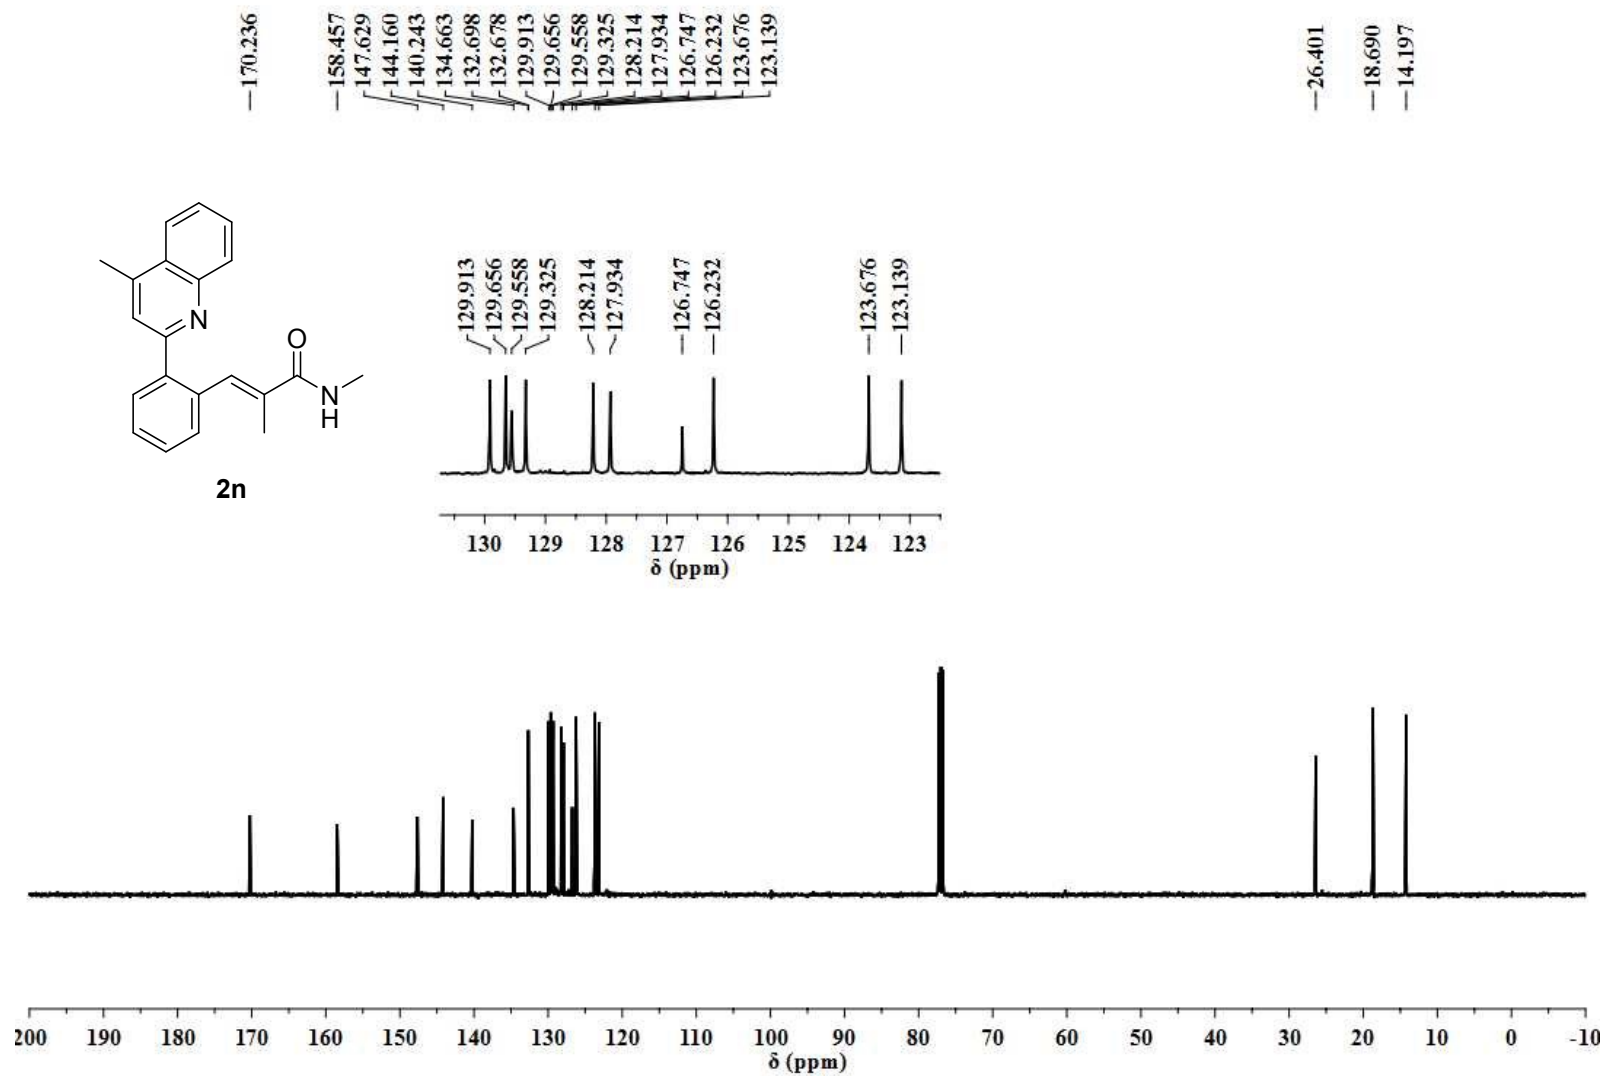

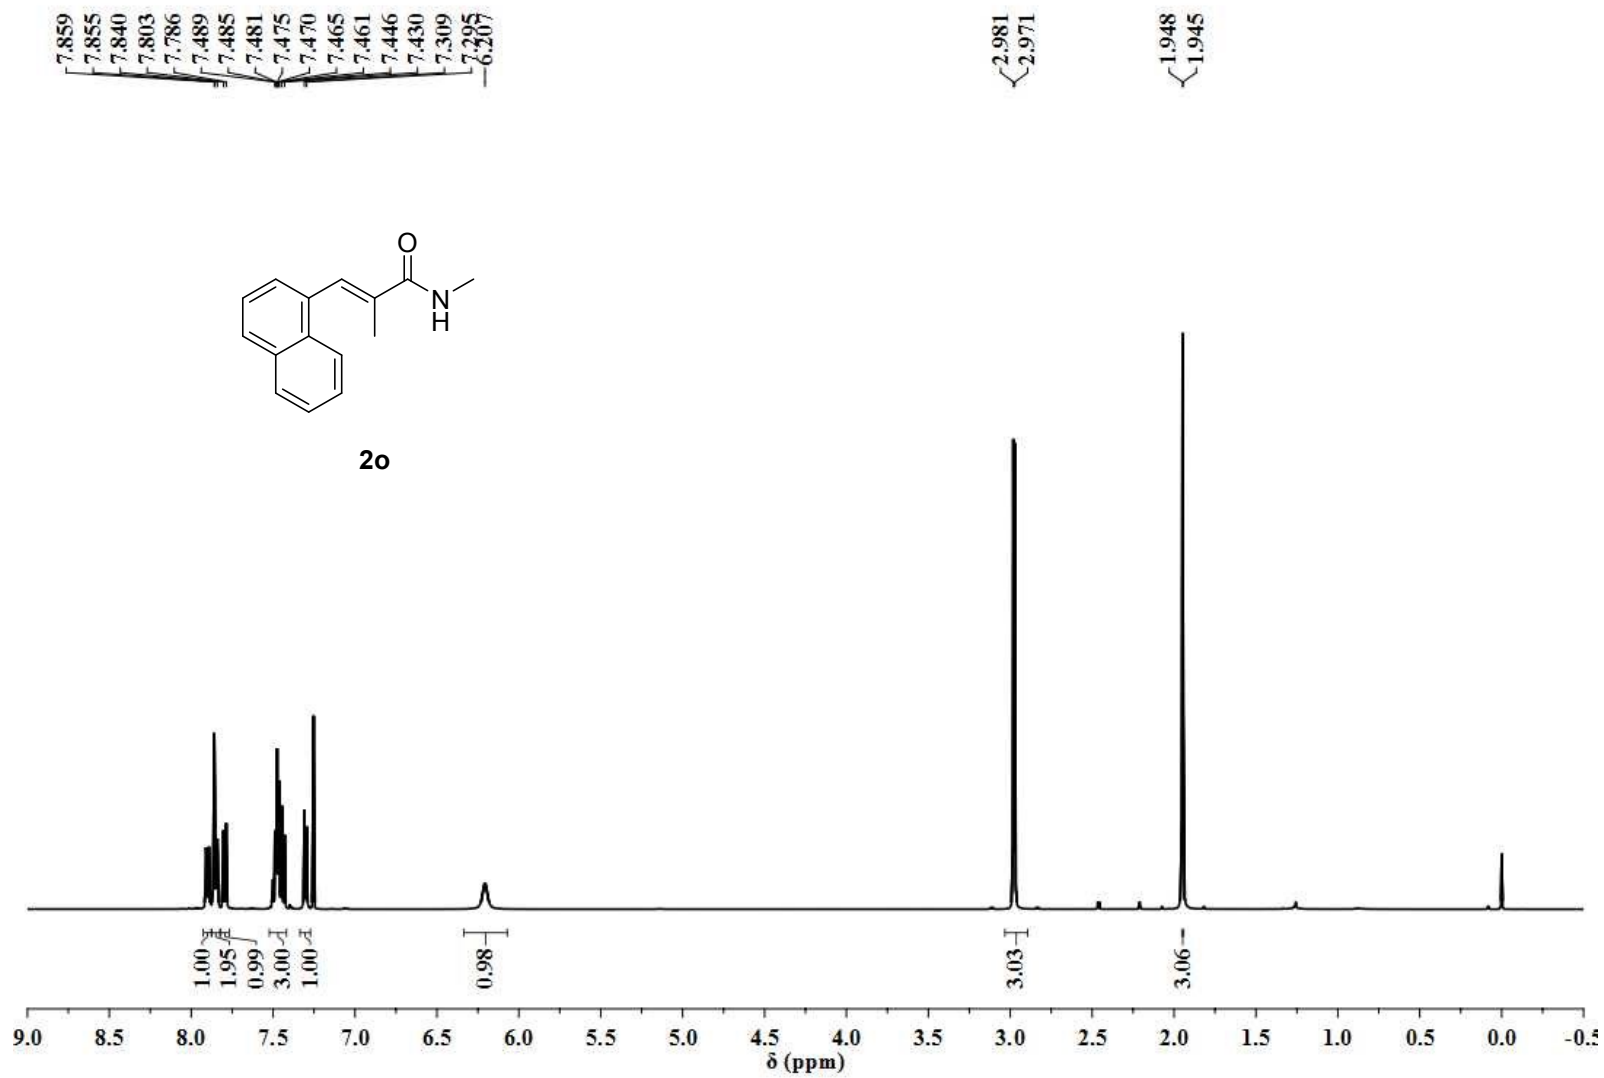

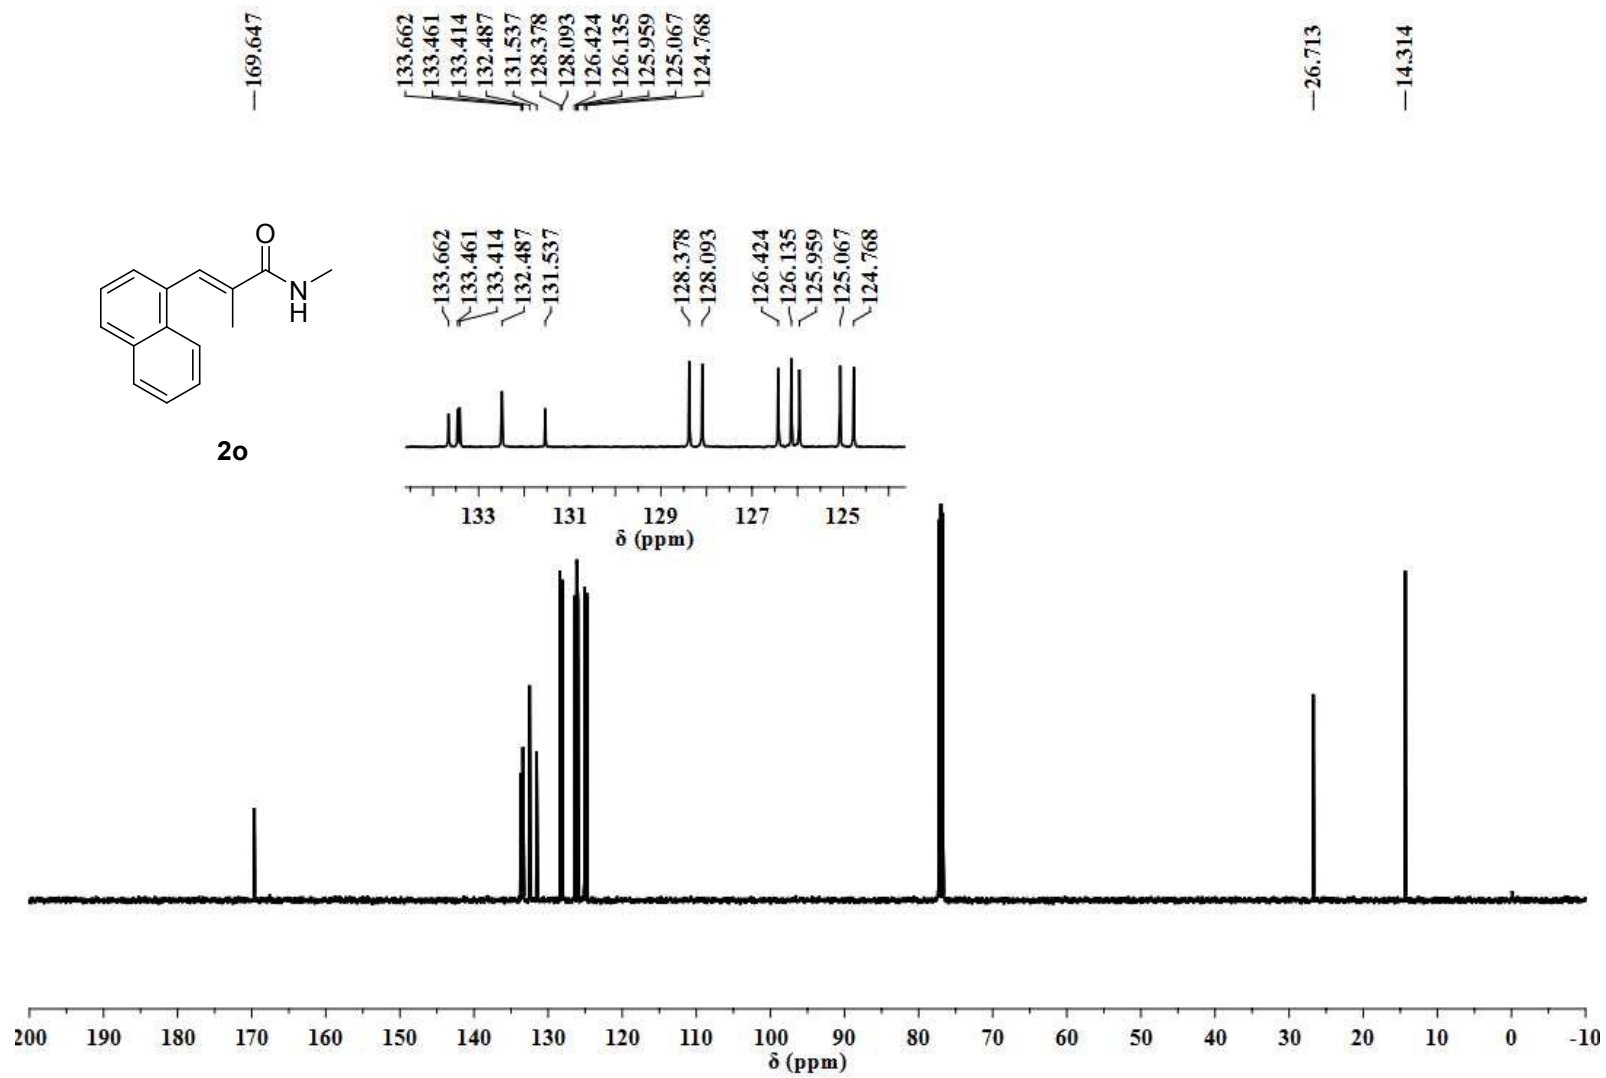



8.223  
8.206  
7.864  
7.847  
7.828  
7.785  
7.783  
7.770  
7.769  
7.332  
7.274  
7.272  
6.284

2.988  
2.978

1.918  
1.915

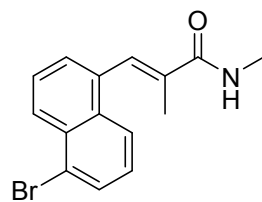

2p

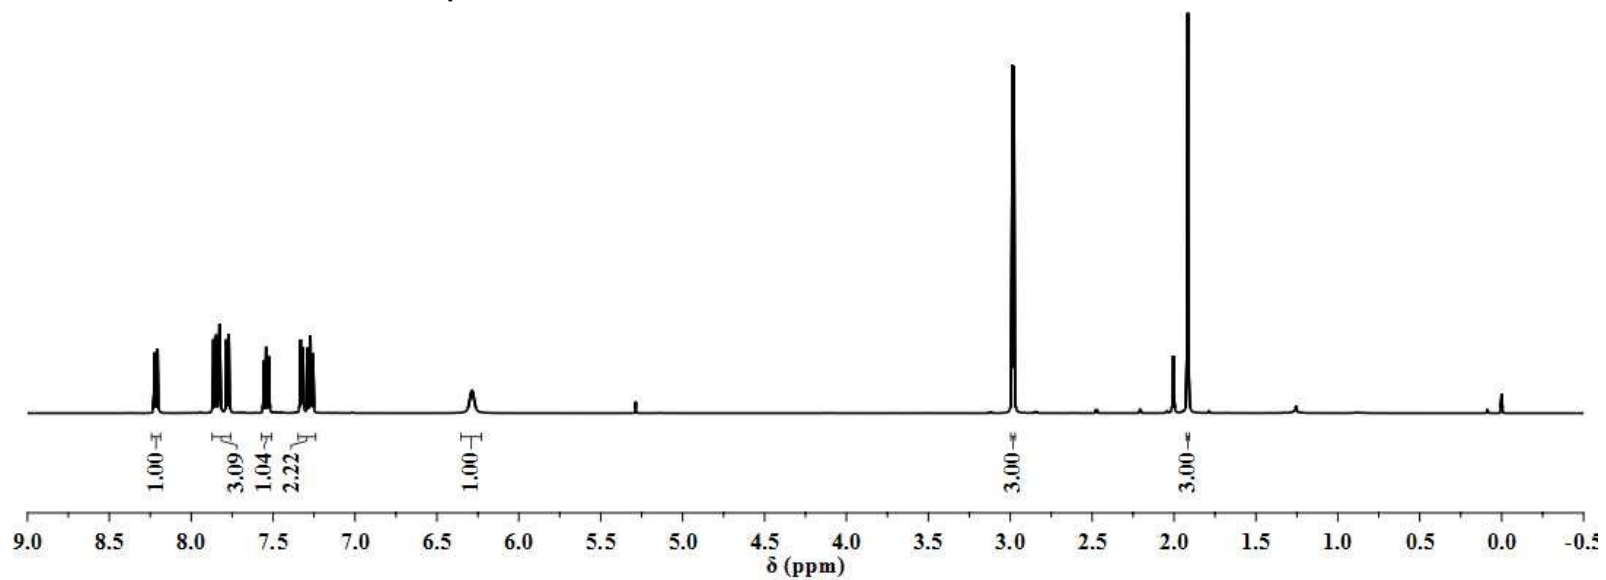

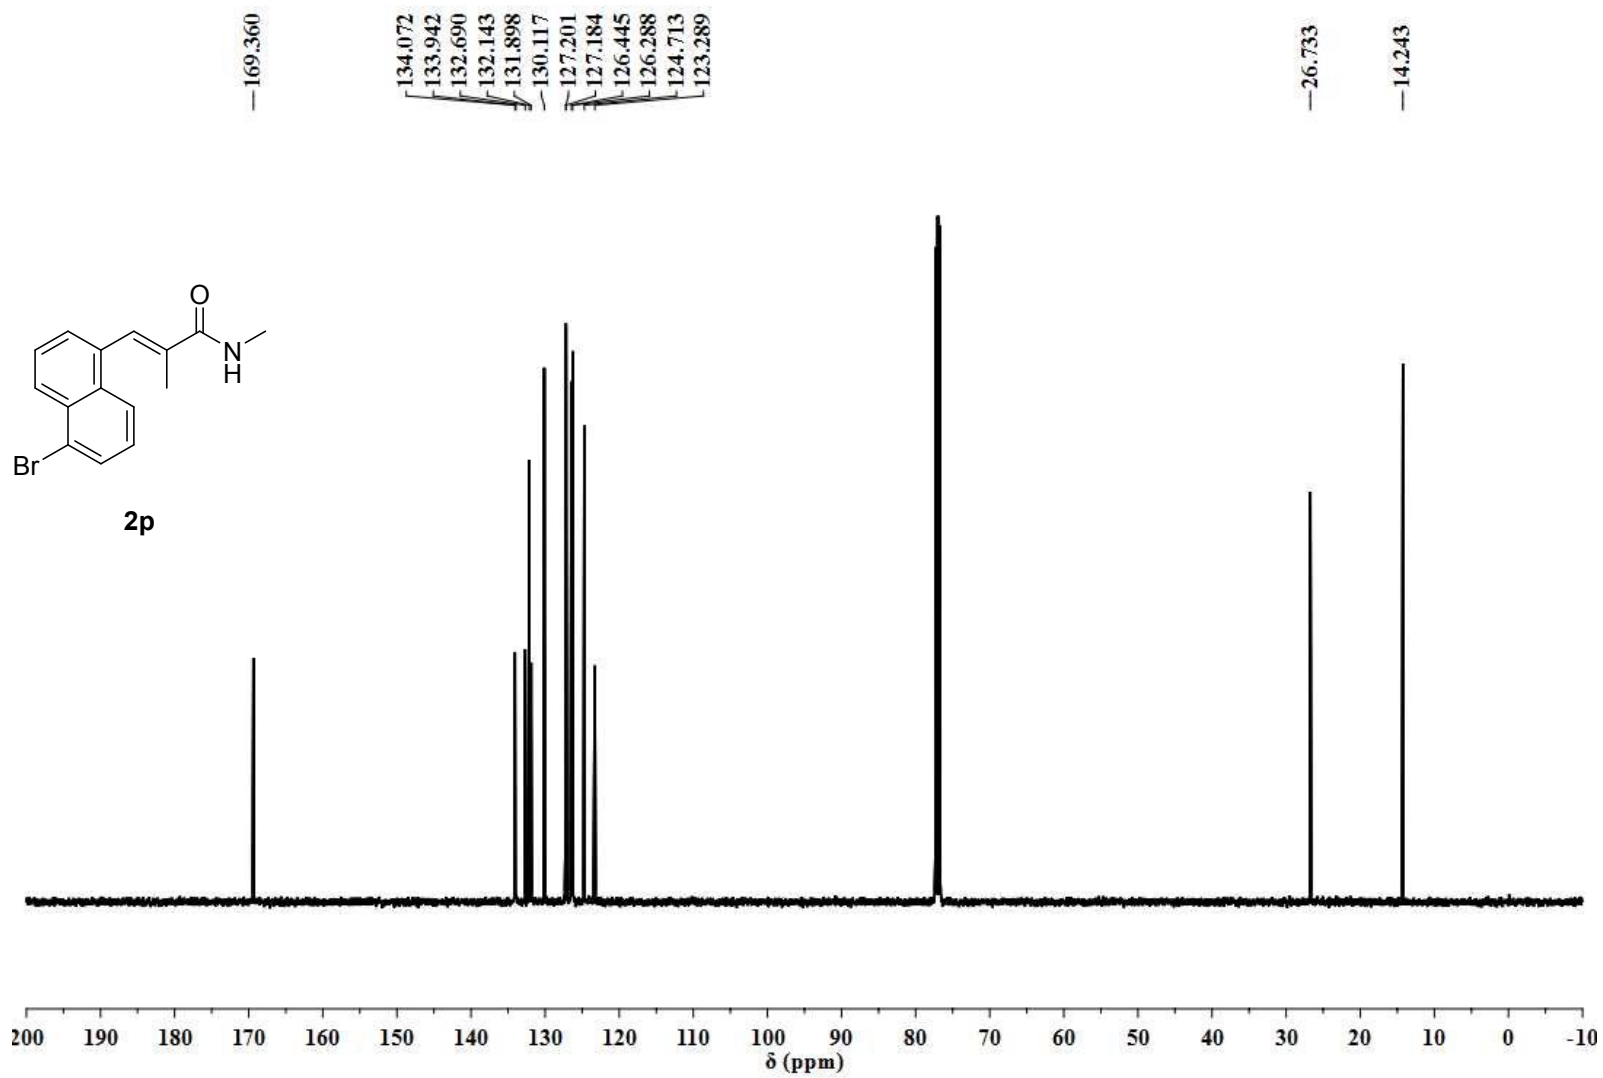

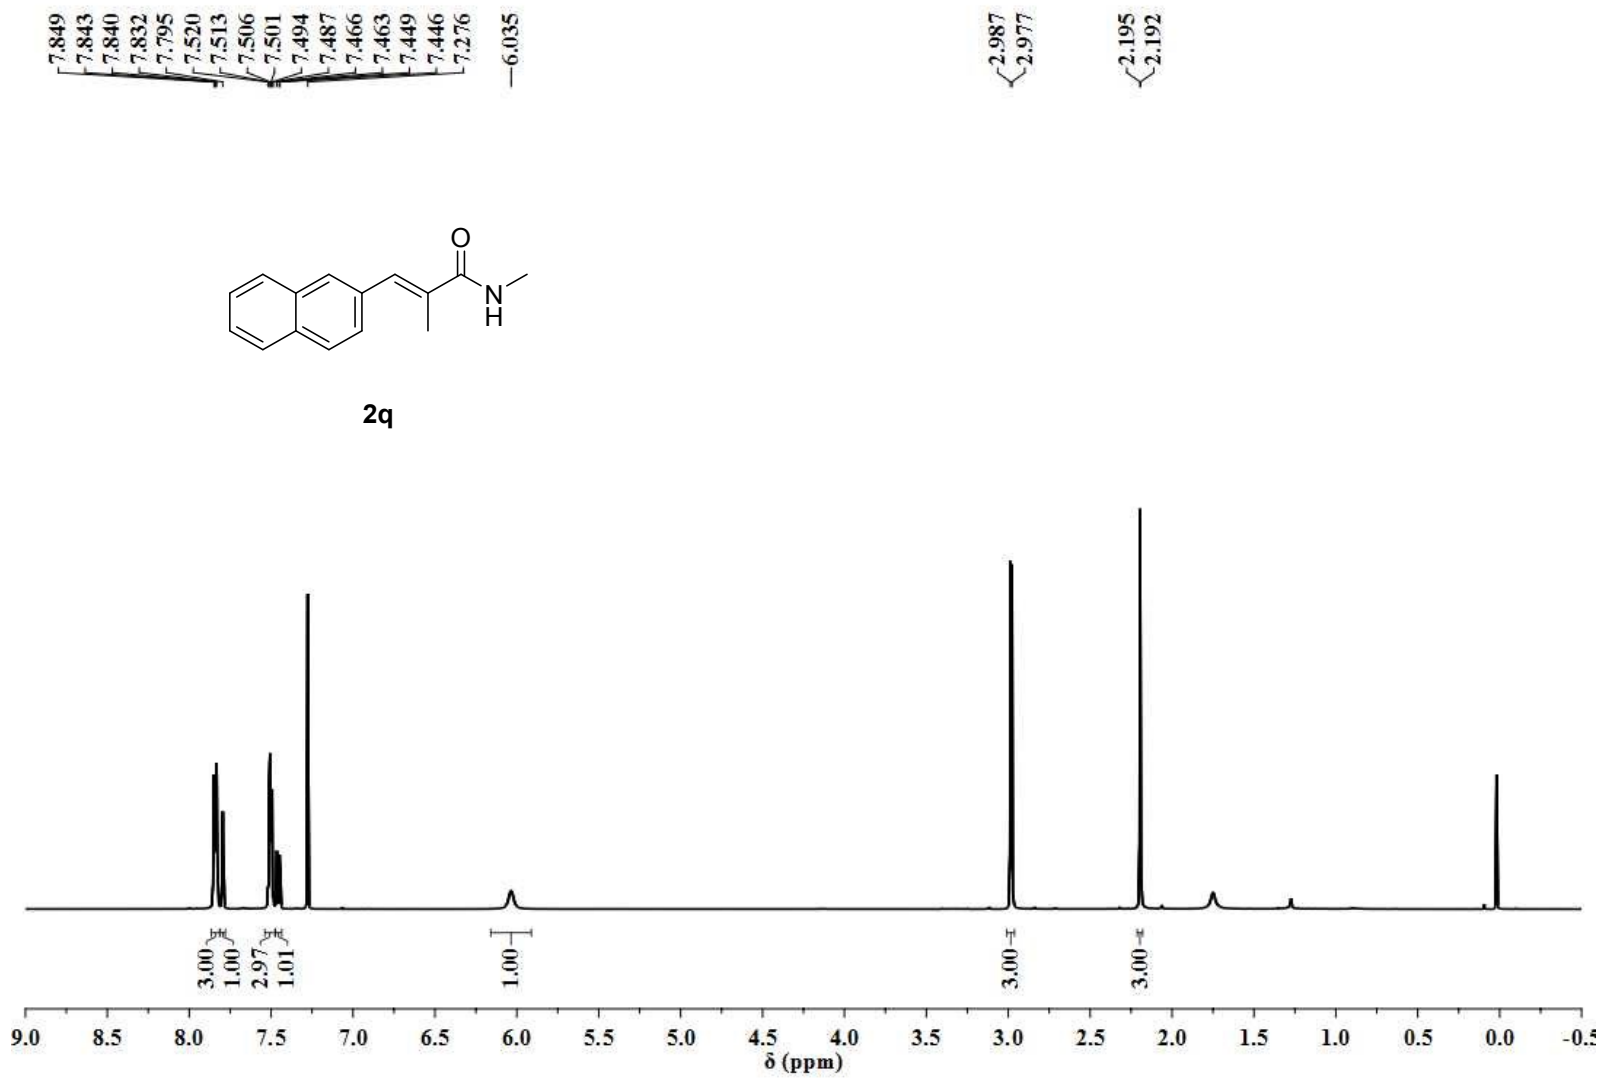

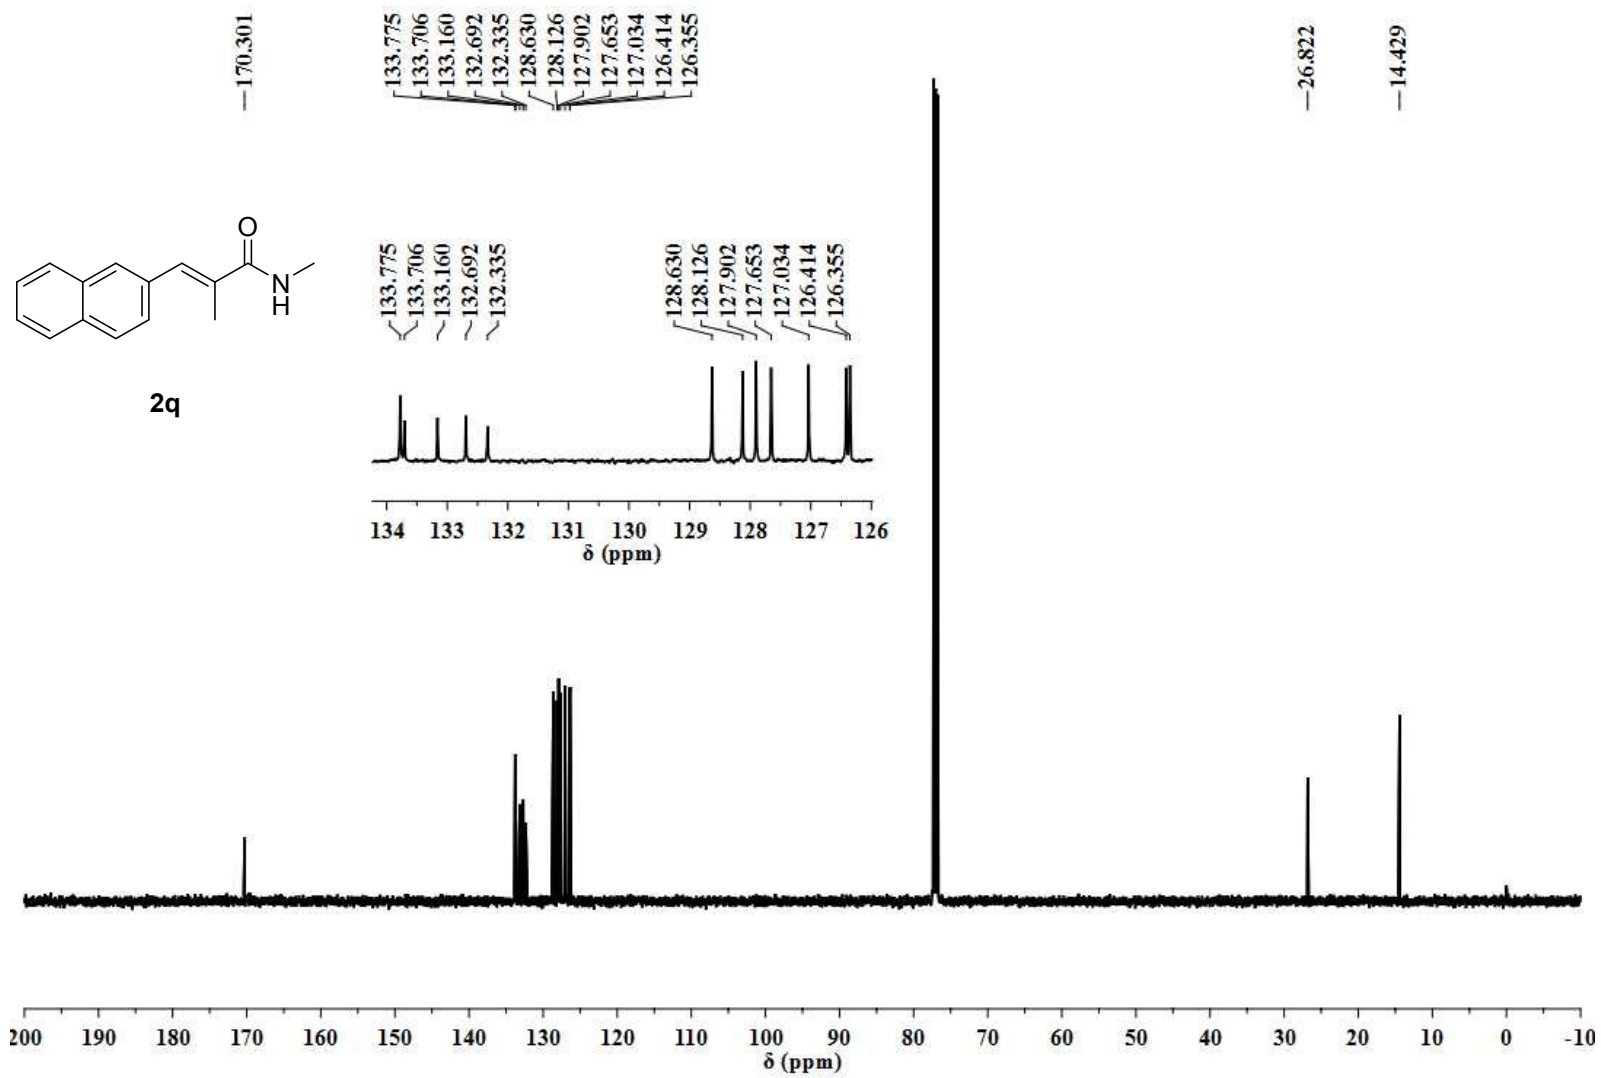

8.630  
8.628  
8.620  
7.696  
7.692  
7.680  
7.677  
7.665  
7.661  
7.322  
7.306  
7.279  
7.277  
7.184  
7.174  
7.172  
7.169  
7.159

2.931  
2.921

2.333  
2.330

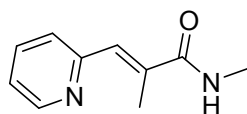

2r

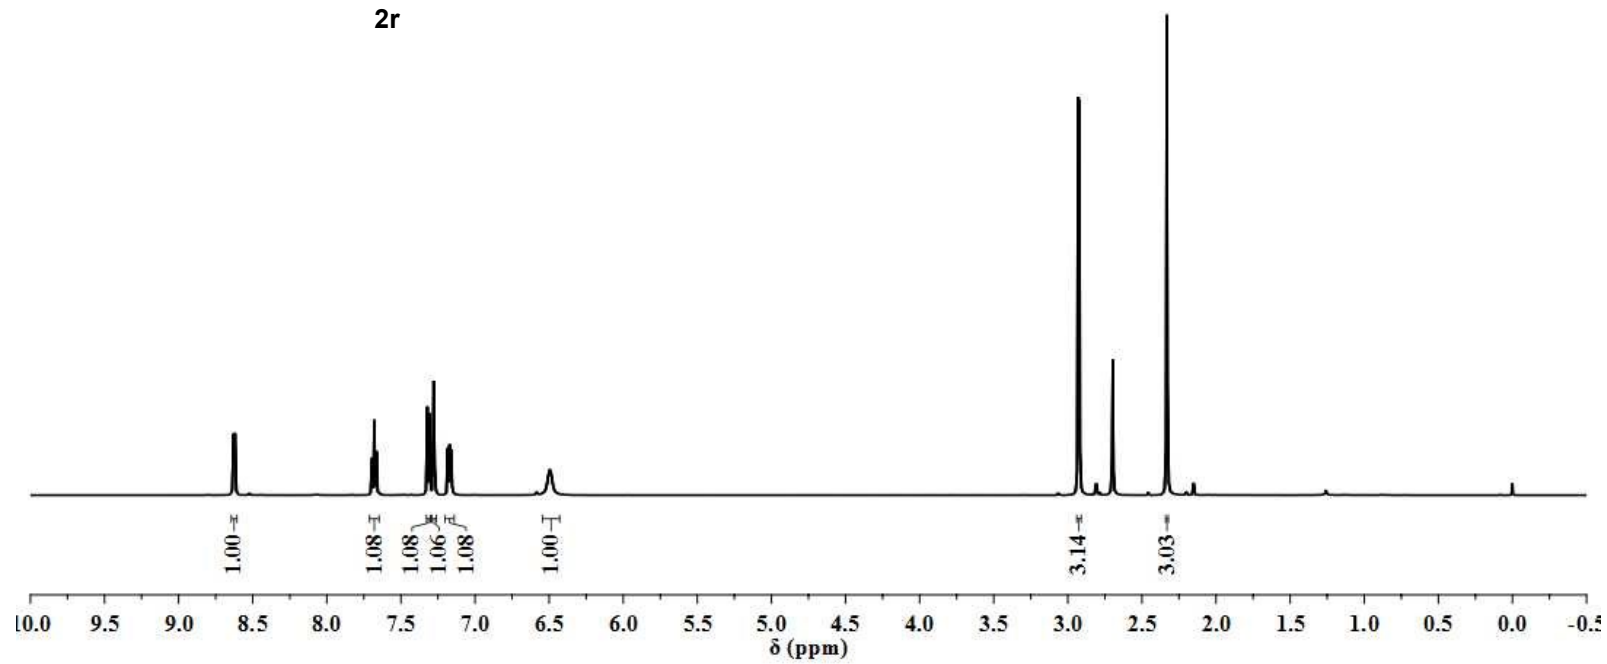

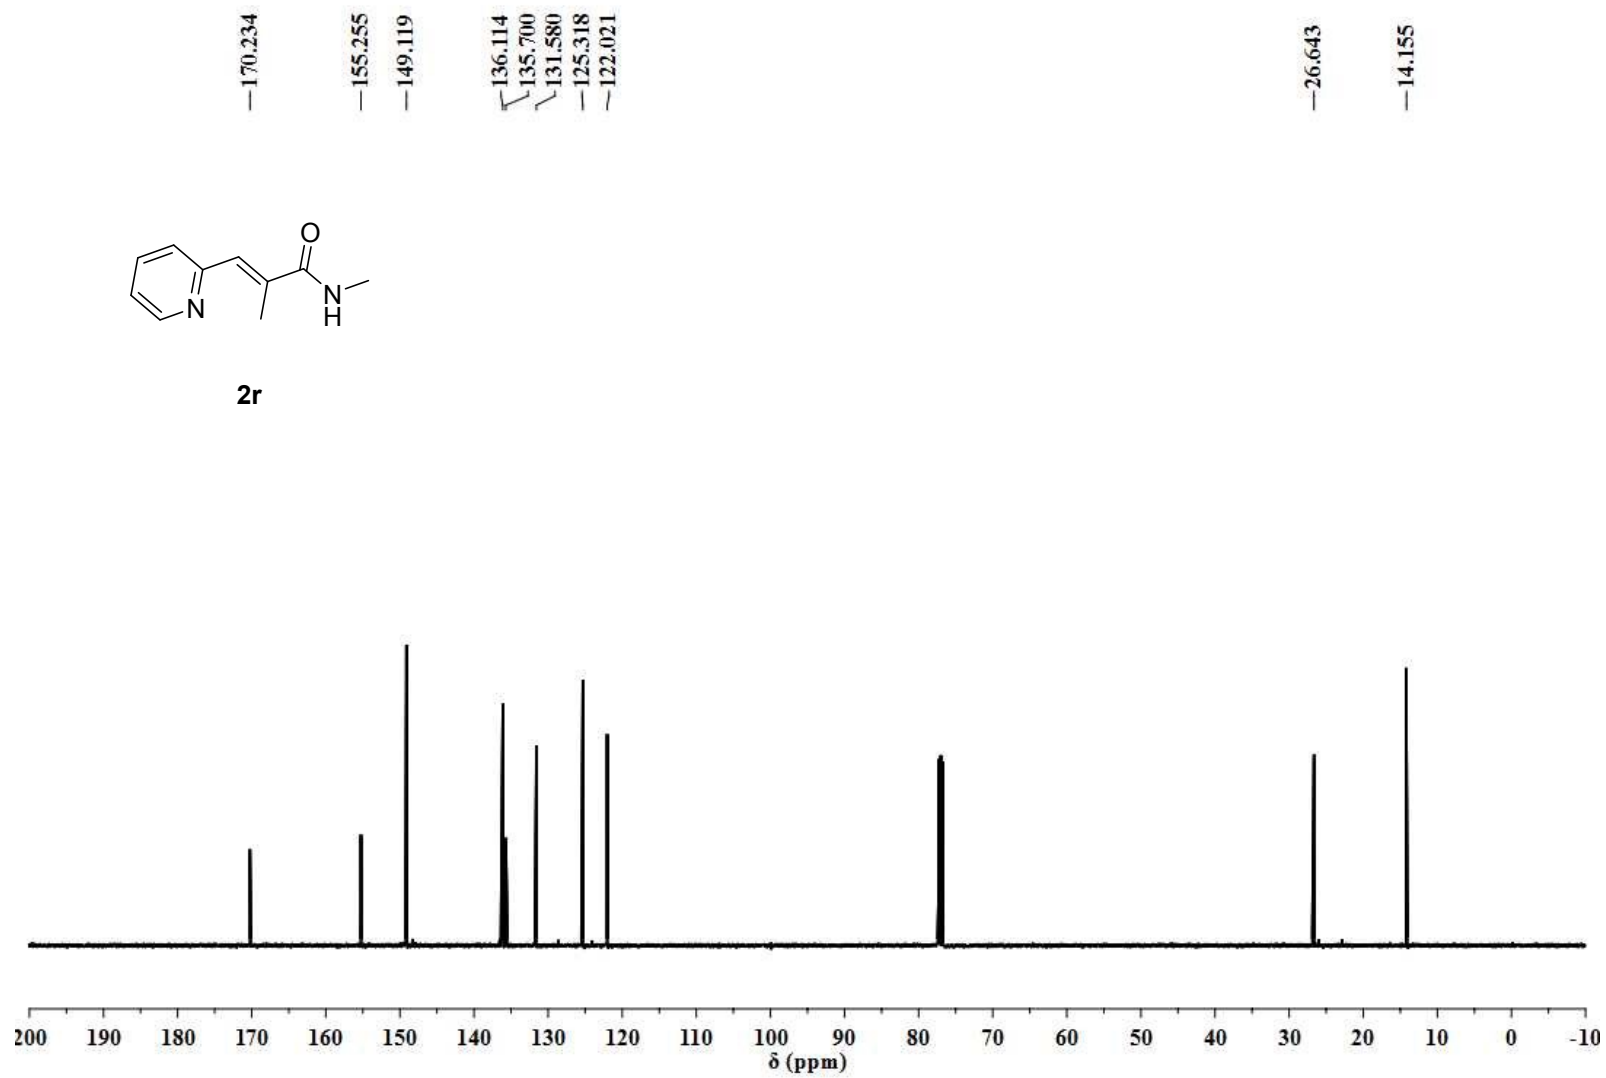

8.474  
8.158  
8.141  
7.643  
7.627  
7.253  
7.247  
7.240  
7.151  
7.146  
7.141  
7.139  
7.132  
7.089  
6.891  
6.877  
5.665  
5.658

2.895  
2.885

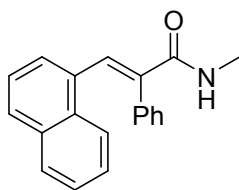

2s

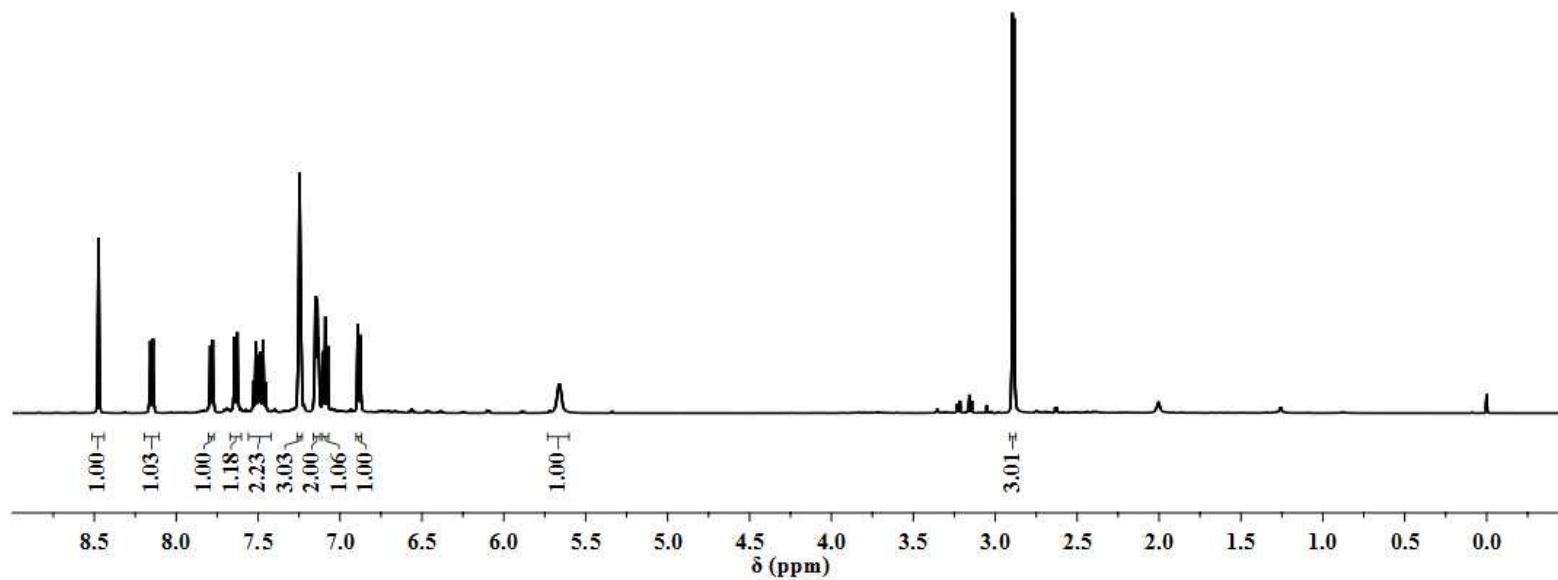

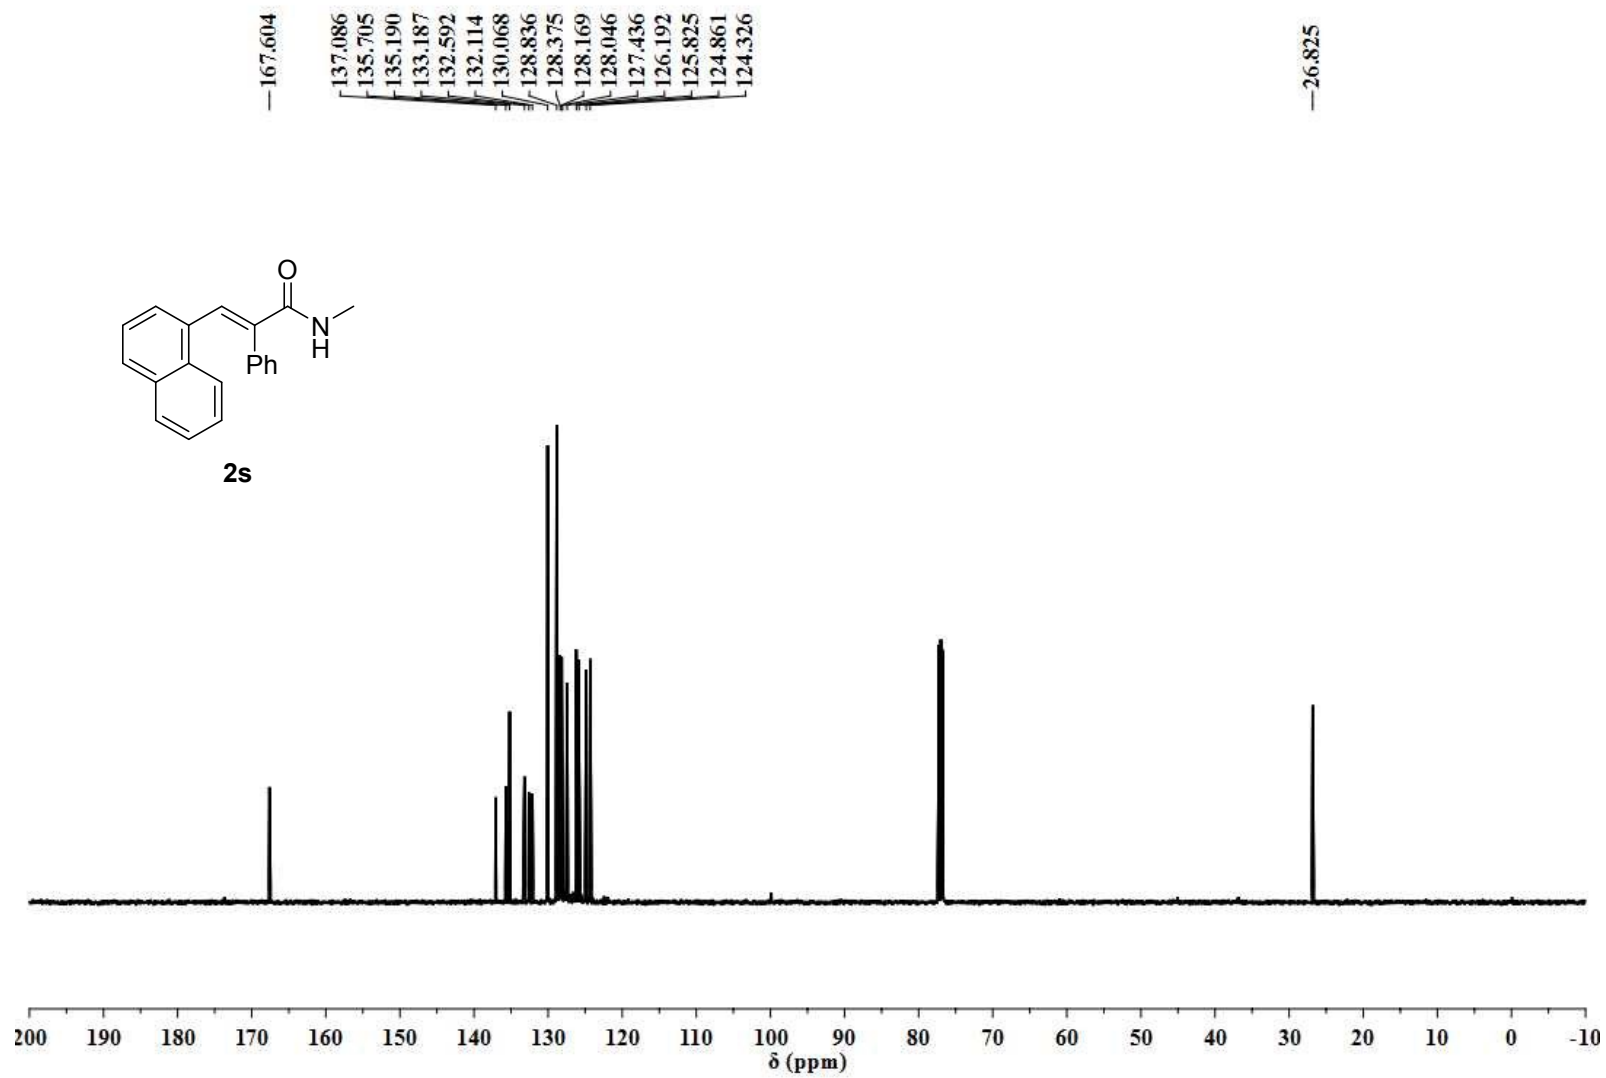

Supplement: d1ob00443c1.pdf [file d1ob00443c1.pdf]
